# Supplementary material
Source: publisher figshare collection journal article supplement (https://gsapubs.figshare.com/articles/dataset/_/20477700)
Supplement: Supplementary file 1 [file 1]

## Sheet: Table_S1_Greenville_Digitized_B
Latitude	Longitude	Strike	Dip	Fabric_Type	Thrust_Sheet	USGS_QD_ID
34.0011	-82.0094	242.1	15	Bedding	Charlotte_Thrust_Sheet	34082-A1
34.0016	-82.0779	208.6	40	Bedding	Charlotte_Thrust_Sheet	34082-A1
34.0023	-82.0611	226.7	70	Foliation	Charlotte_Thrust_Sheet	34082-A1
34.0023	-82.0627	249.8	55	Bedding	Charlotte_Thrust_Sheet	34082-A1
34.0027	-82.0953	282.4	45	Foliation	Charlotte_Thrust_Sheet	34082-A1
34.0027	-82.0957	219	45	Bedding	Charlotte_Thrust_Sheet	34082-A1
34.0028	-82.035	239.6	60	Bedding	Charlotte_Thrust_Sheet	34082-A1
34.0035	-82.0472	223.4	70	Bedding	Charlotte_Thrust_Sheet	34082-A1
34.0039	-82.0467	214.8	80	Foliation	Charlotte_Thrust_Sheet	34082-A1
34.0044	-82.0377	49.6	60	Foliation	Charlotte_Thrust_Sheet	34082-A1
34.0045	-82.0751	208.6	50	Foliation	Charlotte_Thrust_Sheet	34082-A1
34.012	-82.0129	256.2	70	Bedding	Charlotte_Thrust_Sheet	34082-A1
34.0153	-82.0688	203.9	45	Bedding	Charlotte_Thrust_Sheet	34082-A1
34.0169	-82.0814	238.7	25	Bedding	Charlotte_Thrust_Sheet	34082-A1
34.0206	-82.105	338.4	40	Foliation	Charlotte_Thrust_Sheet	34082-A1
34.0215	-82.1249	53.6	90	Foliation	Charlotte_Thrust_Sheet	34082-A1
34.0252	-82.1189	29.9	90	Foliation	Charlotte_Thrust_Sheet	34082-A1
34.0254	-82.063	218.7	70	Foliation	Charlotte_Thrust_Sheet	34082-A1
34.0297	-82.0427	151.7	75	Foliation	Charlotte_Thrust_Sheet	34082-A1
34.0361	-82.0363	209.6	80	Foliation	Charlotte_Thrust_Sheet	34082-A1
34.0383	-82.0271	197.6	25	Foliation	Charlotte_Thrust_Sheet	34082-A1
34.0407	-82.0621	222.8	45	Foliation	Charlotte_Thrust_Sheet	34082-A1
34.0425	-82.0208	354.7	15	Foliation	Charlotte_Thrust_Sheet	34082-A1
34.0447	-82.0894	244.5	80	Foliation	Charlotte_Thrust_Sheet	34082-A1
34.0523	-82.1026	92.1	10	Foliation	Charlotte_Thrust_Sheet	34082-A1
34.0578	-82.1229	237.9	70	Foliation	Charlotte_Thrust_Sheet	34082-A1
34.0629	-82.0965	189.2	80	Foliation	Charlotte_Thrust_Sheet	34082-A1
34.063	-82.03	59.5	65	Foliation	Charlotte_Thrust_Sheet	34082-A1
34.0651	-82.0837	217.4	80	Foliation	Charlotte_Thrust_Sheet	34082-A1
34.0739	-82.1136	323.4	25	Foliation	Charlotte_Thrust_Sheet	34082-A1
34.074	-82.101	345	90	Foliation	Charlotte_Thrust_Sheet	34082-A1
34.0772	-82.0099	355.8	70	Foliation	Charlotte_Thrust_Sheet	34082-A1
34.0814	-82.0883	297	70	Foliation	Charlotte_Thrust_Sheet	34082-A1
34.0836	-82.1034	9.8	80	Foliation	Charlotte_Thrust_Sheet	34082-A1
34.1031	-82.0739	245.6	70	Foliation	Charlotte_Thrust_Sheet	34082-A1
34.1084	-82.0472	300.5	60	Foliation	Charlotte_Thrust_Sheet	34082-A1
34.1184	-82.0074	235.4	40	Foliation	Charlotte_Thrust_Sheet	34082-A1
34.0002	-82.2284	50.9	50	Foliation	Charlotte_Thrust_Sheet	34082-A2
34.0029	-82.1255	253	20	Bedding	Charlotte_Thrust_Sheet	34082-A2
34.0061	-82.1975	49.2	90	Foliation	Charlotte_Thrust_Sheet	34082-A2
34.0066	-82.1264	226.1	50	Foliation	Charlotte_Thrust_Sheet	34082-A2
34.0079	-82.2467	207	40	Foliation	Charlotte_Thrust_Sheet	34082-A2
34.0089	-82.128	248.2	55	Bedding	Charlotte_Thrust_Sheet	34082-A2
34.01	-82.1559	215.6	80	Foliation	Charlotte_Thrust_Sheet	34082-A2
34.0119	-82.1869	36.2	90	Foliation	Charlotte_Thrust_Sheet	34082-A2
34.017	-82.1793	8.9	80	Foliation	Charlotte_Thrust_Sheet	34082-A2
34.0187	-82.1657	262.8	90	Bedding	Charlotte_Thrust_Sheet	34082-A2
34.0207	-82.1756	38.9	35	Foliation	Charlotte_Thrust_Sheet	34082-A2
34.0238	-82.2143	224.2	55	Foliation	Charlotte_Thrust_Sheet	34082-A2
34.0261	-82.1849	232.3	80	Foliation	Charlotte_Thrust_Sheet	34082-A2
34.0314	-82.1603	43.5	50	Bedding	Charlotte_Thrust_Sheet	34082-A2
34.0321	-82.1422	191.4	65	Foliation	Charlotte_Thrust_Sheet	34082-A2
34.0503	-82.2147	12	85	Foliation	Charlotte_Thrust_Sheet	34082-A2
34.053	-82.2181	203	80	Foliation	Charlotte_Thrust_Sheet	34082-A2
34.0555	-82.2222	213.3	40	Foliation	Charlotte_Thrust_Sheet	34082-A2
34.0617	-82.2304	210.1	75	Foliation	Charlotte_Thrust_Sheet	34082-A2
34.062	-82.1341	47.7	65	Foliation	Charlotte_Thrust_Sheet	34082-A2
34.0644	-82.1956	213.6	75	Foliation	Charlotte_Thrust_Sheet	34082-A2
34.0673	-82.174	201.6	80	Foliation	Charlotte_Thrust_Sheet	34082-A2
34.069	-82.1689	21.1	90	Foliation	Charlotte_Thrust_Sheet	34082-A2
34.0699	-82.224	31.2	50	Foliation	Charlotte_Thrust_Sheet	34082-A2
34.079	-82.1498	21.9	80	Foliation	Charlotte_Thrust_Sheet	34082-A2
34.0824	-82.1743	221.4	70	Foliation	Charlotte_Thrust_Sheet	34082-A2
34.0885	-82.1997	202.4	85	Foliation	Charlotte_Thrust_Sheet	34082-A2
34.0944	-82.1375	210.6	80	Foliation	Charlotte_Thrust_Sheet	34082-A2
34.0959	-82.1434	223.1	85	Foliation	Charlotte_Thrust_Sheet	34082-A2
34.1048	-82.2464	194.7	80	Foliation	Charlotte_Thrust_Sheet	34082-A2
34.0012	-82.3082	234.8	60	Foliation	Charlotte_Thrust_Sheet	34082-A3
34.0133	-82.323	166.1	80	Foliation	Charlotte_Thrust_Sheet	34082-A3
34.0165	-82.3122	77.5	15	Foliation	Charlotte_Thrust_Sheet	34082-A3
34.0182	-82.3527	213	50	Foliation	Charlotte_Thrust_Sheet	34082-A3
34.0208	-82.2684	239	70	Foliation	Charlotte_Thrust_Sheet	34082-A3
34.0215	-82.3128	235	65	Foliation	Charlotte_Thrust_Sheet	34082-A3
34.0254	-82.2606	211.5	70	Foliation	Charlotte_Thrust_Sheet	34082-A3
34.0387	-82.2756	177	10	Foliation	Charlotte_Thrust_Sheet	34082-A3
34.0431	-82.2801	209.3	80	Foliation	Charlotte_Thrust_Sheet	34082-A3
34.0518	-82.3679	134.1	90	Foliation	Charlotte_Thrust_Sheet	34082-A3
34.0695	-82.362	270	90	Foliation	Charlotte_Thrust_Sheet	34082-A3
34.0704	-82.2861	67.6	55	Foliation	Charlotte_Thrust_Sheet	34082-A3
34.0729	-82.3583	24.7	80	Foliation	Charlotte_Thrust_Sheet	34082-A3
34.0742	-82.3014	56.6	25	Foliation	Charlotte_Thrust_Sheet	34082-A3
34.0796	-82.2553	20.5	85	Foliation	Charlotte_Thrust_Sheet	34082-A3
34.0814	-82.3032	304.1	10	Foliation	Charlotte_Thrust_Sheet	34082-A3
34.0844	-82.3667	50.1	90	Foliation	Charlotte_Thrust_Sheet	34082-A3
34.0851	-82.3151	265.4	15	Foliation	Charlotte_Thrust_Sheet	34082-A3
34.0854	-82.3337	219	30	Foliation	Charlotte_Thrust_Sheet	34082-A3
34.0874	-82.3188	62.8	85	Foliation	Charlotte_Thrust_Sheet	34082-A3
34.088	-82.3601	49.3	80	Foliation	Charlotte_Thrust_Sheet	34082-A3
34.0901	-82.3222	241	65	Foliation	Charlotte_Thrust_Sheet	34082-A3
34.0918	-82.3522	225	90	Foliation	Charlotte_Thrust_Sheet	34082-A3
34.0926	-82.291	197	15	Foliation	Charlotte_Thrust_Sheet	34082-A3
34.1	-82.3386	67.4	60	Foliation	Charlotte_Thrust_Sheet	34082-A3
34.1023	-82.3453	253.4	75	Foliation	Charlotte_Thrust_Sheet	34082-A3
34.1116	-82.3408	235.7	70	Foliation	Charlotte_Thrust_Sheet	34082-A3
34.1169	-82.3674	73.5	75	Foliation	Charlotte_Thrust_Sheet	34082-A3
34.0034	-82.4821	244.1	65	Foliation	Charlotte_Thrust_Sheet	34082-A4
34.007	-82.4019	214.2	75	Foliation	Charlotte_Thrust_Sheet	34082-A4
34.0108	-82.4396	41.2	80	Foliation	Charlotte_Thrust_Sheet	34082-A4
34.0116	-82.4046	333.4	40	Foliation	Charlotte_Thrust_Sheet	34082-A4
34.0138	-82.4779	281.1	80	Foliation	Charlotte_Thrust_Sheet	34082-A4
34.0149	-82.4639	159.5	55	Foliation	Charlotte_Thrust_Sheet	34082-A4
34.0166	-82.4609	181.3	10	Bedding	Charlotte_Thrust_Sheet	34082-A4
34.0206	-82.4109	347.7	90	Foliation	Charlotte_Thrust_Sheet	34082-A4
34.0223	-82.4962	104.4	60	Foliation	Charlotte_Thrust_Sheet	34082-A4
34.0301	-82.398	188.7	75	Bedding	Charlotte_Thrust_Sheet	34082-A4
34.0362	-82.3925	200.1	50	Bedding	Charlotte_Thrust_Sheet	34082-A4
34.0393	-82.4074	254.6	55	Foliation	Charlotte_Thrust_Sheet	34082-A4
34.0464	-82.4527	130.2	30	Foliation	Charlotte_Thrust_Sheet	34082-A4
34.0518	-82.3791	232.7	70	Foliation	Charlotte_Thrust_Sheet	34082-A4
34.0617	-82.3756	238.8	90	Foliation	Charlotte_Thrust_Sheet	34082-A4
34.0665	-82.3795	225	90	Foliation	Charlotte_Thrust_Sheet	34082-A4
34.0687	-82.4778	229.2	80	Foliation	Charlotte_Thrust_Sheet	34082-A4
34.0712	-82.3978	34.3	75	Foliation	Charlotte_Thrust_Sheet	34082-A4
34.0728	-82.4136	20.6	75	Foliation	Charlotte_Thrust_Sheet	34082-A4
34.0762	-82.484	62.7	70	Foliation	Charlotte_Thrust_Sheet	34082-A4
34.0772	-82.4922	199.8	80	Foliation	Charlotte_Thrust_Sheet	34082-A4
34.0805	-82.3824	49.8	45	Foliation	Charlotte_Thrust_Sheet	34082-A4
34.0819	-82.4846	222.8	80	Foliation	Charlotte_Thrust_Sheet	34082-A4
34.0847	-82.4757	70.4	90	Foliation	Charlotte_Thrust_Sheet	34082-A4
34.0851	-82.4608	248.4	70	Foliation	Charlotte_Thrust_Sheet	34082-A4
34.0859	-82.4376	71.5	80	Foliation	Charlotte_Thrust_Sheet	34082-A4
34.0866	-82.378	80.3	75	Bedding	Charlotte_Thrust_Sheet	34082-A4
34.0902	-82.413	249.2	80	Foliation	Charlotte_Thrust_Sheet	34082-A4
34.0905	-82.4362	71.8	75	Foliation	Charlotte_Thrust_Sheet	34082-A4
34.0946	-82.4667	26.2	90	Foliation	Charlotte_Thrust_Sheet	34082-A4
34.0966	-82.4325	264	75	Foliation	Charlotte_Thrust_Sheet	34082-A4
34.0972	-82.3985	56.8	85	Foliation	Charlotte_Thrust_Sheet	34082-A4
34.0979	-82.3772	246.9	80	Foliation	Charlotte_Thrust_Sheet	34082-A4
34.0991	-82.4825	242.2	80	Foliation	Charlotte_Thrust_Sheet	34082-A4
34.1019	-82.4148	75.2	85	Foliation	Charlotte_Thrust_Sheet	34082-A4
34.1024	-82.4451	250	85	Foliation	Charlotte_Thrust_Sheet	34082-A4
34.1025	-82.3781	90	75	Foliation	Charlotte_Thrust_Sheet	34082-A4
34.1037	-82.4763	44.4	75	Foliation	Charlotte_Thrust_Sheet	34082-A4
34.1043	-82.4542	55.9	80	Foliation	Charlotte_Thrust_Sheet	34082-A4
34.1074	-82.4214	230.8	50	Foliation	Charlotte_Thrust_Sheet	34082-A4
34.1074	-82.4216	260.1	65	Foliation	Charlotte_Thrust_Sheet	34082-A4
34.1081	-82.4487	78.7	80	Foliation	Charlotte_Thrust_Sheet	34082-A4
34.1117	-82.3984	68.6	80	Foliation	Charlotte_Thrust_Sheet	34082-A4
34.1124	-82.3798	254.6	75	Foliation	Charlotte_Thrust_Sheet	34082-A4
34.1133	-82.4939	56.4	25	Foliation	Charlotte_Thrust_Sheet	34082-A4
34.1148	-82.3984	44.5	40	Foliation	Charlotte_Thrust_Sheet	34082-A4
34.1155	-82.4746	243.8	70	Foliation	Charlotte_Thrust_Sheet	34082-A4
34.1166	-82.3828	252.3	75	Foliation	Charlotte_Thrust_Sheet	34082-A4
34.117	-82.4663	90.7	90	Foliation	Charlotte_Thrust_Sheet	34082-A4
34.119	-82.4092	233.2	85	Foliation	Charlotte_Thrust_Sheet	34082-A4
34.1224	-82.3855	237.6	75	Foliation	Charlotte_Thrust_Sheet	34082-A4
34.0045	-82.5744	236	70	Foliation	Charlotte_Thrust_Sheet	34082-A5
34.0076	-82.5357	60.9	80	Foliation	Charlotte_Thrust_Sheet	34082-A5
34.0086	-82.5102	54.8	60	Foliation	Charlotte_Thrust_Sheet	34082-A5
34.0123	-82.5276	249.6	85	Foliation	Charlotte_Thrust_Sheet	34082-A5
34.0134	-82.5118	69.2	70	Foliation	Charlotte_Thrust_Sheet	34082-A5
34.0137	-82.5473	271.4	65	Foliation	Charlotte_Thrust_Sheet	34082-A5
34.0168	-82.5588	241.3	80	Foliation	Charlotte_Thrust_Sheet	34082-A5
34.0174	-82.5019	91.8	70	Bedding	Charlotte_Thrust_Sheet	34082-A5
34.0177	-82.5304	252.8	60	Foliation	Charlotte_Thrust_Sheet	34082-A5
34.0193	-82.5675	58.1	80	Foliation	Charlotte_Thrust_Sheet	34082-A5
34.0194	-82.5931	247.3	25	Foliation	Charlotte_Thrust_Sheet	34082-A5
34.0244	-82.5386	295.8	35	Foliation	Charlotte_Thrust_Sheet	34082-A5
34.0286	-82.5883	61.3	90	Foliation	Charlotte_Thrust_Sheet	34082-A5
34.0376	-82.5942	244.5	85	Bedding	Charlotte_Thrust_Sheet	34082-A5
34.0421	-82.5227	257.7	85	Foliation	Charlotte_Thrust_Sheet	34082-A5
34.0506	-82.6097	51.2	85	Foliation	Charlotte_Thrust_Sheet	34082-A5
34.0616	-82.5258	213.2	90	Foliation	Charlotte_Thrust_Sheet	34082-A5
34.0674	-82.5017	227.4	80	Foliation	Charlotte_Thrust_Sheet	34082-A5
34.0707	-82.6207	60.1	75	Foliation	Charlotte_Thrust_Sheet	34082-A5
34.0719	-82.5085	241	70	Foliation	Charlotte_Thrust_Sheet	34082-A5
34.0734	-82.5019	243.7	60	Foliation	Charlotte_Thrust_Sheet	34082-A5
34.0751	-82.6229	64.7	55	Foliation	Charlotte_Thrust_Sheet	34082-A5
34.0892	-82.6009	344.7	50	Foliation	Charlotte_Thrust_Sheet	34082-A5
34.0912	-82.6227	53.2	55	Foliation	Charlotte_Thrust_Sheet	34082-A5
34.0932	-82.5032	67.3	60	Foliation	Charlotte_Thrust_Sheet	34082-A5
34.102	-82.6189	45.2	25	Foliation	Charlotte_Thrust_Sheet	34082-A5
34.1087	-82.6114	143.6	75	Foliation	Charlotte_Thrust_Sheet	34082-A5
34.113	-82.5184	346.3	45	Foliation	Charlotte_Thrust_Sheet	34082-A5
34.1179	-82.6219	56.8	60	Foliation	Charlotte_Thrust_Sheet	34082-A5
34.0043	-82.648	60.1	90	Foliation	Mafic_Ultramafic_Thrust_Sheet	34082-A6
34.009	-82.7155	30.1	80	Mylonite	Mafic_Ultramafic_Thrust_Sheet	34082-A6
34.0152	-82.6614	207.7	80	Foliation	Mafic_Ultramafic_Thrust_Sheet	34082-A6
34.0311	-82.6566	30.3	50	Foliation	Mafic_Ultramafic_Thrust_Sheet	34082-A6
34.0427	-82.7379	48.6	65	Foliation	Mafic_Ultramafic_Thrust_Sheet	34082-A6
34.0456	-82.6636	246.5	45	Foliation	Mafic_Ultramafic_Thrust_Sheet	34082-A6
34.0519	-82.7328	57.6	70	Foliation	Mafic_Ultramafic_Thrust_Sheet	34082-A6
34.0519	-82.7416	79	80	Mylonite	Mafic_Ultramafic_Thrust_Sheet	34082-A6
34.0526	-82.6962	255.5	20	Foliation	Mafic_Ultramafic_Thrust_Sheet	34082-A6
34.0622	-82.7429	78.1	90	Mylonite	Mafic_Ultramafic_Thrust_Sheet	34082-A6
34.0624	-82.7328	127.3	40	Foliation	Mafic_Ultramafic_Thrust_Sheet	34082-A6
34.0663	-82.6888	70.1	80	Foliation	Charlotte_Thrust_Sheet	34082-A6
34.0683	-82.7424	54.4	20	Foliation	Mafic_Ultramafic_Thrust_Sheet	34082-A6
34.0874	-82.7279	35.3	65	Mylonite	Mafic_Ultramafic_Thrust_Sheet	34082-A6
34.095	-82.6869	242.7	80	Foliation	Charlotte_Thrust_Sheet	34082-A6
34.0991	-82.6777	237.9	80	Foliation	Charlotte_Thrust_Sheet	34082-A6
34.1036	-82.6903	56.7	90	Foliation	Mafic_Ultramafic_Thrust_Sheet	34082-A6
34.1076	-82.7091	301.5	45	Mylonite	Mafic_Ultramafic_Thrust_Sheet	34082-A6
34.1088	-82.7196	272.4	45	Foliation	Mafic_Ultramafic_Thrust_Sheet	34082-A6
34.1108	-82.6712	67.7	70	Foliation	Charlotte_Thrust_Sheet	34082-A6
34.1223	-82.6271	252.9	75	Foliation	Charlotte_Thrust_Sheet	34082-A6
34.0044	-82.7928	279.2	60	Foliation	Mafic_Ultramafic_Thrust_Sheet	34082-A7
34.0048	-82.8354	216.9	70	Foliation	Mafic_Ultramafic_Thrust_Sheet	34082-A7
34.0055	-82.7637	51.4	85	Foliation	Mafic_Ultramafic_Thrust_Sheet	34082-A7
34.0071	-82.8271	10.7	65	Foliation	Mafic_Ultramafic_Thrust_Sheet	34082-A7
34.0077	-82.8553	43.6	80	Mylonite	Mafic_Ultramafic_Thrust_Sheet	34082-A7
34.0111	-82.7923	255.4	50	Foliation	Mafic_Ultramafic_Thrust_Sheet	34082-A7
34.0125	-82.8278	25.9	40	Foliation	Mafic_Ultramafic_Thrust_Sheet	34082-A7
34.0149	-82.7852	308.1	70	Foliation	Mafic_Ultramafic_Thrust_Sheet	34082-A7
34.0251	-82.8088	35.6	35	Foliation	Mafic_Ultramafic_Thrust_Sheet	34082-A7
34.0254	-82.7519	135.7	75	Foliation	Mafic_Ultramafic_Thrust_Sheet	34082-A7
34.027	-82.8191	34.3	35	Foliation	Mafic_Ultramafic_Thrust_Sheet	34082-A7
34.0346	-82.7785	99.4	80	Foliation	Mafic_Ultramafic_Thrust_Sheet	34082-A7
34.0372	-82.7611	200.9	35	Foliation	Mafic_Ultramafic_Thrust_Sheet	34082-A7
34.038	-82.8014	50.6	30	Foliation	Mafic_Ultramafic_Thrust_Sheet	34082-A7
34.0381	-82.8321	41.9	40	Mylonite	Six_Mile_Thrust_Sheet	34082-A7
34.0436	-82.7897	160.2	80	Foliation	Mafic_Ultramafic_Thrust_Sheet	34082-A7
34.0499	-82.7785	300.5	70	Foliation	Mafic_Ultramafic_Thrust_Sheet	34082-A7
34.059	-82.7601	82.2	80	Foliation	Mafic_Ultramafic_Thrust_Sheet	34082-A7
34.0672	-82.7759	11.5	70	Foliation	Mafic_Ultramafic_Thrust_Sheet	34082-A7
34.069	-82.8041	51.5	45	Mylonite	Six_Mile_Thrust_Sheet	34082-A7
34.0693	-82.7784	324.1	35	Foliation	Mafic_Ultramafic_Thrust_Sheet	34082-A7
34.0785	-82.7887	114.6	60	Mylonite	Six_Mile_Thrust_Sheet	34082-A7
34.09	-82.7605	7.1	80	Foliation	Mafic_Ultramafic_Thrust_Sheet	34082-A7
34.09	-82.7747	17.5	60	Mylonite	Six_Mile_Thrust_Sheet	34082-A7
34.0923	-82.7972	67.1	60	Foliation	Six_Mile_Thrust_Sheet	34082-A7
34.0967	-82.7729	286.7	55	Foliation	Six_Mile_Thrust_Sheet	34082-A7
34.1032	-82.7926	351.9	85	Foliation	Six_Mile_Thrust_Sheet	34082-A7
34.1039	-82.7579	180.7	85	Mylonite	Six_Mile_Thrust_Sheet	34082-A7
34.1087	-82.7522	19.5	85	Mylonite	Six_Mile_Thrust_Sheet	34082-A7
34.0735	-82.9504	36.6	66	Foliation	Six_Mile_Thrust_Sheet	34082-A8
34.0737	-82.9456	25.6	44	Foliation	Six_Mile_Thrust_Sheet	34082-A8
34.0779	-82.971	39.8	30	Foliation	Six_Mile_Thrust_Sheet	34082-A8
34.0924	-82.9834	28.2	62	Foliation	Six_Mile_Thrust_Sheet	34082-A8
34.0926	-82.9949	41.7	55	Foliation	Six_Mile_Thrust_Sheet	34082-A8
34.093	-82.9761	4.7	32	Foliation	Six_Mile_Thrust_Sheet	34082-A8
34.1006	-82.9258	7.1	23	Foliation	Six_Mile_Thrust_Sheet	34082-A8
34.1018	-82.9506	41.1	30	Foliation	Six_Mile_Thrust_Sheet	34082-A8
34.102	-82.9325	42.1	55	Foliation	Six_Mile_Thrust_Sheet	34082-A8
34.1029	-82.9591	35.9	71	Foliation	Six_Mile_Thrust_Sheet	34082-A8
34.1031	-82.9158	13.9	57	Foliation	Six_Mile_Thrust_Sheet	34082-A8
34.1031	-82.9408	58.9	55	Foliation	Six_Mile_Thrust_Sheet	34082-A8
34.1064	-82.9066	28.3	26	Foliation	Six_Mile_Thrust_Sheet	34082-A8
34.1073	-82.9637	23.6	67	Foliation	Six_Mile_Thrust_Sheet	34082-A8
34.1123	-82.9756	63.4	78	Foliation	Six_Mile_Thrust_Sheet	34082-A8
34.1151	-82.894	59.3	36	Foliation	Six_Mile_Thrust_Sheet	34082-A8
34.1154	-82.9885	32.3	84	Foliation	Six_Mile_Thrust_Sheet	34082-A8
34.1212	-82.8827	23.6	31	Foliation	Six_Mile_Thrust_Sheet	34082-A8
34.1458	-82.117	246.2	75	Foliation	Charlotte_Thrust_Sheet	34082-B1
34.1788	-82.0067	90.6	75	Foliation	Charlotte_Thrust_Sheet	34082-B1
34.1799	-82.0756	9.7	20	Foliation	Charlotte_Thrust_Sheet	34082-B1
34.2015	-82.1232	66.3	70	Foliation	Charlotte_Thrust_Sheet	34082-B1
34.2032	-82.015	87.6	90	Foliation	Charlotte_Thrust_Sheet	34082-B1
34.2055	-82.0427	110.1	10	Foliation	Charlotte_Thrust_Sheet	34082-B1
34.21	-82.1153	171.9	30	Foliation	Charlotte_Thrust_Sheet	34082-B1
34.2128	-82.0254	177.3	40	Foliation	Charlotte_Thrust_Sheet	34082-B1
34.2257	-82.042	228	85	Foliation	Charlotte_Thrust_Sheet	34082-B1
34.2312	-82.064	328.8	75	Foliation	Charlotte_Thrust_Sheet	34082-B1
34.2348	-82.0318	209.8	35	Foliation	Charlotte_Thrust_Sheet	34082-B1
34.1255	-82.1863	224.4	80	Foliation	Charlotte_Thrust_Sheet	34082-B2
34.1518	-82.2184	193.1	85	Foliation	Charlotte_Thrust_Sheet	34082-B2
34.164	-82.1789	230.2	90	Foliation	Charlotte_Thrust_Sheet	34082-B2
34.1692	-82.1604	257.3	80	Foliation	Charlotte_Thrust_Sheet	34082-B2
34.1717	-82.1848	288.8	80	Foliation	Charlotte_Thrust_Sheet	34082-B2
34.1904	-82.2496	46.8	35	Foliation	Charlotte_Thrust_Sheet	34082-B2
34.1961	-82.2109	12.2	80	Foliation	Charlotte_Thrust_Sheet	34082-B2
34.2105	-82.1833	263.6	45	Foliation	Charlotte_Thrust_Sheet	34082-B2
34.2166	-82.1611	106.8	40	Foliation	Charlotte_Thrust_Sheet	34082-B2
34.2246	-82.2135	238.2	45	Foliation	Charlotte_Thrust_Sheet	34082-B2
34.227	-82.2291	82.2	10	Foliation	Charlotte_Thrust_Sheet	34082-B2
34.2307	-82.2403	70.2	65	Foliation	Charlotte_Thrust_Sheet	34082-B2
34.2403	-82.1619	249.9	35	Foliation	Charlotte_Thrust_Sheet	34082-B2
34.2447	-82.1572	184.8	35	Foliation	Charlotte_Thrust_Sheet	34082-B2
34.246	-82.2482	80.7	70	Foliation	Charlotte_Thrust_Sheet	34082-B2
34.2494	-82.1436	83.2	25	Foliation	Charlotte_Thrust_Sheet	34082-B2
34.1359	-82.3072	28.3	85	Foliation	Charlotte_Thrust_Sheet	34082-B3
34.1365	-82.3494	280.8	90	Foliation	Charlotte_Thrust_Sheet	34082-B3
34.1515	-82.263	35.5	80	Foliation	Charlotte_Thrust_Sheet	34082-B3
34.1524	-82.2889	252.5	30	Foliation	Charlotte_Thrust_Sheet	34082-B3
34.1593	-82.2923	5.9	65	Foliation	Charlotte_Thrust_Sheet	34082-B3
34.1611	-82.273	42.6	85	Foliation	Charlotte_Thrust_Sheet	34082-B3
34.1616	-82.2822	9	80	Foliation	Charlotte_Thrust_Sheet	34082-B3
34.1636	-82.3024	211.8	60	Foliation	Charlotte_Thrust_Sheet	34082-B3
34.1651	-82.2911	258.3	30	Foliation	Charlotte_Thrust_Sheet	34082-B3
34.1704	-82.3542	206.5	80	Foliation	Charlotte_Thrust_Sheet	34082-B3
34.1707	-82.3129	359.2	0	Foliation	Charlotte_Thrust_Sheet	34082-B3
34.1709	-82.3411	221.7	90	Foliation	Charlotte_Thrust_Sheet	34082-B3
34.1723	-82.28	96.8	30	Foliation	Charlotte_Thrust_Sheet	34082-B3
34.1735	-82.2993	30.5	65	Foliation	Charlotte_Thrust_Sheet	34082-B3
34.1803	-82.3645	245.7	35	Foliation	Charlotte_Thrust_Sheet	34082-B3
34.184	-82.3277	216.3	40	Foliation	Charlotte_Thrust_Sheet	34082-B3
34.1847	-82.3187	239.1	50	Foliation	Charlotte_Thrust_Sheet	34082-B3
34.1875	-82.2785	29.9	85	Foliation	Charlotte_Thrust_Sheet	34082-B3
34.1876	-82.29	34.8	80	Foliation	Charlotte_Thrust_Sheet	34082-B3
34.1976	-82.3694	264.4	80	Foliation	Charlotte_Thrust_Sheet	34082-B3
34.1979	-82.289	245.5	65	Foliation	Charlotte_Thrust_Sheet	34082-B3
34.2004	-82.2624	197.9	80	Foliation	Charlotte_Thrust_Sheet	34082-B3
34.2028	-82.2662	224.2	90	Foliation	Charlotte_Thrust_Sheet	34082-B3
34.2046	-82.3227	24.2	40	Foliation	Charlotte_Thrust_Sheet	34082-B3
34.2067	-82.3675	258.1	30	Mylonite	Charlotte_Thrust_Sheet	34082-B3
34.2072	-82.2669	282.9	70	Foliation	Charlotte_Thrust_Sheet	34082-B3
34.2105	-82.3222	240	80	Foliation	Charlotte_Thrust_Sheet	34082-B3
34.2126	-82.3654	277.6	90	Foliation	Charlotte_Thrust_Sheet	34082-B3
34.213	-82.35	218.6	85	Foliation	Charlotte_Thrust_Sheet	34082-B3
34.2171	-82.2682	234.7	65	Foliation	Charlotte_Thrust_Sheet	34082-B3
34.2214	-82.3293	69.8	80	Foliation	Charlotte_Thrust_Sheet	34082-B3
34.2283	-82.318	71.2	60	Foliation	Charlotte_Thrust_Sheet	34082-B3
34.2346	-82.3678	63.4	65	Foliation	Charlotte_Thrust_Sheet	34082-B3
34.2349	-82.2759	63	60	Foliation	Charlotte_Thrust_Sheet	34082-B3
34.2383	-82.3094	78	80	Foliation	Charlotte_Thrust_Sheet	34082-B3
34.243	-82.3539	227.8	90	Foliation	Charlotte_Thrust_Sheet	34082-B3
34.2434	-82.2827	240.9	60	Foliation	Charlotte_Thrust_Sheet	34082-B3
34.2449	-82.3151	261.5	90	Foliation	Charlotte_Thrust_Sheet	34082-B3
34.2454	-82.3378	250.4	45	Foliation	Charlotte_Thrust_Sheet	34082-B3
34.2456	-82.2645	188.7	15	Foliation	Charlotte_Thrust_Sheet	34082-B3
34.2468	-82.2868	216.4	80	Foliation	Charlotte_Thrust_Sheet	34082-B3
34.2484	-82.2638	318.7	35	Foliation	Charlotte_Thrust_Sheet	34082-B3
34.1313	-82.4704	6.2	30	Foliation	Charlotte_Thrust_Sheet	34082-B4
34.1323	-82.3763	201.1	70	Foliation	Charlotte_Thrust_Sheet	34082-B4
34.133	-82.413	85.6	20	Foliation	Charlotte_Thrust_Sheet	34082-B4
34.1415	-82.4345	8.6	90	Foliation	Charlotte_Thrust_Sheet	34082-B4
34.1477	-82.4537	35.4	30	Foliation	Charlotte_Thrust_Sheet	34082-B4
34.1477	-82.4537	64	50	Foliation	Charlotte_Thrust_Sheet	34082-B4
34.1549	-82.4852	23.8	85	Foliation	Charlotte_Thrust_Sheet	34082-B4
34.1626	-82.4886	333.4	40	Mylonite	Charlotte_Thrust_Sheet	34082-B4
34.1675	-82.405	53.8	50	Foliation	Charlotte_Thrust_Sheet	34082-B4
34.1759	-82.4024	56.5	65	Foliation	Charlotte_Thrust_Sheet	34082-B4
34.1841	-82.3814	255.8	80	Foliation	Charlotte_Thrust_Sheet	34082-B4
34.1859	-82.3993	11.5	35	Foliation	Charlotte_Thrust_Sheet	34082-B4
34.1958	-82.4767	61	60	Foliation	Charlotte_Thrust_Sheet	34082-B4
34.197	-82.4567	50	50	Foliation	Charlotte_Thrust_Sheet	34082-B4
34.1977	-82.4849	62.7	75	Foliation	Charlotte_Thrust_Sheet	34082-B4
34.2011	-82.475	62.3	60	Foliation	Charlotte_Thrust_Sheet	34082-B4
34.2012	-82.4957	83.5	70	Foliation	Charlotte_Thrust_Sheet	34082-B4
34.2037	-82.4103	256.2	60	Foliation	Charlotte_Thrust_Sheet	34082-B4
34.2098	-82.4162	67.5	90	Foliation	Charlotte_Thrust_Sheet	34082-B4
34.2118	-82.4208	251.5	75	Foliation	Charlotte_Thrust_Sheet	34082-B4
34.2145	-82.4446	30.9	85	Foliation	Charlotte_Thrust_Sheet	34082-B4
34.2357	-82.4367	32.6	85	Foliation	Laurens_Thrust_Sheet	34082-B4
34.2363	-82.4034	299	90	Foliation	Laurens_Thrust_Sheet	34082-B4
34.2365	-82.3953	252.2	45	Mylonite	Laurens_Thrust_Sheet	34082-B4
34.239	-82.4427	59.3	50	Foliation	Laurens_Thrust_Sheet	34082-B4
34.2397	-82.4707	29.1	25	Foliation	Laurens_Thrust_Sheet	34082-B4
34.2433	-82.39	243.6	65	Foliation	Laurens_Thrust_Sheet	34082-B4
34.2457	-82.4831	56.6	80	Foliation	Laurens_Thrust_Sheet	34082-B4
34.2482	-82.4518	68.2	50	Mylonite	Laurens_Thrust_Sheet	34082-B4
34.2493	-82.484	63.8	90	Foliation	Laurens_Thrust_Sheet	34082-B4
34.1304	-82.5718	206.5	55	Foliation	Charlotte_Thrust_Sheet	34082-B5
34.1311	-82.5638	16.3	70	Foliation	Charlotte_Thrust_Sheet	34082-B5
34.1337	-82.594	51.5	60	Foliation	Charlotte_Thrust_Sheet	34082-B5
34.1338	-82.5101	21.9	75	Foliation	Charlotte_Thrust_Sheet	34082-B5
34.1348	-82.5293	120	80	Foliation	Charlotte_Thrust_Sheet	34082-B5
34.1426	-82.5098	47.4	55	Foliation	Charlotte_Thrust_Sheet	34082-B5
34.1456	-82.5676	243.2	60	Foliation	Charlotte_Thrust_Sheet	34082-B5
34.1486	-82.5995	90.8	65	Foliation	Charlotte_Thrust_Sheet	34082-B5
34.1552	-82.518	276.8	85	Foliation	Charlotte_Thrust_Sheet	34082-B5
34.1587	-82.5866	38.6	90	Foliation	Charlotte_Thrust_Sheet	34082-B5
34.1613	-82.5792	232.3	85	Foliation	Charlotte_Thrust_Sheet	34082-B5
34.1687	-82.5397	79.7	70	Foliation	Charlotte_Thrust_Sheet	34082-B5
34.1789	-82.5121	60.2	65	Foliation	Charlotte_Thrust_Sheet	34082-B5
34.1849	-82.6097	232.8	75	Foliation	Charlotte_Thrust_Sheet	34082-B5
34.1884	-82.5435	19.8	80	Foliation	Charlotte_Thrust_Sheet	34082-B5
34.1943	-82.6131	75.8	70	Foliation	Charlotte_Thrust_Sheet	34082-B5
34.1974	-82.5511	237.9	80	Foliation	Charlotte_Thrust_Sheet	34082-B5
34.1976	-82.5175	70.3	70	Foliation	Charlotte_Thrust_Sheet	34082-B5
34.2022	-82.5536	74.6	60	Foliation	Charlotte_Thrust_Sheet	34082-B5
34.2052	-82.5412	188.4	70	Foliation	Charlotte_Thrust_Sheet	34082-B5
34.2127	-82.557	228.8	60	Foliation	Charlotte_Thrust_Sheet	34082-B5
34.2153	-82.5429	36.4	30	Foliation	Laurens_Thrust_Sheet	34082-B5
34.2166	-82.5243	335.9	75	Foliation	Charlotte_Thrust_Sheet	34082-B5
34.2299	-82.5181	64.4	65	Foliation	Laurens_Thrust_Sheet	34082-B5
34.2329	-82.5429	68.3	80	Mylonite	Charlotte_Thrust_Sheet	34082-B5
34.2352	-82.5541	265.3	70	Mylonite	Six_Mile_Thrust_Sheet	34082-B5
34.2359	-82.5801	84	60	Mylonite	Six_Mile_Thrust_Sheet	34082-B5
34.2372	-82.5231	92.1	85	Mylonite	Laurens_Thrust_Sheet	34082-B5
34.2373	-82.6212	49.5	55	Foliation	Six_Mile_Thrust_Sheet	34082-B5
34.24	-82.5435	69.6	35	Foliation	Six_Mile_Thrust_Sheet	34082-B5
34.2408	-82.5026	86.5	40	Mylonite	Laurens_Thrust_Sheet	34082-B5
34.2411	-82.5918	59.5	60	Foliation	Six_Mile_Thrust_Sheet	34082-B5
34.2413	-82.6124	73.9	75	Foliation	Six_Mile_Thrust_Sheet	34082-B5
34.2418	-82.5244	89.4	60	Mylonite	Six_Mile_Thrust_Sheet	34082-B5
34.2442	-82.606	79.2	65	Foliation	Six_Mile_Thrust_Sheet	34082-B5
34.2454	-82.5171	269.3	65	Mylonite	Six_Mile_Thrust_Sheet	34082-B5
34.2463	-82.6202	57.6	40	Foliation	Six_Mile_Thrust_Sheet	34082-B5
34.2495	-82.5495	11.9	60	Foliation	Six_Mile_Thrust_Sheet	34082-B5
34.1316	-82.7354	57	90	Mylonite	Six_Mile_Thrust_Sheet	34082-B6
34.1361	-82.7175	53.9	50	Foliation	Mafic_Ultramafic_Thrust_Sheet	34082-B6
34.1371	-82.6418	40.1	80	Foliation	Mafic_Ultramafic_Thrust_Sheet	34082-B6
34.1409	-82.7198	224.5	70	Foliation	Mafic_Ultramafic_Thrust_Sheet	34082-B6
34.1487	-82.6442	327.9	80	Foliation	Charlotte_Thrust_Sheet	34082-B6
34.1514	-82.6975	70.3	50	Foliation	Mafic_Ultramafic_Thrust_Sheet	34082-B6
34.1557	-82.7489	58.7	55	Foliation	Six_Mile_Thrust_Sheet	34082-B6
34.1597	-82.6555	225	15	Foliation	Charlotte_Thrust_Sheet	34082-B6
34.1598	-82.7082	83.7	40	Foliation	Charlotte_Thrust_Sheet	34082-B6
34.1602	-82.7287	55.8	45	Foliation	Six_Mile_Thrust_Sheet	34082-B6
34.1646	-82.7112	285.4	35	Foliation	Six_Mile_Thrust_Sheet	34082-B6
34.1762	-82.7022	63.4	60	Foliation	Six_Mile_Thrust_Sheet	34082-B6
34.1763	-82.6694	238.9	85	Foliation	Charlotte_Thrust_Sheet	34082-B6
34.1777	-82.7027	244.9	60	Foliation	Six_Mile_Thrust_Sheet	34082-B6
34.1785	-82.6857	242.1	80	Foliation	Charlotte_Thrust_Sheet	34082-B6
34.1789	-82.6444	64	75	Foliation	Charlotte_Thrust_Sheet	34082-B6
34.1858	-82.648	66.3	80	Foliation	Charlotte_Thrust_Sheet	34082-B6
34.1893	-82.6531	67.7	70	Mylonite	Charlotte_Thrust_Sheet	34082-B6
34.1916	-82.6824	12	30	Mylonite	Charlotte_Thrust_Sheet	34082-B6
34.1922	-82.6615	66	75	Mylonite	Charlotte_Thrust_Sheet	34082-B6
34.1955	-82.7079	19.1	60	Foliation	Six_Mile_Thrust_Sheet	34082-B6
34.2023	-82.6578	78.3	60	Mylonite	Charlotte_Thrust_Sheet	34082-B6
34.21	-82.6323	72.4	45	Mylonite	Charlotte_Thrust_Sheet	34082-B6
34.2111	-82.6585	76.7	75	Foliation	Six_Mile_Thrust_Sheet	34082-B6
34.2117	-82.6677	78.6	75	Foliation	Six_Mile_Thrust_Sheet	34082-B6
34.2134	-82.687	48.8	65	Foliation	Six_Mile_Thrust_Sheet	34082-B6
34.215	-82.6321	75.9	80	Mylonite	Six_Mile_Thrust_Sheet	34082-B6
34.2153	-82.6727	59.1	70	Foliation	Six_Mile_Thrust_Sheet	34082-B6
34.2172	-82.74	44.4	50	Foliation	Six_Mile_Thrust_Sheet	34082-B6
34.2211	-82.7242	0.8	60	Foliation	Six_Mile_Thrust_Sheet	34082-B6
34.2307	-82.6366	88	60	Foliation	Six_Mile_Thrust_Sheet	34082-B6
34.2321	-82.6699	56	35	Foliation	Six_Mile_Thrust_Sheet	34082-B6
34.2322	-82.7094	68.5	90	Foliation	Six_Mile_Thrust_Sheet	34082-B6
34.235	-82.6736	53.9	35	Foliation	Six_Mile_Thrust_Sheet	34082-B6
34.2456	-82.7448	44.6	40	Foliation	Six_Mile_Thrust_Sheet	34082-B6
34.246	-82.6361	78.6	70	Foliation	Six_Mile_Thrust_Sheet	34082-B6
34.2482	-82.6846	50	50	Foliation	Six_Mile_Thrust_Sheet	34082-B6
34.2495	-82.6588	4.2	43	Foliation	Six_Mile_Thrust_Sheet	34082-B6
34.1347	-82.7783	181.9	45	Foliation	Six_Mile_Thrust_Sheet	34082-B7
34.1349	-82.7852	22.3	55	Foliation	Six_Mile_Thrust_Sheet	34082-B7
34.1388	-82.86	143.5	20	Foliation	Six_Mile_Thrust_Sheet	34082-B7
34.1467	-82.7792	38.6	65	Foliation	Six_Mile_Thrust_Sheet	34082-B7
34.1476	-82.8607	41.8	55	Foliation	Six_Mile_Thrust_Sheet	34082-B7
34.1514	-82.8345	34.8	15	Foliation	Six_Mile_Thrust_Sheet	34082-B7
34.164	-82.8489	66.5	20	Foliation	Six_Mile_Thrust_Sheet	34082-B7
34.1648	-82.8563	26.3	35	Foliation	Six_Mile_Thrust_Sheet	34082-B7
34.165	-82.8593	26.9	35	Foliation	Six_Mile_Thrust_Sheet	34082-B7
34.1729	-82.7895	32.5	65	Foliation	Six_Mile_Thrust_Sheet	34082-B7
34.1792	-82.7947	31.1	60	Foliation	Six_Mile_Thrust_Sheet	34082-B7
34.1815	-82.8078	21.5	60	Foliation	Six_Mile_Thrust_Sheet	34082-B7
34.1838	-82.7963	65.6	45	Foliation	Six_Mile_Thrust_Sheet	34082-B7
34.1852	-82.8223	227.2	90	Foliation	Six_Mile_Thrust_Sheet	34082-B7
34.1867	-82.7975	26.5	45	Foliation	Six_Mile_Thrust_Sheet	34082-B7
34.1885	-82.8618	11.5	30	Foliation	Six_Mile_Thrust_Sheet	34082-B7
34.1961	-82.8636	42.3	65	Foliation	Six_Mile_Thrust_Sheet	34082-B7
34.1964	-82.7552	89.5	80	Foliation	Six_Mile_Thrust_Sheet	34082-B7
34.2007	-82.8627	19.5	45	Foliation	Six_Mile_Thrust_Sheet	34082-B7
34.2131	-82.8677	29.2	60	Foliation	Six_Mile_Thrust_Sheet	34082-B7
34.2142	-82.8324	17.6	90	Foliation	Six_Mile_Thrust_Sheet	34082-B7
34.2232	-82.7938	181.9	70	Foliation	Six_Mile_Thrust_Sheet	34082-B7
34.2244	-82.8615	52.9	65	Foliation	Six_Mile_Thrust_Sheet	34082-B7
34.2264	-82.7726	91.5	75	Foliation	Six_Mile_Thrust_Sheet	34082-B7
34.228	-82.8647	104.4	40	Foliation	Six_Mile_Thrust_Sheet	34082-B7
34.2284	-82.8645	53.6	40	Foliation	Six_Mile_Thrust_Sheet	34082-B7
34.2285	-82.7512	47.1	55	Foliation	Six_Mile_Thrust_Sheet	34082-B7
34.23	-82.7655	12.4	55	Foliation	Six_Mile_Thrust_Sheet	34082-B7
34.2309	-82.825	13.3	65	Foliation	Six_Mile_Thrust_Sheet	34082-B7
34.2352	-82.8156	21.5	30	Foliation	Six_Mile_Thrust_Sheet	34082-B7
34.2374	-82.7526	80.4	70	Foliation	Six_Mile_Thrust_Sheet	34082-B7
34.2389	-82.8286	41.2	35	Foliation	Six_Mile_Thrust_Sheet	34082-B7
34.2413	-82.8047	45.5	60	Foliation	Six_Mile_Thrust_Sheet	34082-B7
34.2424	-82.8668	27.5	55	Foliation	Six_Mile_Thrust_Sheet	34082-B7
34.2433	-82.8319	70	45	Foliation	Six_Mile_Thrust_Sheet	34082-B7
34.2457	-82.7579	56.9	55	Foliation	Six_Mile_Thrust_Sheet	34082-B7
34.2467	-82.8351	36.4	45	Foliation	Six_Mile_Thrust_Sheet	34082-B7
34.2492	-82.8597	35.8	56	Foliation	Six_Mile_Thrust_Sheet	34082-B7
34.1331	-82.9607	36.6	65	Foliation	Six_Mile_Thrust_Sheet	34082-B8
34.1335	-82.9513	38.3	45	Foliation	Six_Mile_Thrust_Sheet	34082-B8
34.1356	-82.9063	324	70	Foliation	Six_Mile_Thrust_Sheet	34082-B8
34.1425	-82.9699	41.4	80	Foliation	Six_Mile_Thrust_Sheet	34082-B8
34.1436	-82.9754	47.5	43	Foliation	Six_Mile_Thrust_Sheet	34082-B8
34.1444	-82.9942	38.6	79	Foliation	Six_Mile_Thrust_Sheet	34082-B8
34.1476	-82.9403	214.7	13	Foliation	Six_Mile_Thrust_Sheet	34082-B8
34.1478	-82.9401	49.9	45	Foliation	Six_Mile_Thrust_Sheet	34082-B8
34.1486	-82.9637	72	62	Foliation	Six_Mile_Thrust_Sheet	34082-B8
34.149	-82.9497	71.3	57	Foliation	Six_Mile_Thrust_Sheet	34082-B8
34.1551	-82.9889	209.6	48	Foliation	Six_Mile_Thrust_Sheet	34082-B8
34.157	-82.9148	35.9	66	Foliation	Six_Mile_Thrust_Sheet	34082-B8
34.1589	-82.9029	229.5	64	Foliation	Six_Mile_Thrust_Sheet	34082-B8
34.1669	-82.876	48	35	Foliation	Six_Mile_Thrust_Sheet	34082-B8
34.1673	-82.9178	31.9	77	Foliation	Six_Mile_Thrust_Sheet	34082-B8
34.1675	-82.8969	41.8	34	Foliation	Six_Mile_Thrust_Sheet	34082-B8
34.1679	-82.9871	213.2	70	Foliation	Six_Mile_Thrust_Sheet	34082-B8
34.1721	-82.9791	196	51	Foliation	Six_Mile_Thrust_Sheet	34082-B8
34.1725	-82.9986	193.7	71	Foliation	Six_Mile_Thrust_Sheet	34082-B8
34.1734	-82.8893	214	35	Foliation	Six_Mile_Thrust_Sheet	34082-B8
34.1742	-82.9474	224	40	Foliation	Six_Mile_Thrust_Sheet	34082-B8
34.1774	-82.9109	68.6	30	Foliation	Six_Mile_Thrust_Sheet	34082-B8
34.1786	-82.9203	52.7	67	Foliation	Six_Mile_Thrust_Sheet	34082-B8
34.1795	-82.8756	28.7	78	Foliation	Six_Mile_Thrust_Sheet	34082-B8
34.1811	-82.9249	78.2	40	Foliation	Six_Mile_Thrust_Sheet	34082-B8
34.1811	-82.9919	22	34	Foliation	Six_Mile_Thrust_Sheet	34082-B8
34.1838	-82.972	17.2	68	Foliation	Six_Mile_Thrust_Sheet	34082-B8
34.1841	-82.8953	207.3	38	Foliation	Six_Mile_Thrust_Sheet	34082-B8
34.1843	-82.8928	29.7	35	Foliation	Six_Mile_Thrust_Sheet	34082-B8
34.1849	-82.9382	12.2	63	Foliation	Six_Mile_Thrust_Sheet	34082-B8
34.1901	-82.9401	205.5	4	Foliation	Six_Mile_Thrust_Sheet	34082-B8
34.1933	-82.9828	202.6	73	Foliation	Six_Mile_Thrust_Sheet	34082-B8
34.1933	-82.9665	221	80	Foliation	Six_Mile_Thrust_Sheet	34082-B8
34.2011	-82.9534	206.2	75	Foliation	Six_Mile_Thrust_Sheet	34082-B8
34.2026	-82.8898	67.8	38	Foliation	Six_Mile_Thrust_Sheet	34082-B8
34.204	-82.9924	183.3	61	Foliation	Six_Mile_Thrust_Sheet	34082-B8
34.204	-82.9658	177.4	74	Foliation	Six_Mile_Thrust_Sheet	34082-B8
34.2059	-82.8755	65.8	26	Foliation	Six_Mile_Thrust_Sheet	34082-B8
34.2071	-82.9419	36.8	73	Foliation	Six_Mile_Thrust_Sheet	34082-B8
34.2084	-82.9024	55.8	60	Foliation	Six_Mile_Thrust_Sheet	34082-B8
34.2086	-82.8792	56.3	87	Foliation	Six_Mile_Thrust_Sheet	34082-B8
34.209	-82.9334	208	47	Foliation	Six_Mile_Thrust_Sheet	34082-B8
34.2093	-82.995	144.1	55	Foliation	Six_Mile_Thrust_Sheet	34082-B8
34.2093	-82.9874	69	53	Foliation	Six_Mile_Thrust_Sheet	34082-B8
34.2107	-82.9511	212.9	85	Foliation	Six_Mile_Thrust_Sheet	34082-B8
34.2155	-82.9254	29.4	62	Foliation	Six_Mile_Thrust_Sheet	34082-B8
34.2183	-82.9966	186.4	51	Foliation	Six_Mile_Thrust_Sheet	34082-B8
34.2189	-82.9617	196	73	Foliation	Six_Mile_Thrust_Sheet	34082-B8
34.2193	-82.8911	58.2	34	Foliation	Six_Mile_Thrust_Sheet	34082-B8
34.2216	-82.9904	33.8	81	Foliation	Six_Mile_Thrust_Sheet	34082-B8
34.2223	-82.9773	207.1	78	Foliation	Six_Mile_Thrust_Sheet	34082-B8
34.2229	-82.9575	178	49	Foliation	Six_Mile_Thrust_Sheet	34082-B8
34.2231	-82.9171	180.5	86	Foliation	Six_Mile_Thrust_Sheet	34082-B8
34.2261	-82.8764	45	33	Foliation	Six_Mile_Thrust_Sheet	34082-B8
34.2264	-82.9846	200.6	37	Foliation	Six_Mile_Thrust_Sheet	34082-B8
34.2265	-82.9137	20	52	Foliation	Six_Mile_Thrust_Sheet	34082-B8
34.2275	-82.9476	49.5	69	Foliation	Six_Mile_Thrust_Sheet	34082-B8
34.2302	-82.9685	230.3	64	Foliation	Six_Mile_Thrust_Sheet	34082-B8
34.2305	-82.9054	42.9	27	Foliation	Six_Mile_Thrust_Sheet	34082-B8
34.2307	-82.9274	205.7	64	Foliation	Six_Mile_Thrust_Sheet	34082-B8
34.2319	-82.8797	50.6	86	Foliation	Six_Mile_Thrust_Sheet	34082-B8
34.2346	-82.9074	53.7	76	Foliation	Six_Mile_Thrust_Sheet	34082-B8
34.2369	-82.9385	38.2	61	Foliation	Six_Mile_Thrust_Sheet	34082-B8
34.2372	-82.9947	120.6	19	Foliation	Six_Mile_Thrust_Sheet	34082-B8
34.243	-82.9564	45.8	68	Foliation	Six_Mile_Thrust_Sheet	34082-B8
34.2441	-82.9656	44.1	90	Foliation	Six_Mile_Thrust_Sheet	34082-B8
34.2451	-82.935	200.4	75	Foliation	Six_Mile_Thrust_Sheet	34082-B8
34.2453	-82.9132	214.8	77	Foliation	Six_Mile_Thrust_Sheet	34082-B8
34.2483	-82.8999	232.9	88	Foliation	Six_Mile_Thrust_Sheet	34082-B8
34.2592	-82.0224	72.4	80	Foliation	Charlotte_Thrust_Sheet	34082-C1
34.2617	-82.0198	96.7	65	Foliation	Charlotte_Thrust_Sheet	34082-C1
34.2867	-82.0488	88.6	35	Foliation	Charlotte_Thrust_Sheet	34082-C1
34.2883	-82.1108	259.5	80	Foliation	Charlotte_Thrust_Sheet	34082-C1
34.2894	-82.0248	73.9	70	Foliation	Charlotte_Thrust_Sheet	34082-C1
34.2906	-82.0301	95.9	65	Foliation	Charlotte_Thrust_Sheet	34082-C1
34.2914	-82.111	112.3	35	Foliation	Charlotte_Thrust_Sheet	34082-C1
34.2994	-82.0263	60.9	60	Foliation	Charlotte_Thrust_Sheet	34082-C1
34.3006	-82.11	71	55	Foliation	Charlotte_Thrust_Sheet	34082-C1
34.3068	-82.0175	72.5	35	Foliation	Charlotte_Thrust_Sheet	34082-C1
34.3243	-82.0879	303.6	40	Foliation	Charlotte_Thrust_Sheet	34082-C1
34.3337	-82.0119	104	60	Foliation	Charlotte_Thrust_Sheet	34082-C1
34.3353	-82.0282	349.3	45	Bedding	Charlotte_Thrust_Sheet	34082-C1
34.3436	-82.0838	227.2	45	Foliation	Charlotte_Thrust_Sheet	34082-C1
34.3442	-82.0873	343.5	50	Foliation	Charlotte_Thrust_Sheet	34082-C1
34.3513	-82.092	39.3	45	Foliation	Charlotte_Thrust_Sheet	34082-C1
34.3618	-82.0917	63	55	Foliation	Charlotte_Thrust_Sheet	34082-C1
34.2552	-82.1813	104.4	75	Foliation	Charlotte_Thrust_Sheet	34082-C2
34.2641	-82.1736	54.5	40	Foliation	Charlotte_Thrust_Sheet	34082-C2
34.2746	-82.1689	253.1	60	Foliation	Charlotte_Thrust_Sheet	34082-C2
34.2781	-82.1523	242.2	35	Foliation	Charlotte_Thrust_Sheet	34082-C2
34.2806	-82.1555	62.9	40	Foliation	Charlotte_Thrust_Sheet	34082-C2
34.2935	-82.137	101.8	65	Foliation	Charlotte_Thrust_Sheet	34082-C2
34.3041	-82.1567	92.8	35	Foliation	Charlotte_Thrust_Sheet	34082-C2
34.3072	-82.1585	85.8	45	Foliation	Charlotte_Thrust_Sheet	34082-C2
34.3097	-82.2233	85.2	90	Foliation	Charlotte_Thrust_Sheet	34082-C2
34.3107	-82.1354	64.5	45	Foliation	Charlotte_Thrust_Sheet	34082-C2
34.3118	-82.1962	73.1	60	Foliation	Charlotte_Thrust_Sheet	34082-C2
34.3137	-82.2226	58.9	90	Foliation	Charlotte_Thrust_Sheet	34082-C2
34.3155	-82.2014	74.3	80	Foliation	Charlotte_Thrust_Sheet	34082-C2
34.3173	-82.1832	106.2	25	Foliation	Charlotte_Thrust_Sheet	34082-C2
34.3188	-82.1749	68.8	40	Foliation	Charlotte_Thrust_Sheet	34082-C2
34.3216	-82.2241	61.8	55	Mylonite	Laurens_Thrust_Sheet	34082-C2
34.3218	-82.2025	64.9	80	Foliation	Charlotte_Thrust_Sheet	34082-C2
34.323	-82.2333	63.2	85	Mylonite	Laurens_Thrust_Sheet	34082-C2
34.3249	-82.2473	77.9	90	Foliation	Laurens_Thrust_Sheet	34082-C2
34.3291	-82.2043	63.6	45	Mylonite	Laurens_Thrust_Sheet	34082-C2
34.3325	-82.2296	114.3	90	Foliation	Laurens_Thrust_Sheet	34082-C2
34.3347	-82.2447	86.7	30	Foliation	Laurens_Thrust_Sheet	34082-C2
34.3373	-82.1978	86.4	30	Foliation	Laurens_Thrust_Sheet	34082-C2
34.3424	-82.2336	105.1	45	Foliation	Laurens_Thrust_Sheet	34082-C2
34.3435	-82.2219	57.6	70	Foliation	Laurens_Thrust_Sheet	34082-C2
34.3456	-82.185	47	10	Foliation	Laurens_Thrust_Sheet	34082-C2
34.3499	-82.1388	28.5	30	Foliation	Charlotte_Thrust_Sheet	34082-C2
34.3686	-82.1319	75.8	70	Foliation	Laurens_Thrust_Sheet	34082-C2
34.3686	-82.1743	70.4	35	Foliation	Laurens_Thrust_Sheet	34082-C2
34.3689	-82.1324	73.9	50	Foliation	Laurens_Thrust_Sheet	34082-C2
34.2605	-82.3474	75.4	75	Foliation	Laurens_Thrust_Sheet	34082-C3
34.2719	-82.2926	59.6	60	Foliation	Charlotte_Thrust_Sheet	34082-C3
34.2756	-82.3461	58.4	60	Foliation	Laurens_Thrust_Sheet	34082-C3
34.2844	-82.2759	38.4	90	Foliation	Charlotte_Thrust_Sheet	34082-C3
34.2921	-82.2793	255	75	Foliation	Laurens_Thrust_Sheet	34082-C3
34.3032	-82.3636	58.2	65	Foliation	Laurens_Thrust_Sheet	34082-C3
34.3087	-82.324	65.7	60	Foliation	Laurens_Thrust_Sheet	34082-C3
34.3092	-82.2668	246.3	55	Foliation	Laurens_Thrust_Sheet	34082-C3
34.317	-82.2568	57.7	90	Foliation	Laurens_Thrust_Sheet	34082-C3
34.3246	-82.2623	85.2	75	Foliation	Laurens_Thrust_Sheet	34082-C3
34.3252	-82.3283	55.5	35	Foliation	Laurens_Thrust_Sheet	34082-C3
34.3288	-82.26	67.6	30	Foliation	Laurens_Thrust_Sheet	34082-C3
34.3323	-82.2608	73.3	65	Foliation	Laurens_Thrust_Sheet	34082-C3
34.3394	-82.3082	1.8	0	Foliation	Laurens_Thrust_Sheet	34082-C3
34.3397	-82.2599	70.5	35	Foliation	Laurens_Thrust_Sheet	34082-C3
34.341	-82.3229	34.8	45	Foliation	Laurens_Thrust_Sheet	34082-C3
34.3424	-82.2992	45.2	45	Foliation	Laurens_Thrust_Sheet	34082-C3
34.3479	-82.3265	76.7	90	Foliation	Laurens_Thrust_Sheet	34082-C3
34.3488	-82.3139	59.5	20	Foliation	Laurens_Thrust_Sheet	34082-C3
34.3489	-82.2669	18.4	20	Foliation	Laurens_Thrust_Sheet	34082-C3
34.3526	-82.301	20.7	20	Foliation	Laurens_Thrust_Sheet	34082-C3
34.3607	-82.2758	68.6	25	Foliation	Laurens_Thrust_Sheet	34082-C3
34.363	-82.2601	71.1	35	Foliation	Laurens_Thrust_Sheet	34082-C3
34.3671	-82.3724	18.9	55	Foliation	Laurens_Thrust_Sheet	34082-C3
34.3673	-82.2661	70.5	35	Foliation	Laurens_Thrust_Sheet	34082-C3
34.3732	-82.2598	68.2	40	Foliation	Laurens_Thrust_Sheet	34082-C3
34.2524	-82.4104	59.1	35	Foliation	Laurens_Thrust_Sheet	34082-C4
34.2536	-82.4534	68.7	40	Mylonite	Laurens_Thrust_Sheet	34082-C4
34.2548	-82.3945	54.2	45	Foliation	Laurens_Thrust_Sheet	34082-C4
34.2561	-82.4306	66.7	75	Foliation	Laurens_Thrust_Sheet	34082-C4
34.2581	-82.452	75.2	40	Foliation	Laurens_Thrust_Sheet	34082-C4
34.2609	-82.4172	247.6	80	Foliation	Laurens_Thrust_Sheet	34082-C4
34.262	-82.4729	61	75	Foliation	Laurens_Thrust_Sheet	34082-C4
34.2662	-82.4172	68.3	80	Mylonite	Laurens_Thrust_Sheet	34082-C4
34.2697	-82.4779	63.1	60	Foliation	Laurens_Thrust_Sheet	34082-C4
34.2737	-82.3935	243.5	80	Foliation	Laurens_Thrust_Sheet	34082-C4
34.2743	-82.433	76.5	50	Foliation	Laurens_Thrust_Sheet	34082-C4
34.2744	-82.382	237.1	70	Foliation	Laurens_Thrust_Sheet	34082-C4
34.285	-82.4822	76.7	35	Foliation	Laurens_Thrust_Sheet	34082-C4
34.2858	-82.4392	16.5	30	Foliation	Laurens_Thrust_Sheet	34082-C4
34.2877	-82.4796	32.1	35	Foliation	Laurens_Thrust_Sheet	34082-C4
34.2891	-82.4182	77	65	Foliation	Laurens_Thrust_Sheet	34082-C4
34.2901	-82.4672	36.1	30	Foliation	Laurens_Thrust_Sheet	34082-C4
34.2933	-82.4584	15.8	20	Foliation	Laurens_Thrust_Sheet	34082-C4
34.2971	-82.4097	73.5	30	Foliation	Laurens_Thrust_Sheet	34082-C4
34.2972	-82.4699	45.4	45	Foliation	Laurens_Thrust_Sheet	34082-C4
34.3023	-82.3797	56.3	45	Foliation	Laurens_Thrust_Sheet	34082-C4
34.3032	-82.4402	58.6	45	Foliation	Laurens_Thrust_Sheet	34082-C4
34.3039	-82.4841	39.9	60	Foliation	Laurens_Thrust_Sheet	34082-C4
34.3067	-82.4694	83.7	40	Foliation	Laurens_Thrust_Sheet	34082-C4
34.3098	-82.4687	63.5	20	Foliation	Laurens_Thrust_Sheet	34082-C4
34.3109	-82.4027	37.1	35	Foliation	Laurens_Thrust_Sheet	34082-C4
34.3185	-82.4077	28.5	30	Foliation	Laurens_Thrust_Sheet	34082-C4
34.3201	-82.4233	50	30	Foliation	Laurens_Thrust_Sheet	34082-C4
34.324	-82.4288	34.3	30	Foliation	Laurens_Thrust_Sheet	34082-C4
34.3275	-82.4619	50.6	30	Foliation	Laurens_Thrust_Sheet	34082-C4
34.3371	-82.463	34.2	30	Foliation	Laurens_Thrust_Sheet	34082-C4
34.3414	-82.3919	64.2	60	Foliation	Laurens_Thrust_Sheet	34082-C4
34.3422	-82.4959	14.6	80	Foliation	Six_Mile_Thrust_Sheet	34082-C4
34.3495	-82.4128	88	25	Foliation	Laurens_Thrust_Sheet	34082-C4
34.3497	-82.4995	20.1	36	Foliation	Six_Mile_Thrust_Sheet	34082-C4
34.3518	-82.4666	22.2	45	Foliation	Six_Mile_Thrust_Sheet	34082-C4
34.3523	-82.4404	7.3	30	Foliation	Laurens_Thrust_Sheet	34082-C4
34.3531	-82.4454	4.8	20	Foliation	Laurens_Thrust_Sheet	34082-C4
34.3543	-82.4132	52.9	50	Foliation	Laurens_Thrust_Sheet	34082-C4
34.357	-82.4169	43.8	45	Foliation	Laurens_Thrust_Sheet	34082-C4
34.3614	-82.4341	65.5	30	Foliation	Laurens_Thrust_Sheet	34082-C4
34.3644	-82.4231	137.1	25	Foliation	Laurens_Thrust_Sheet	34082-C4
34.3654	-82.4633	65.1	35	Foliation	Six_Mile_Thrust_Sheet	34082-C4
34.2505	-82.6198	46.4	36	Foliation	Six_Mile_Thrust_Sheet	34082-C5
34.2528	-82.5032	68.7	47	Mylonite	Laurens_Thrust_Sheet	34082-C5
34.2541	-82.5377	36.6	35	Foliation	Six_Mile_Thrust_Sheet	34082-C5
34.2547	-82.6073	42.2	66	Foliation	Six_Mile_Thrust_Sheet	34082-C5
34.255	-82.5995	53.7	46	Foliation	Six_Mile_Thrust_Sheet	34082-C5
34.2591	-82.6158	13.5	40	Foliation	Six_Mile_Thrust_Sheet	34082-C5
34.2598	-82.5825	76.7	66	Foliation	Six_Mile_Thrust_Sheet	34082-C5
34.2633	-82.5521	65.4	72	Mylonite	Six_Mile_Thrust_Sheet	34082-C5
34.2634	-82.5227	45.4	46	Foliation	Six_Mile_Thrust_Sheet	34082-C5
34.2638	-82.5887	49.4	48	Foliation	Six_Mile_Thrust_Sheet	34082-C5
34.2661	-82.594	57.8	46	Foliation	Six_Mile_Thrust_Sheet	34082-C5
34.2748	-82.6137	64.7	53	Foliation	Six_Mile_Thrust_Sheet	34082-C5
34.2789	-82.5882	64.3	40	Foliation	Six_Mile_Thrust_Sheet	34082-C5
34.279	-82.5741	112.9	42	Foliation	Six_Mile_Thrust_Sheet	34082-C5
34.2801	-82.6114	88.7	69	Foliation	Six_Mile_Thrust_Sheet	34082-C5
34.2824	-82.598	84.8	53	Foliation	Six_Mile_Thrust_Sheet	34082-C5
34.2828	-82.5716	50.9	64	Foliation	Six_Mile_Thrust_Sheet	34082-C5
34.284	-82.5118	47.7	38	Foliation	Six_Mile_Thrust_Sheet	34082-C5
34.2867	-82.587	72.8	74	Foliation	Six_Mile_Thrust_Sheet	34082-C5
34.2878	-82.5757	61.3	49	Foliation	Six_Mile_Thrust_Sheet	34082-C5
34.2894	-82.5992	89.3	61	Foliation	Six_Mile_Thrust_Sheet	34082-C5
34.2916	-82.6093	108.2	29	Foliation	Six_Mile_Thrust_Sheet	34082-C5
34.2919	-82.5249	18.9	28	Foliation	Six_Mile_Thrust_Sheet	34082-C5
34.2931	-82.5058	52.7	22	Foliation	Six_Mile_Thrust_Sheet	34082-C5
34.2935	-82.6217	57	51	Foliation	Six_Mile_Thrust_Sheet	34082-C5
34.2953	-82.5198	301	65	Foliation	Six_Mile_Thrust_Sheet	34082-C5
34.2966	-82.5773	49.2	35	Foliation	Six_Mile_Thrust_Sheet	34082-C5
34.2981	-82.5561	60.2	57	Foliation	Six_Mile_Thrust_Sheet	34082-C5
34.2996	-82.5614	79.4	47	Foliation	Six_Mile_Thrust_Sheet	34082-C5
34.3013	-82.6083	24.3	18	Foliation	Six_Mile_Thrust_Sheet	34082-C5
34.3029	-82.617	70.4	64	Foliation	Six_Mile_Thrust_Sheet	34082-C5
34.305	-82.503	69.7	61	Foliation	Six_Mile_Thrust_Sheet	34082-C5
34.3056	-82.5697	32.5	49	Foliation	Six_Mile_Thrust_Sheet	34082-C5
34.3087	-82.5982	161.1	70	Foliation	Six_Mile_Thrust_Sheet	34082-C5
34.3111	-82.6172	326.6	34	Foliation	Six_Mile_Thrust_Sheet	34082-C5
34.3112	-82.5807	64.4	37	Foliation	Six_Mile_Thrust_Sheet	34082-C5
34.3121	-82.5924	122.8	31	Foliation	Six_Mile_Thrust_Sheet	34082-C5
34.3132	-82.5041	2.4	28	Foliation	Six_Mile_Thrust_Sheet	34082-C5
34.3185	-82.5349	329.6	58	Foliation	Six_Mile_Thrust_Sheet	34082-C5
34.3186	-82.5855	172.4	38	Foliation	Six_Mile_Thrust_Sheet	34082-C5
34.3191	-82.5682	74.3	27	Foliation	Six_Mile_Thrust_Sheet	34082-C5
34.3199	-82.5565	13.1	36	Foliation	Six_Mile_Thrust_Sheet	34082-C5
34.3208	-82.508	47.5	48	Foliation	Six_Mile_Thrust_Sheet	34082-C5
34.3222	-82.5213	27.2	30	Foliation	Six_Mile_Thrust_Sheet	34082-C5
34.3281	-82.5691	49.6	21	Foliation	Six_Mile_Thrust_Sheet	34082-C5
34.3297	-82.5254	55.9	41	Foliation	Six_Mile_Thrust_Sheet	34082-C5
34.3301	-82.5785	182.7	42	Foliation	Six_Mile_Thrust_Sheet	34082-C5
34.3304	-82.6172	25.1	44	Foliation	Six_Mile_Thrust_Sheet	34082-C5
34.3318	-82.5909	186.7	43	Foliation	Six_Mile_Thrust_Sheet	34082-C5
34.3335	-82.5295	68	52	Foliation	Six_Mile_Thrust_Sheet	34082-C5
34.3359	-82.6201	66.2	27	Foliation	Six_Mile_Thrust_Sheet	34082-C5
34.3367	-82.5497	87.6	33	Foliation	Six_Mile_Thrust_Sheet	34082-C5
34.3382	-82.5049	19.7	49	Foliation	Six_Mile_Thrust_Sheet	34082-C5
34.3384	-82.6031	140.7	50	Foliation	Six_Mile_Thrust_Sheet	34082-C5
34.339	-82.6128	64.6	49	Foliation	Six_Mile_Thrust_Sheet	34082-C5
34.34	-82.5217	11.8	40	Foliation	Six_Mile_Thrust_Sheet	34082-C5
34.3419	-82.5076	12.7	69	Foliation	Six_Mile_Thrust_Sheet	34082-C5
34.342	-82.547	50.3	40	Foliation	Six_Mile_Thrust_Sheet	34082-C5
34.3421	-82.5644	14.8	56	Foliation	Six_Mile_Thrust_Sheet	34082-C5
34.3446	-82.526	54.1	16	Foliation	Six_Mile_Thrust_Sheet	34082-C5
34.3451	-82.5555	44.7	26	Foliation	Six_Mile_Thrust_Sheet	34082-C5
34.3459	-82.6196	68.7	31	Foliation	Six_Mile_Thrust_Sheet	34082-C5
34.3489	-82.5092	25.9	52	Foliation	Six_Mile_Thrust_Sheet	34082-C5
34.349	-82.5704	302.8	30	Foliation	Six_Mile_Thrust_Sheet	34082-C5
34.3506	-82.6083	75.6	26	Foliation	Six_Mile_Thrust_Sheet	34082-C5
34.3509	-82.5886	106.5	22	Foliation	Six_Mile_Thrust_Sheet	34082-C5
34.3553	-82.5365	47.7	15	Foliation	Six_Mile_Thrust_Sheet	34082-C5
34.3554	-82.5609	1.8	31	Foliation	Six_Mile_Thrust_Sheet	34082-C5
34.3597	-82.6023	81.3	37	Foliation	Six_Mile_Thrust_Sheet	34082-C5
34.3598	-82.516	9.5	34	Foliation	Six_Mile_Thrust_Sheet	34082-C5
34.3605	-82.5379	84.1	44	Foliation	Six_Mile_Thrust_Sheet	34082-C5
34.361	-82.5825	292.9	21	Foliation	Six_Mile_Thrust_Sheet	34082-C5
34.3621	-82.5738	51	33	Foliation	Six_Mile_Thrust_Sheet	34082-C5
34.366	-82.5998	103.2	40	Foliation	Six_Mile_Thrust_Sheet	34082-C5
34.3661	-82.5013	27.9	62	Foliation	Paris_Mountain_Thrust_Sheet	34082-C5
34.3676	-82.5379	316.9	29	Foliation	Six_Mile_Thrust_Sheet	34082-C5
34.3703	-82.557	116.8	30	Foliation	Six_Mile_Thrust_Sheet	34082-C5
34.3716	-82.5894	10.9	32	Foliation	Six_Mile_Thrust_Sheet	34082-C5
34.3721	-82.5275	97.5	20	Foliation	Six_Mile_Thrust_Sheet	34082-C5
34.373	-82.5164	36.9	36	Foliation	Six_Mile_Thrust_Sheet	34082-C5
34.2506	-82.722	75.9	75	Foliation	Six_Mile_Thrust_Sheet	34082-C6
34.2515	-82.6416	89	39	Foliation	Six_Mile_Thrust_Sheet	34082-C6
34.2528	-82.6347	27.6	38	Foliation	Six_Mile_Thrust_Sheet	34082-C6
34.2551	-82.7147	72.7	52	Foliation	Six_Mile_Thrust_Sheet	34082-C6
34.2556	-82.6606	75.8	81	Foliation	Six_Mile_Thrust_Sheet	34082-C6
34.2556	-82.6811	61.4	53	Foliation	Six_Mile_Thrust_Sheet	34082-C6
34.2561	-82.6482	58.5	24	Foliation	Six_Mile_Thrust_Sheet	34082-C6
34.2571	-82.7349	121.7	53	Foliation	Six_Mile_Thrust_Sheet	34082-C6
34.2586	-82.634	58.7	34	Foliation	Six_Mile_Thrust_Sheet	34082-C6
34.2588	-82.7287	29.9	38	Foliation	Six_Mile_Thrust_Sheet	34082-C6
34.2657	-82.6514	22.3	24	Foliation	Six_Mile_Thrust_Sheet	34082-C6
34.2661	-82.6546	83.7	48	Foliation	Six_Mile_Thrust_Sheet	34082-C6
34.2702	-82.6951	56.3	38	Foliation	Six_Mile_Thrust_Sheet	34082-C6
34.2702	-82.722	70.4	50	Foliation	Six_Mile_Thrust_Sheet	34082-C6
34.2716	-82.7332	18.6	45	Foliation	Six_Mile_Thrust_Sheet	34082-C6
34.2725	-82.7112	37.5	61	Foliation	Six_Mile_Thrust_Sheet	34082-C6
34.2751	-82.6558	26.5	47	Foliation	Six_Mile_Thrust_Sheet	34082-C6
34.2777	-82.7109	43.7	53	Foliation	Six_Mile_Thrust_Sheet	34082-C6
34.278	-82.6652	54.6	46	Foliation	Six_Mile_Thrust_Sheet	34082-C6
34.2794	-82.7268	59.2	73	Foliation	Six_Mile_Thrust_Sheet	34082-C6
34.2837	-82.6755	57.9	47	Foliation	Six_Mile_Thrust_Sheet	34082-C6
34.2837	-82.6918	57.7	69	Foliation	Six_Mile_Thrust_Sheet	34082-C6
34.2846	-82.6403	98.5	22	Foliation	Six_Mile_Thrust_Sheet	34082-C6
34.286	-82.6615	14	38	Foliation	Six_Mile_Thrust_Sheet	34082-C6
34.2876	-82.6468	359.5	42	Foliation	Six_Mile_Thrust_Sheet	34082-C6
34.2915	-82.749	83	38	Foliation	Six_Mile_Thrust_Sheet	34082-C6
34.2916	-82.6844	59.1	42	Foliation	Six_Mile_Thrust_Sheet	34082-C6
34.2922	-82.6297	49.8	34	Foliation	Six_Mile_Thrust_Sheet	34082-C6
34.2923	-82.6658	21.7	49	Foliation	Six_Mile_Thrust_Sheet	34082-C6
34.2936	-82.7339	237.4	74	Foliation	Six_Mile_Thrust_Sheet	34082-C6
34.2954	-82.7113	78.5	64	Foliation	Six_Mile_Thrust_Sheet	34082-C6
34.296	-82.7065	27	14	Foliation	Six_Mile_Thrust_Sheet	34082-C6
34.2995	-82.655	51.4	47	Foliation	Six_Mile_Thrust_Sheet	34082-C6
34.2997	-82.7168	104.3	56	Foliation	Six_Mile_Thrust_Sheet	34082-C6
34.3025	-82.6338	41.3	34	Foliation	Six_Mile_Thrust_Sheet	34082-C6
34.3026	-82.6858	78.4	72	Foliation	Six_Mile_Thrust_Sheet	34082-C6
34.3073	-82.629	220.6	22	Foliation	Six_Mile_Thrust_Sheet	34082-C6
34.3074	-82.6906	54	30	Foliation	Six_Mile_Thrust_Sheet	34082-C6
34.3082	-82.7095	59.7	59	Foliation	Six_Mile_Thrust_Sheet	34082-C6
34.3096	-82.7366	86.5	5	Foliation	Six_Mile_Thrust_Sheet	34082-C6
34.3101	-82.6812	49.6	60	Foliation	Six_Mile_Thrust_Sheet	34082-C6
34.3102	-82.6577	44.3	73	Foliation	Six_Mile_Thrust_Sheet	34082-C6
34.3105	-82.6356	42	51	Foliation	Six_Mile_Thrust_Sheet	34082-C6
34.3121	-82.663	64.8	34	Foliation	Six_Mile_Thrust_Sheet	34082-C6
34.3131	-82.7485	31.9	21	Foliation	Six_Mile_Thrust_Sheet	34082-C6
34.3166	-82.6834	21.8	68	Foliation	Six_Mile_Thrust_Sheet	34082-C6
34.3178	-82.6936	65	37	Foliation	Six_Mile_Thrust_Sheet	34082-C6
34.3189	-82.7108	346.8	70	Foliation	Six_Mile_Thrust_Sheet	34082-C6
34.3194	-82.6478	57.1	62	Foliation	Six_Mile_Thrust_Sheet	34082-C6
34.3226	-82.6347	33.8	54	Foliation	Six_Mile_Thrust_Sheet	34082-C6
34.323	-82.7395	14.8	46	Foliation	Six_Mile_Thrust_Sheet	34082-C6
34.3293	-82.6496	5.7	55	Foliation	Six_Mile_Thrust_Sheet	34082-C6
34.3321	-82.6305	13.9	26	Foliation	Six_Mile_Thrust_Sheet	34082-C6
34.3364	-82.6484	219.6	84	Mylonite	Six_Mile_Thrust_Sheet	34082-C6
34.3364	-82.6641	64.1	27	Foliation	Six_Mile_Thrust_Sheet	34082-C6
34.3446	-82.6479	83.2	62	Foliation	Six_Mile_Thrust_Sheet	34082-C6
34.3463	-82.6615	79.6	67	Foliation	Six_Mile_Thrust_Sheet	34082-C6
34.3485	-82.6709	76.4	40	Foliation	Six_Mile_Thrust_Sheet	34082-C6
34.351	-82.6337	341.8	84	Mylonite	Six_Mile_Thrust_Sheet	34082-C6
34.3519	-82.664	67	25	Foliation	Six_Mile_Thrust_Sheet	34082-C6
34.3604	-82.6389	59.8	26	Foliation	Six_Mile_Thrust_Sheet	34082-C6
34.3665	-82.6828	88.5	27	Foliation	Six_Mile_Thrust_Sheet	34082-C6
34.3679	-82.7413	220.1	14	Foliation	Six_Mile_Thrust_Sheet	34082-C6
34.3686	-82.7033	59.7	19	Foliation	Six_Mile_Thrust_Sheet	34082-C6
34.3686	-82.7233	33.4	50	Foliation	Six_Mile_Thrust_Sheet	34082-C6
34.3687	-82.7457	36.5	17	Foliation	Six_Mile_Thrust_Sheet	34082-C6
34.3714	-82.6814	45.6	60	Foliation	Six_Mile_Thrust_Sheet	34082-C6
34.2499	-82.802	181.4	80	Foliation	Six_Mile_Thrust_Sheet	34082-C7
34.2509	-82.8392	82.2	79	Foliation	Six_Mile_Thrust_Sheet	34082-C7
34.2527	-82.7519	43.3	58	Foliation	Six_Mile_Thrust_Sheet	34082-C7
34.253	-82.8263	34	44	Foliation	Six_Mile_Thrust_Sheet	34082-C7
34.2535	-82.7818	73.2	48	Foliation	Six_Mile_Thrust_Sheet	34082-C7
34.2541	-82.7886	15.5	54	Foliation	Six_Mile_Thrust_Sheet	34082-C7
34.256	-82.7689	31.2	72	Foliation	Six_Mile_Thrust_Sheet	34082-C7
34.2565	-82.8286	73	63	Foliation	Six_Mile_Thrust_Sheet	34082-C7
34.257	-82.841	49.2	76	Foliation	Six_Mile_Thrust_Sheet	34082-C7
34.2589	-82.7808	33.8	43	Foliation	Six_Mile_Thrust_Sheet	34082-C7
34.2591	-82.7958	36.5	70	Foliation	Six_Mile_Thrust_Sheet	34082-C7
34.2622	-82.8461	39.9	26	Foliation	Six_Mile_Thrust_Sheet	34082-C7
34.2645	-82.8029	46.1	47	Foliation	Six_Mile_Thrust_Sheet	34082-C7
34.2683	-82.8378	37.4	81	Foliation	Six_Mile_Thrust_Sheet	34082-C7
34.2685	-82.7953	99.3	57	Foliation	Six_Mile_Thrust_Sheet	34082-C7
34.269	-82.8109	316.4	83	Foliation	Six_Mile_Thrust_Sheet	34082-C7
34.2752	-82.8468	132.2	63	Foliation	Six_Mile_Thrust_Sheet	34082-C7
34.2757	-82.8107	22.8	32	Foliation	Six_Mile_Thrust_Sheet	34082-C7
34.2775	-82.8314	23.3	56	Foliation	Six_Mile_Thrust_Sheet	34082-C7
34.279	-82.7957	59.5	21	Foliation	Six_Mile_Thrust_Sheet	34082-C7
34.2811	-82.8346	256.8	82	Foliation	Six_Mile_Thrust_Sheet	34082-C7
34.2813	-82.8507	61.3	72	Foliation	Six_Mile_Thrust_Sheet	34082-C7
34.2839	-82.7999	31.4	58	Foliation	Six_Mile_Thrust_Sheet	34082-C7
34.2868	-82.8123	55.3	49	Foliation	Six_Mile_Thrust_Sheet	34082-C7
34.2879	-82.7594	42.5	56	Foliation	Six_Mile_Thrust_Sheet	34082-C7
34.2881	-82.8038	343.6	58	Foliation	Six_Mile_Thrust_Sheet	34082-C7
34.2914	-82.8454	181.6	62	Foliation	Six_Mile_Thrust_Sheet	34082-C7
34.2939	-82.8132	53.1	56	Foliation	Six_Mile_Thrust_Sheet	34082-C7
34.2952	-82.8196	65.2	57	Foliation	Six_Mile_Thrust_Sheet	34082-C7
34.2953	-82.8529	199.4	87	Foliation	Six_Mile_Thrust_Sheet	34082-C7
34.3019	-82.8302	48	79	Foliation	Six_Mile_Thrust_Sheet	34082-C7
34.3024	-82.7559	21.1	39	Foliation	Six_Mile_Thrust_Sheet	34082-C7
34.3027	-82.8219	39.8	76	Foliation	Six_Mile_Thrust_Sheet	34082-C7
34.3029	-82.8097	87.6	344	Foliation	Six_Mile_Thrust_Sheet	34082-C7
34.3037	-82.8543	205.2	45	Foliation	Six_Mile_Thrust_Sheet	34082-C7
34.3037	-82.867	169.5	59	Foliation	Six_Mile_Thrust_Sheet	34082-C7
34.3075	-82.8134	53.5	48	Foliation	Six_Mile_Thrust_Sheet	34082-C7
34.3079	-82.8405	2.4	34	Foliation	Six_Mile_Thrust_Sheet	34082-C7
34.3104	-82.8451	217.8	54	Foliation	Six_Mile_Thrust_Sheet	34082-C7
34.3121	-82.8729	178.3	24	Foliation	Six_Mile_Thrust_Sheet	34082-C7
34.3136	-82.8171	43.7	49	Foliation	Six_Mile_Thrust_Sheet	34082-C7
34.315	-82.778	321.6	75	Foliation	Six_Mile_Thrust_Sheet	34082-C7
34.3164	-82.7993	49.3	48	Foliation	Six_Mile_Thrust_Sheet	34082-C7
34.3176	-82.8168	30.8	17	Foliation	Six_Mile_Thrust_Sheet	34082-C7
34.3181	-82.8053	30.6	63	Foliation	Six_Mile_Thrust_Sheet	34082-C7
34.3189	-82.7819	31.5	20	Foliation	Six_Mile_Thrust_Sheet	34082-C7
34.3199	-82.8522	52.4	15	Foliation	Six_Mile_Thrust_Sheet	34082-C7
34.3221	-82.7945	171.4	34	Foliation	Six_Mile_Thrust_Sheet	34082-C7
34.3223	-82.7874	221.5	43	Foliation	Six_Mile_Thrust_Sheet	34082-C7
34.3235	-82.8065	138.2	63	Foliation	Six_Mile_Thrust_Sheet	34082-C7
34.3267	-82.7559	137.9	36	Foliation	Six_Mile_Thrust_Sheet	34082-C7
34.3273	-82.8145	23.3	80	Foliation	Six_Mile_Thrust_Sheet	34082-C7
34.3279	-82.7805	103	11	Foliation	Six_Mile_Thrust_Sheet	34082-C7
34.3291	-82.8709	204.9	25	Foliation	Six_Mile_Thrust_Sheet	34082-C7
34.3325	-82.8506	173.5	67	Foliation	Six_Mile_Thrust_Sheet	34082-C7
34.3328	-82.7724	350.5	18	Foliation	Six_Mile_Thrust_Sheet	34082-C7
34.3387	-82.7577	60.3	44	Foliation	Six_Mile_Thrust_Sheet	34082-C7
34.3395	-82.7662	193.3	86	Foliation	Six_Mile_Thrust_Sheet	34082-C7
34.3396	-82.8428	171.2	8	Foliation	Six_Mile_Thrust_Sheet	34082-C7
34.3401	-82.8264	75	13	Foliation	Six_Mile_Thrust_Sheet	34082-C7
34.3404	-82.8575	164.1	33	Foliation	Six_Mile_Thrust_Sheet	34082-C7
34.3491	-82.8172	33.8	69	Foliation	Six_Mile_Thrust_Sheet	34082-C7
34.3504	-82.7742	129.8	39	Foliation	Six_Mile_Thrust_Sheet	34082-C7
34.3551	-82.7512	46.4	72	Foliation	Six_Mile_Thrust_Sheet	34082-C7
34.3555	-82.8706	44.5	67	Foliation	Six_Mile_Thrust_Sheet	34082-C7
34.3573	-82.811	33.8	7	Foliation	Six_Mile_Thrust_Sheet	34082-C7
34.3574	-82.7556	139.4	37	Foliation	Six_Mile_Thrust_Sheet	34082-C7
34.3582	-82.7889	66.8	54	Foliation	Six_Mile_Thrust_Sheet	34082-C7
34.3587	-82.8609	25	43	Foliation	Six_Mile_Thrust_Sheet	34082-C7
34.3632	-82.808	288	18	Foliation	Six_Mile_Thrust_Sheet	34082-C7
34.3674	-82.7659	105	46	Foliation	Six_Mile_Thrust_Sheet	34082-C7
34.3705	-82.7834	41.9	16	Foliation	Six_Mile_Thrust_Sheet	34082-C7
34.372	-82.7739	139.3	15	Foliation	Six_Mile_Thrust_Sheet	34082-C7
34.2541	-82.9658	11.1	44	Foliation	Six_Mile_Thrust_Sheet	34082-C8
34.2575	-82.9568	17	69	Foliation	Six_Mile_Thrust_Sheet	34082-C8
34.2594	-82.9936	204.2	43	Foliation	Six_Mile_Thrust_Sheet	34082-C8
34.263	-82.9784	206.8	65	Foliation	Six_Mile_Thrust_Sheet	34082-C8
34.2666	-82.881	112.3	40	Foliation	Six_Mile_Thrust_Sheet	34082-C8
34.2669	-82.964	64.4	39	Foliation	Six_Mile_Thrust_Sheet	34082-C8
34.269	-82.9844	274.3	9	Foliation	Six_Mile_Thrust_Sheet	34082-C8
34.2722	-82.9175	42.9	12	Foliation	Six_Mile_Thrust_Sheet	34082-C8
34.2722	-82.9955	199	50	Foliation	Six_Mile_Thrust_Sheet	34082-C8
34.2728	-82.9759	195.6	56	Foliation	Six_Mile_Thrust_Sheet	34082-C8
34.2754	-82.9357	20.3	70	Foliation	Six_Mile_Thrust_Sheet	34082-C8
34.2756	-82.9001	194.8	80	Foliation	Six_Mile_Thrust_Sheet	34082-C8
34.276	-82.9612	139.8	17	Foliation	Six_Mile_Thrust_Sheet	34082-C8
34.2852	-82.9587	184.8	22	Foliation	Six_Mile_Thrust_Sheet	34082-C8
34.2881	-82.9791	17.4	65	Foliation	Six_Mile_Thrust_Sheet	34082-C8
34.2884	-82.992	144.2	24	Foliation	Six_Mile_Thrust_Sheet	34082-C8
34.289	-82.8764	198.8	35	Foliation	Six_Mile_Thrust_Sheet	34082-C8
34.2921	-82.9336	14.5	67	Foliation	Six_Mile_Thrust_Sheet	34082-C8
34.2957	-82.9467	45.3	41	Foliation	Six_Mile_Thrust_Sheet	34082-C8
34.3018	-82.9886	92.2	24	Foliation	Six_Mile_Thrust_Sheet	34082-C8
34.3022	-82.906	41.9	45	Foliation	Six_Mile_Thrust_Sheet	34082-C8
34.3064	-82.9732	5.3	70	Foliation	Six_Mile_Thrust_Sheet	34082-C8
34.3075	-82.9458	12.8	45	Foliation	Six_Mile_Thrust_Sheet	34082-C8
34.3079	-82.995	171.3	44	Foliation	Six_Mile_Thrust_Sheet	34082-C8
34.3081	-82.8872	49.9	45	Foliation	Six_Mile_Thrust_Sheet	34082-C8
34.3117	-82.9598	7.6	75	Foliation	Six_Mile_Thrust_Sheet	34082-C8
34.3129	-82.9102	6.5	78	Foliation	Six_Mile_Thrust_Sheet	34082-C8
34.3188	-82.9895	176.5	36	Foliation	Six_Mile_Thrust_Sheet	34082-C8
34.3244	-82.9444	6.3	65	Foliation	Six_Mile_Thrust_Sheet	34082-C8
34.3276	-82.9914	48.6	50	Foliation	Six_Mile_Thrust_Sheet	34082-C8
34.3278	-82.9658	288.2	70	Foliation	Six_Mile_Thrust_Sheet	34082-C8
34.328	-82.8865	12.7	54	Foliation	Six_Mile_Thrust_Sheet	34082-C8
34.3307	-82.9134	47.1	35	Foliation	Six_Mile_Thrust_Sheet	34082-C8
34.3351	-82.9725	106.7	35	Foliation	Six_Mile_Thrust_Sheet	34082-C8
34.3373	-82.987	81.7	65	Foliation	Six_Mile_Thrust_Sheet	34082-C8
34.3425	-82.9628	119.8	41	Foliation	Six_Mile_Thrust_Sheet	34082-C8
34.3478	-82.8948	19.3	55	Foliation	Six_Mile_Thrust_Sheet	34082-C8
34.3543	-82.9097	21.9	13	Foliation	Six_Mile_Thrust_Sheet	34082-C8
34.3551	-82.9905	115.5	39	Foliation	Six_Mile_Thrust_Sheet	34082-C8
34.3574	-82.9527	77	28	Foliation	Six_Mile_Thrust_Sheet	34082-C8
34.3587	-82.9334	69.4	34	Foliation	Six_Mile_Thrust_Sheet	34082-C8
34.3612	-82.9654	191.3	15	Foliation	Six_Mile_Thrust_Sheet	34082-C8
34.3683	-82.8773	72.5	36	Foliation	Six_Mile_Thrust_Sheet	34082-C8
34.3693	-82.9461	68.4	45	Foliation	Six_Mile_Thrust_Sheet	34082-C8
34.3696	-82.8952	35.3	31	Foliation	Six_Mile_Thrust_Sheet	34082-C8
34.3702	-82.9698	195.1	33	Foliation	Six_Mile_Thrust_Sheet	34082-C8
34.3828	-82.0125	341.1	50	Foliation	Charlotte_Thrust_Sheet	34082-D1
34.3829	-82.1018	18.1	55	Foliation	Laurens_Thrust_Sheet	34082-D1
34.3835	-82.1154	44.4	20	Foliation	Laurens_Thrust_Sheet	34082-D1
34.385	-82.0537	7.8	90	Foliation	Charlotte_Thrust_Sheet	34082-D1
34.3904	-82.1181	10.3	70	Foliation	Laurens_Thrust_Sheet	34082-D1
34.3931	-82.084	21.1	70	Foliation	Laurens_Thrust_Sheet	34082-D1
34.3949	-82.072	2.1	0	Foliation	Charlotte_Thrust_Sheet	34082-D1
34.3958	-82.063	358.4	0	Bedding	Charlotte_Thrust_Sheet	34082-D1
34.3993	-82.043	51.9	35	Foliation	Charlotte_Thrust_Sheet	34082-D1
34.3999	-82.084	356.6	55	Foliation	Laurens_Thrust_Sheet	34082-D1
34.4063	-82.0127	29	90	Foliation	Charlotte_Thrust_Sheet	34082-D1
34.4091	-82.0599	358.8	0	Foliation	Charlotte_Thrust_Sheet	34082-D1
34.4103	-82.0175	26.8	90	Foliation	Charlotte_Thrust_Sheet	34082-D1
34.4114	-82.0884	22.6	65	Foliation	Laurens_Thrust_Sheet	34082-D1
34.4119	-82.1221	10.7	45	Foliation	Laurens_Thrust_Sheet	34082-D1
34.4125	-82.1098	9.1	45	Foliation	Laurens_Thrust_Sheet	34082-D1
34.4131	-82.0788	0.5	0	Foliation	Laurens_Thrust_Sheet	34082-D1
34.4144	-82.0997	360	0	Foliation	Laurens_Thrust_Sheet	34082-D1
34.4176	-82.0359	354.8	0	Foliation	Charlotte_Thrust_Sheet	34082-D1
34.4186	-82.0543	2.3	0	Foliation	Charlotte_Thrust_Sheet	34082-D1
34.4202	-82.0052	46.6	65	Foliation	Charlotte_Thrust_Sheet	34082-D1
34.4203	-82.046	345.2	20	Foliation	Charlotte_Thrust_Sheet	34082-D1
34.4219	-82.1093	27.8	20	Foliation	Laurens_Thrust_Sheet	34082-D1
34.4236	-82.0275	26.5	20	Foliation	Charlotte_Thrust_Sheet	34082-D1
34.4294	-82.0864	16.7	60	Foliation	Laurens_Thrust_Sheet	34082-D1
34.4301	-82.1028	358.9	45	Foliation	Laurens_Thrust_Sheet	34082-D1
34.4331	-82.0468	359.4	0	Foliation	Charlotte_Thrust_Sheet	34082-D1
34.4341	-82.0707	47.8	50	Foliation	Laurens_Thrust_Sheet	34082-D1
34.438	-82.1091	220.3	90	Foliation	Laurens_Thrust_Sheet	34082-D1
34.4385	-82.0981	251.8	75	Foliation	Laurens_Thrust_Sheet	34082-D1
34.4388	-82.1167	234.8	55	Foliation	Laurens_Thrust_Sheet	34082-D1
34.4413	-82.0165	20.4	90	Foliation	Charlotte_Thrust_Sheet	34082-D1
34.4418	-82.0043	18.4	90	Foliation	Charlotte_Thrust_Sheet	34082-D1
34.4422	-82.0356	59.3	10	Foliation	Charlotte_Thrust_Sheet	34082-D1
34.4426	-82.0909	58.2	90	Foliation	Laurens_Thrust_Sheet	34082-D1
34.4429	-82.058	12.3	85	Foliation	Laurens_Thrust_Sheet	34082-D1
34.4466	-82.1171	37.9	55	Foliation	Laurens_Thrust_Sheet	34082-D1
34.4475	-82.0798	8.3	90	Foliation	Laurens_Thrust_Sheet	34082-D1
34.4488	-82.1047	56.8	50	Foliation	Laurens_Thrust_Sheet	34082-D1
34.4533	-82.0691	23	35	Foliation	Laurens_Thrust_Sheet	34082-D1
34.4541	-82.091	46.3	65	Foliation	Laurens_Thrust_Sheet	34082-D1
34.4548	-82.0581	21.2	65	Foliation	Laurens_Thrust_Sheet	34082-D1
34.4549	-82.1219	345.2	65	Foliation	Laurens_Thrust_Sheet	34082-D1
34.4552	-82.0313	230.7	15	Foliation	Charlotte_Thrust_Sheet	34082-D1
34.462	-82.0248	51.8	50	Foliation	Laurens_Thrust_Sheet	34082-D1
34.4621	-82.1174	24.3	45	Foliation	Laurens_Thrust_Sheet	34082-D1
34.4644	-82.0464	39.2	65	Foliation	Laurens_Thrust_Sheet	34082-D1
34.4666	-82.0333	62.1	65	Foliation	Laurens_Thrust_Sheet	34082-D1
34.4667	-82.0206	71.1	50	Foliation	Laurens_Thrust_Sheet	34082-D1
34.4674	-82.1155	335.5	90	Foliation	Laurens_Thrust_Sheet	34082-D1
34.4702	-82.0491	4.7	90	Foliation	Laurens_Thrust_Sheet	34082-D1
34.4706	-82.0828	7.1	15	Foliation	Laurens_Thrust_Sheet	34082-D1
34.4717	-82.101	298.7	90	Foliation	Laurens_Thrust_Sheet	34082-D1
34.4735	-82.0304	41	45	Foliation	Laurens_Thrust_Sheet	34082-D1
34.4736	-82.0143	9.8	40	Foliation	Laurens_Thrust_Sheet	34082-D1
34.4741	-82.0574	23.9	60	Foliation	Laurens_Thrust_Sheet	34082-D1
34.4768	-82.1164	48.5	25	Foliation	Laurens_Thrust_Sheet	34082-D1
34.4774	-82.0389	38.6	60	Foliation	Laurens_Thrust_Sheet	34082-D1
34.4798	-82.0857	2.7	90	Foliation	Laurens_Thrust_Sheet	34082-D1
34.4805	-82.1011	45.9	50	Foliation	Laurens_Thrust_Sheet	34082-D1
34.4813	-82.0306	12.8	90	Foliation	Laurens_Thrust_Sheet	34082-D1
34.4845	-82.1195	7.8	55	Foliation	Laurens_Thrust_Sheet	34082-D1
34.4852	-82.0587	34.2	35	Foliation	Laurens_Thrust_Sheet	34082-D1
34.4854	-82.1225	356.8	90	Foliation	Laurens_Thrust_Sheet	34082-D1
34.4861	-82.0829	46.1	90	Foliation	Laurens_Thrust_Sheet	34082-D1
34.4874	-82.0434	24.8	70	Foliation	Laurens_Thrust_Sheet	34082-D1
34.4907	-82.0777	10.8	90	Foliation	Laurens_Thrust_Sheet	34082-D1
34.4925	-82.1153	354.1	90	Foliation	Laurens_Thrust_Sheet	34082-D1
34.4934	-82.0526	16.5	75	Foliation	Laurens_Thrust_Sheet	34082-D1
34.4955	-82.0874	38.3	10	Foliation	Laurens_Thrust_Sheet	34082-D1
34.4961	-82.0961	2.6	90	Foliation	Laurens_Thrust_Sheet	34082-D1
34.4963	-82.038	28.7	50	Foliation	Laurens_Thrust_Sheet	34082-D1
34.4978	-82.1198	26.9	90	Foliation	Laurens_Thrust_Sheet	34082-D1
34.3756	-82.2426	4.2	0	Bedding	Laurens_Thrust_Sheet	34082-D2
34.3766	-82.1698	32.3	45	Foliation	Laurens_Thrust_Sheet	34082-D2
34.3776	-82.1634	13	45	Foliation	Laurens_Thrust_Sheet	34082-D2
34.3776	-82.1376	359.4	55	Foliation	Laurens_Thrust_Sheet	34082-D2
34.379	-82.15	4.8	0	Bedding	Laurens_Thrust_Sheet	34082-D2
34.3803	-82.1725	356.2	15	Foliation	Laurens_Thrust_Sheet	34082-D2
34.3806	-82.2273	38.2	50	Foliation	Laurens_Thrust_Sheet	34082-D2
34.3813	-82.2478	46.7	20	Foliation	Laurens_Thrust_Sheet	34082-D2
34.3862	-82.2033	359.2	0	Foliation	Laurens_Thrust_Sheet	34082-D2
34.388	-82.2079	26.4	50	Foliation	Laurens_Thrust_Sheet	34082-D2
34.3899	-82.2378	5.7	50	Foliation	Laurens_Thrust_Sheet	34082-D2
34.3903	-82.2236	39.6	45	Foliation	Laurens_Thrust_Sheet	34082-D2
34.3933	-82.1535	1.4	0	Bedding	Laurens_Thrust_Sheet	34082-D2
34.3956	-82.209	43.8	30	Foliation	Laurens_Thrust_Sheet	34082-D2
34.3973	-82.1489	52	50	Foliation	Laurens_Thrust_Sheet	34082-D2
34.3975	-82.2396	19.8	20	Foliation	Laurens_Thrust_Sheet	34082-D2
34.398	-82.1365	4.9	20	Foliation	Laurens_Thrust_Sheet	34082-D2
34.4001	-82.2179	42.7	35	Foliation	Laurens_Thrust_Sheet	34082-D2
34.4034	-82.1673	35.7	35	Foliation	Laurens_Thrust_Sheet	34082-D2
34.4036	-82.2043	22.7	30	Foliation	Laurens_Thrust_Sheet	34082-D2
34.4041	-82.2292	4.3	15	Foliation	Laurens_Thrust_Sheet	34082-D2
34.4069	-82.2064	1.8	0	Foliation	Laurens_Thrust_Sheet	34082-D2
34.4075	-82.2409	34.7	50	Foliation	Laurens_Thrust_Sheet	34082-D2
34.4113	-82.155	4.6	0	Bedding	Laurens_Thrust_Sheet	34082-D2
34.4145	-82.2061	39	55	Foliation	Laurens_Thrust_Sheet	34082-D2
34.4157	-82.1835	6.6	60	Foliation	Laurens_Thrust_Sheet	34082-D2
34.4159	-82.2121	360	0	Foliation	Laurens_Thrust_Sheet	34082-D2
34.4197	-82.1768	360	65	Foliation	Laurens_Thrust_Sheet	34082-D2
34.4206	-82.1471	28.6	50	Foliation	Laurens_Thrust_Sheet	34082-D2
34.4218	-82.1293	319.7	20	Foliation	Laurens_Thrust_Sheet	34082-D2
34.4233	-82.2302	50.5	70	Foliation	Laurens_Thrust_Sheet	34082-D2
34.4233	-82.1786	360	0	Bedding	Laurens_Thrust_Sheet	34082-D2
34.4246	-82.1982	350.5	15	Foliation	Laurens_Thrust_Sheet	34082-D2
34.4249	-82.2419	41.1	30	Foliation	Laurens_Thrust_Sheet	34082-D2
34.4271	-82.2262	177	20	Foliation	Laurens_Thrust_Sheet	34082-D2
34.4318	-82.2163	9	45	Foliation	Laurens_Thrust_Sheet	34082-D2
34.4333	-82.1822	48.1	20	Foliation	Laurens_Thrust_Sheet	34082-D2
34.4357	-82.175	14.8	60	Foliation	Laurens_Thrust_Sheet	34082-D2
34.4357	-82.2423	40.4	70	Foliation	Laurens_Thrust_Sheet	34082-D2
34.4438	-82.1268	43.4	45	Foliation	Laurens_Thrust_Sheet	34082-D2
34.4462	-82.1696	1.9	60	Foliation	Laurens_Thrust_Sheet	34082-D2
34.4481	-82.227	35.4	90	Foliation	Laurens_Thrust_Sheet	34082-D2
34.4499	-82.1463	15.3	55	Foliation	Laurens_Thrust_Sheet	34082-D2
34.45	-82.1611	15.8	90	Foliation	Laurens_Thrust_Sheet	34082-D2
34.4512	-82.2115	3.9	20	Foliation	Laurens_Thrust_Sheet	34082-D2
34.4525	-82.1975	70.4	35	Foliation	Laurens_Thrust_Sheet	34082-D2
34.4529	-82.2415	37	70	Foliation	Laurens_Thrust_Sheet	34082-D2
34.4561	-82.1958	144.3	60	Foliation	Laurens_Thrust_Sheet	34082-D2
34.4568	-82.185	359.5	0	Foliation	Laurens_Thrust_Sheet	34082-D2
34.463	-82.1658	130.9	75	Foliation	Laurens_Thrust_Sheet	34082-D2
34.4646	-82.1868	65	20	Foliation	Laurens_Thrust_Sheet	34082-D2
34.4651	-82.1616	27.1	55	Foliation	Laurens_Thrust_Sheet	34082-D2
34.4651	-82.1736	346.5	60	Foliation	Laurens_Thrust_Sheet	34082-D2
34.4669	-82.1575	27.4	60	Foliation	Laurens_Thrust_Sheet	34082-D2
34.4673	-82.2125	26.3	60	Foliation	Laurens_Thrust_Sheet	34082-D2
34.4705	-82.1413	78.5	55	Foliation	Laurens_Thrust_Sheet	34082-D2
34.4711	-82.2436	12.3	45	Foliation	Laurens_Thrust_Sheet	34082-D2
34.4715	-82.1846	246.8	90	Foliation	Laurens_Thrust_Sheet	34082-D2
34.4719	-82.2153	36	45	Foliation	Laurens_Thrust_Sheet	34082-D2
34.4752	-82.1609	358.4	60	Foliation	Laurens_Thrust_Sheet	34082-D2
34.4754	-82.1984	360	0	Bedding	Laurens_Thrust_Sheet	34082-D2
34.476	-82.1401	33.4	55	Foliation	Laurens_Thrust_Sheet	34082-D2
34.4766	-82.241	8.5	45	Foliation	Laurens_Thrust_Sheet	34082-D2
34.4776	-82.2184	38.5	45	Foliation	Laurens_Thrust_Sheet	34082-D2
34.4806	-82.1956	153.4	40	Foliation	Laurens_Thrust_Sheet	34082-D2
34.4813	-82.2251	99	10	Foliation	Laurens_Thrust_Sheet	34082-D2
34.484	-82.1622	25.4	90	Foliation	Laurens_Thrust_Sheet	34082-D2
34.4884	-82.1725	112.5	70	Foliation	Laurens_Thrust_Sheet	34082-D2
34.4901	-82.1983	360	90	Foliation	Laurens_Thrust_Sheet	34082-D2
34.4915	-82.2287	168.1	35	Foliation	Laurens_Thrust_Sheet	34082-D2
34.4933	-82.1775	11.1	90	Foliation	Laurens_Thrust_Sheet	34082-D2
34.4959	-82.1789	0.7	0	Foliation	Laurens_Thrust_Sheet	34082-D2
34.4965	-82.2317	360	0	Bedding	Laurens_Thrust_Sheet	34082-D2
34.4995	-82.1355	130.8	60	Foliation	Laurens_Thrust_Sheet	34082-D2
34.3847	-82.2784	10	50	Foliation	Laurens_Thrust_Sheet	34082-D3
34.3867	-82.2876	11.5	25	Foliation	Laurens_Thrust_Sheet	34082-D3
34.3903	-82.2505	31	45	Foliation	Laurens_Thrust_Sheet	34082-D3
34.3905	-82.3525	35.1	45	Foliation	Laurens_Thrust_Sheet	34082-D3
34.3919	-82.3013	16.2	45	Foliation	Laurens_Thrust_Sheet	34082-D3
34.3969	-82.2663	39.8	35	Foliation	Laurens_Thrust_Sheet	34082-D3
34.3994	-82.3022	352.9	50	Foliation	Laurens_Thrust_Sheet	34082-D3
34.401	-82.2783	2	75	Foliation	Laurens_Thrust_Sheet	34082-D3
34.4017	-82.3098	11.3	50	Foliation	Laurens_Thrust_Sheet	34082-D3
34.4029	-82.3533	79.8	75	Foliation	Laurens_Thrust_Sheet	34082-D3
34.4057	-82.3692	22.9	55	Foliation	Laurens_Thrust_Sheet	34082-D3
34.4072	-82.257	7.3	55	Foliation	Laurens_Thrust_Sheet	34082-D3
34.4087	-82.2922	262.8	25	Foliation	Laurens_Thrust_Sheet	34082-D3
34.4107	-82.2727	345.7	30	Foliation	Laurens_Thrust_Sheet	34082-D3
34.4123	-82.3507	23.2	60	Foliation	Laurens_Thrust_Sheet	34082-D3
34.4125	-82.3546	180	0	Bedding	Laurens_Thrust_Sheet	34082-D3
34.414	-82.3168	34.9	50	Foliation	Laurens_Thrust_Sheet	34082-D3
34.4154	-82.3023	56.5	90	Foliation	Laurens_Thrust_Sheet	34082-D3
34.4165	-82.2542	39.8	45	Foliation	Laurens_Thrust_Sheet	34082-D3
34.419	-82.2887	58.2	90	Foliation	Laurens_Thrust_Sheet	34082-D3
34.4197	-82.274	64.6	90	Foliation	Laurens_Thrust_Sheet	34082-D3
34.4199	-82.3518	19.8	25	Foliation	Laurens_Thrust_Sheet	34082-D3
34.4207	-82.3126	1.1	20	Foliation	Laurens_Thrust_Sheet	34082-D3
34.4223	-82.2594	12	45	Foliation	Laurens_Thrust_Sheet	34082-D3
34.4252	-82.2965	1	55	Foliation	Laurens_Thrust_Sheet	34082-D3
34.4262	-82.2739	17.3	50	Foliation	Laurens_Thrust_Sheet	34082-D3
34.427	-82.3587	34.6	35	Foliation	Laurens_Thrust_Sheet	34082-D3
34.4275	-82.3126	44.4	30	Foliation	Laurens_Thrust_Sheet	34082-D3
34.4283	-82.3527	3.6	50	Foliation	Laurens_Thrust_Sheet	34082-D3
34.4303	-82.3639	29.2	20	Foliation	Laurens_Thrust_Sheet	34082-D3
34.4307	-82.2971	4.5	60	Foliation	Laurens_Thrust_Sheet	34082-D3
34.4349	-82.3001	357.3	55	Foliation	Laurens_Thrust_Sheet	34082-D3
34.4355	-82.3462	360	0	Foliation	Laurens_Thrust_Sheet	34082-D3
34.4384	-82.3134	53.6	55	Foliation	Laurens_Thrust_Sheet	34082-D3
34.4422	-82.3385	33.1	55	Foliation	Laurens_Thrust_Sheet	34082-D3
34.4473	-82.3244	29.2	60	Foliation	Laurens_Thrust_Sheet	34082-D3
34.4498	-82.3659	29.9	90	Foliation	Laurens_Thrust_Sheet	34082-D3
34.4525	-82.3751	21.3	90	Foliation	Paris_Mountain_Thrust_Sheet	34082-D3
34.4561	-82.2608	11.5	25	Foliation	Laurens_Thrust_Sheet	34082-D3
34.4576	-82.3174	14.4	55	Foliation	Laurens_Thrust_Sheet	34082-D3
34.4583	-82.3499	1	50	Foliation	Laurens_Thrust_Sheet	34082-D3
34.4627	-82.3573	359.4	65	Foliation	Laurens_Thrust_Sheet	34082-D3
34.4661	-82.3059	39.2	80	Foliation	Laurens_Thrust_Sheet	34082-D3
34.4672	-82.3252	17.5	55	Foliation	Laurens_Thrust_Sheet	34082-D3
34.4682	-82.3019	24.4	35	Foliation	Laurens_Thrust_Sheet	34082-D3
34.4699	-82.3307	177.5	0	Bedding	Laurens_Thrust_Sheet	34082-D3
34.4701	-82.2664	346.7	20	Foliation	Laurens_Thrust_Sheet	34082-D3
34.471	-82.363	360	35	Foliation	Paris_Mountain_Thrust_Sheet	34082-D3
34.4752	-82.2851	15.9	45	Foliation	Laurens_Thrust_Sheet	34082-D3
34.4756	-82.3344	17.9	30	Foliation	Laurens_Thrust_Sheet	34082-D3
34.4765	-82.3553	4	30	Foliation	Paris_Mountain_Thrust_Sheet	34082-D3
34.4779	-82.3694	354	50	Foliation	Paris_Mountain_Thrust_Sheet	34082-D3
34.4784	-82.3226	350.5	90	Foliation	Laurens_Thrust_Sheet	34082-D3
34.4787	-82.3012	315.5	25	Foliation	Laurens_Thrust_Sheet	34082-D3
34.4791	-82.3507	4.9	70	Foliation	Laurens_Thrust_Sheet	34082-D3
34.4818	-82.2774	11.3	60	Foliation	Laurens_Thrust_Sheet	34082-D3
34.4847	-82.3267	25.5	45	Foliation	Laurens_Thrust_Sheet	34082-D3
34.4851	-82.255	342	60	Foliation	Laurens_Thrust_Sheet	34082-D3
34.4929	-82.3444	180.7	0	Bedding	Laurens_Thrust_Sheet	34082-D3
34.4938	-82.3523	145.8	90	Foliation	Laurens_Thrust_Sheet	34082-D3
34.4975	-82.3646	24.3	35	Foliation	Paris_Mountain_Thrust_Sheet	34082-D3
34.4982	-82.2621	19.1	65	Foliation	Laurens_Thrust_Sheet	34082-D3
34.4995	-82.2657	27	70	Foliation	Laurens_Thrust_Sheet	34082-D3
34.3766	-82.4952	10.3	45	Foliation	Paris_Mountain_Thrust_Sheet	34082-D4
34.3796	-82.4377	0.4	35	Foliation	Laurens_Thrust_Sheet	34082-D4
34.3803	-82.48	0.5	0	Foliation	Six_Mile_Thrust_Sheet	34082-D4
34.3824	-82.4213	328.6	45	Foliation	Paris_Mountain_Thrust_Sheet	34082-D4
34.3827	-82.4018	17.6	45	Foliation	Paris_Mountain_Thrust_Sheet	34082-D4
34.3828	-82.4607	358.8	0	Foliation	Six_Mile_Thrust_Sheet	34082-D4
34.3865	-82.4927	11.8	60	Foliation	Paris_Mountain_Thrust_Sheet	34082-D4
34.3874	-82.3918	47.9	90	Foliation	Laurens_Thrust_Sheet	34082-D4
34.3883	-82.3831	36.3	75	Foliation	Laurens_Thrust_Sheet	34082-D4
34.3922	-82.4017	354.8	45	Foliation	Paris_Mountain_Thrust_Sheet	34082-D4
34.3984	-82.4912	16.6	70	Foliation	Six_Mile_Thrust_Sheet	34082-D4
34.3994	-82.4652	1.8	65	Foliation	Six_Mile_Thrust_Sheet	34082-D4
34.4037	-82.3982	35.6	50	Foliation	Paris_Mountain_Thrust_Sheet	34082-D4
34.4058	-82.4442	41.3	35	Foliation	Paris_Mountain_Thrust_Sheet	34082-D4
34.4082	-82.4601	15.8	45	Foliation	Paris_Mountain_Thrust_Sheet	34082-D4
34.417	-82.3937	12.9	45	Foliation	Paris_Mountain_Thrust_Sheet	34082-D4
34.4172	-82.3762	21.1	55	Foliation	Laurens_Thrust_Sheet	34082-D4
34.4242	-82.4524	28	50	Foliation	Paris_Mountain_Thrust_Sheet	34082-D4
34.4324	-82.4528	355.9	45	Foliation	Paris_Mountain_Thrust_Sheet	34082-D4
34.4327	-82.4818	53.4	50	Foliation	Six_Mile_Thrust_Sheet	34082-D4
34.4417	-82.4304	358.1	70	Foliation	Paris_Mountain_Thrust_Sheet	34082-D4
34.4438	-82.4938	325.8	45	Foliation	Six_Mile_Thrust_Sheet	34082-D4
34.4456	-82.4592	18.5	55	Foliation	Six_Mile_Thrust_Sheet	34082-D4
34.4491	-82.3912	357.9	35	Foliation	Paris_Mountain_Thrust_Sheet	34082-D4
34.4494	-82.4995	20.6	45	Foliation	Six_Mile_Thrust_Sheet	34082-D4
34.4527	-82.4276	360	0	Foliation	Paris_Mountain_Thrust_Sheet	34082-D4
34.454	-82.4536	345.5	45	Foliation	Paris_Mountain_Thrust_Sheet	34082-D4
34.455	-82.4181	26.8	50	Foliation	Paris_Mountain_Thrust_Sheet	34082-D4
34.4551	-82.4847	183.3	50	Foliation	Six_Mile_Thrust_Sheet	34082-D4
34.4613	-82.4289	270	20	Foliation	Paris_Mountain_Thrust_Sheet	34082-D4
34.4645	-82.3985	27.8	60	Foliation	Paris_Mountain_Thrust_Sheet	34082-D4
34.4667	-82.3886	13.7	45	Foliation	Paris_Mountain_Thrust_Sheet	34082-D4
34.4674	-82.3775	36.1	65	Foliation	Paris_Mountain_Thrust_Sheet	34082-D4
34.4685	-82.4432	24.3	45	Foliation	Paris_Mountain_Thrust_Sheet	34082-D4
34.4697	-82.4151	181.6	0	Bedding	Paris_Mountain_Thrust_Sheet	34082-D4
34.4702	-82.4904	29.8	65	Foliation	Six_Mile_Thrust_Sheet	34082-D4
34.4703	-82.4777	1.7	0	Bedding	Six_Mile_Thrust_Sheet	34082-D4
34.4704	-82.3989	15.8	50	Foliation	Paris_Mountain_Thrust_Sheet	34082-D4
34.472	-82.3786	330.7	65	Foliation	Paris_Mountain_Thrust_Sheet	34082-D4
34.4735	-82.421	41.4	45	Foliation	Paris_Mountain_Thrust_Sheet	34082-D4
34.474	-82.4309	360	90	Foliation	Paris_Mountain_Thrust_Sheet	34082-D4
34.4767	-82.4438	347.1	90	Foliation	Paris_Mountain_Thrust_Sheet	34082-D4
34.4807	-82.4924	40	65	Foliation	Six_Mile_Thrust_Sheet	34082-D4
34.4812	-82.3841	8.8	55	Foliation	Paris_Mountain_Thrust_Sheet	34082-D4
34.4817	-82.4108	360	60	Foliation	Paris_Mountain_Thrust_Sheet	34082-D4
34.484	-82.4661	4.4	70	Foliation	Six_Mile_Thrust_Sheet	34082-D4
34.4872	-82.4449	357.2	0	Foliation	Paris_Mountain_Thrust_Sheet	34082-D4
34.4874	-82.4106	57.9	45	Foliation	Paris_Mountain_Thrust_Sheet	34082-D4
34.4894	-82.3887	4.5	70	Foliation	Paris_Mountain_Thrust_Sheet	34082-D4
34.4906	-82.4278	27.8	90	Foliation	Paris_Mountain_Thrust_Sheet	34082-D4
34.4929	-82.49	23.7	70	Foliation	Six_Mile_Thrust_Sheet	34082-D4
34.4941	-82.4522	1.4	70	Foliation	Six_Mile_Thrust_Sheet	34082-D4
34.4961	-82.4755	359.3	75	Foliation	Six_Mile_Thrust_Sheet	34082-D4
34.4979	-82.3891	24.5	90	Foliation	Paris_Mountain_Thrust_Sheet	34082-D4
34.377	-82.5512	298.9	50	Foliation	Six_Mile_Thrust_Sheet	34082-D5
34.3787	-82.5597	11.1	40	Foliation	Six_Mile_Thrust_Sheet	34082-D5
34.379	-82.5212	151	21	Foliation	Six_Mile_Thrust_Sheet	34082-D5
34.381	-82.5677	34.2	25	Foliation	Six_Mile_Thrust_Sheet	34082-D5
34.3824	-82.5903	23.5	34	Foliation	Six_Mile_Thrust_Sheet	34082-D5
34.3835	-82.5141	110.1	32	Foliation	Six_Mile_Thrust_Sheet	34082-D5
34.3842	-82.5458	6.7	17	Foliation	Six_Mile_Thrust_Sheet	34082-D5
34.3844	-82.5951	17.5	50	Foliation	Six_Mile_Thrust_Sheet	34082-D5
34.3849	-82.5792	11	16	Foliation	Six_Mile_Thrust_Sheet	34082-D5
34.4001	-82.5437	51.9	42	Foliation	Six_Mile_Thrust_Sheet	34082-D5
34.4017	-82.5874	71	27	Foliation	Six_Mile_Thrust_Sheet	34082-D5
34.4018	-82.5409	330.3	23	Foliation	Six_Mile_Thrust_Sheet	34082-D5
34.4027	-82.5801	40.2	32	Foliation	Six_Mile_Thrust_Sheet	34082-D5
34.4032	-82.5667	306.7	15	Foliation	Six_Mile_Thrust_Sheet	34082-D5
34.4044	-82.5704	137.7	17	Foliation	Six_Mile_Thrust_Sheet	34082-D5
34.4079	-82.5478	10.1	22	Foliation	Six_Mile_Thrust_Sheet	34082-D5
34.4123	-82.5384	48.2	15	Foliation	Six_Mile_Thrust_Sheet	34082-D5
34.4129	-82.6123	37.9	12	Foliation	Six_Mile_Thrust_Sheet	34082-D5
34.4155	-82.5319	328	12	Foliation	Six_Mile_Thrust_Sheet	34082-D5
34.4162	-82.5809	42.9	36	Foliation	Six_Mile_Thrust_Sheet	34082-D5
34.4235	-82.5862	255.5	19	Foliation	Six_Mile_Thrust_Sheet	34082-D5
34.4236	-82.5012	0.8	22	Foliation	Six_Mile_Thrust_Sheet	34082-D5
34.4249	-82.5917	37.2	44	Foliation	Six_Mile_Thrust_Sheet	34082-D5
34.4267	-82.62	197.5	24	Foliation	Six_Mile_Thrust_Sheet	34082-D5
34.4275	-82.507	56.3	51	Foliation	Six_Mile_Thrust_Sheet	34082-D5
34.4275	-82.5187	2.8	27	Foliation	Six_Mile_Thrust_Sheet	34082-D5
34.4279	-82.5668	33.5	31	Foliation	Six_Mile_Thrust_Sheet	34082-D5
34.4335	-82.6186	144.8	34	Foliation	Six_Mile_Thrust_Sheet	34082-D5
34.434	-82.5189	17.7	44	Foliation	Six_Mile_Thrust_Sheet	34082-D5
34.4382	-82.5274	12.2	33	Foliation	Six_Mile_Thrust_Sheet	34082-D5
34.44	-82.5329	69.6	28	Foliation	Six_Mile_Thrust_Sheet	34082-D5
34.4414	-82.6191	244.2	31	Foliation	Six_Mile_Thrust_Sheet	34082-D5
34.4425	-82.5034	7.6	26	Foliation	Six_Mile_Thrust_Sheet	34082-D5
34.443	-82.5124	47.5	44	Foliation	Six_Mile_Thrust_Sheet	34082-D5
34.4438	-82.5504	74.7	57	Foliation	Six_Mile_Thrust_Sheet	34082-D5
34.4462	-82.6241	12.1	12	Foliation	Six_Mile_Thrust_Sheet	34082-D5
34.4463	-82.5373	58.1	44	Foliation	Six_Mile_Thrust_Sheet	34082-D5
34.448	-82.5877	15.5	18	Foliation	Six_Mile_Thrust_Sheet	34082-D5
34.4481	-82.5787	74	24	Foliation	Six_Mile_Thrust_Sheet	34082-D5
34.4484	-82.6015	212	10	Foliation	Six_Mile_Thrust_Sheet	34082-D5
34.4497	-82.525	42.8	56	Foliation	Six_Mile_Thrust_Sheet	34082-D5
34.4536	-82.5096	50.9	43	Foliation	Six_Mile_Thrust_Sheet	34082-D5
34.4577	-82.5923	56.5	29	Foliation	Six_Mile_Thrust_Sheet	34082-D5
34.4608	-82.5404	40.5	33	Foliation	Six_Mile_Thrust_Sheet	34082-D5
34.4609	-82.507	20	24	Foliation	Six_Mile_Thrust_Sheet	34082-D5
34.4611	-82.5162	32.9	29	Foliation	Six_Mile_Thrust_Sheet	34082-D5
34.4618	-82.6035	59.8	28	Foliation	Six_Mile_Thrust_Sheet	34082-D5
34.4629	-82.5863	29	17	Foliation	Six_Mile_Thrust_Sheet	34082-D5
34.4662	-82.6074	20.3	39	Foliation	Six_Mile_Thrust_Sheet	34082-D5
34.4664	-82.5413	52.9	42	Foliation	Six_Mile_Thrust_Sheet	34082-D5
34.4665	-82.5717	9.3	37	Foliation	Six_Mile_Thrust_Sheet	34082-D5
34.4686	-82.5227	101.4	47	Foliation	Six_Mile_Thrust_Sheet	34082-D5
34.4697	-82.5754	79.5	9	Foliation	Six_Mile_Thrust_Sheet	34082-D5
34.4705	-82.5888	62.5	27	Foliation	Six_Mile_Thrust_Sheet	34082-D5
34.4712	-82.5114	66.8	21	Foliation	Six_Mile_Thrust_Sheet	34082-D5
34.4733	-82.5689	17.1	39	Foliation	Six_Mile_Thrust_Sheet	34082-D5
34.4742	-82.615	49.3	555	Foliation	Six_Mile_Thrust_Sheet	34082-D5
34.4766	-82.5876	329.6	34	Foliation	Six_Mile_Thrust_Sheet	34082-D5
34.4778	-82.6083	81	17	Foliation	Six_Mile_Thrust_Sheet	34082-D5
34.4783	-82.5065	30.6	25	Foliation	Six_Mile_Thrust_Sheet	34082-D5
34.4798	-82.5666	277.9	46	Foliation	Six_Mile_Thrust_Sheet	34082-D5
34.4819	-82.5585	17.5	41	Foliation	Six_Mile_Thrust_Sheet	34082-D5
34.4826	-82.5447	139.8	30	Foliation	Six_Mile_Thrust_Sheet	34082-D5
34.4834	-82.5982	47.2	32	Foliation	Six_Mile_Thrust_Sheet	34082-D5
34.4858	-82.5138	72	37	Foliation	Six_Mile_Thrust_Sheet	34082-D5
34.4873	-82.5827	71.9	23	Foliation	Six_Mile_Thrust_Sheet	34082-D5
34.4884	-82.5516	22.8	46	Foliation	Six_Mile_Thrust_Sheet	34082-D5
34.4894	-82.5161	15	18	Foliation	Six_Mile_Thrust_Sheet	34082-D5
34.4928	-82.5101	349	37	Foliation	Six_Mile_Thrust_Sheet	34082-D5
34.4934	-82.5707	22.6	15	Foliation	Six_Mile_Thrust_Sheet	34082-D5
34.4937	-82.5905	50.9	32	Foliation	Six_Mile_Thrust_Sheet	34082-D5
34.4946	-82.5974	196.2	44	Foliation	Six_Mile_Thrust_Sheet	34082-D5
34.4984	-82.5753	251.4	27	Foliation	Six_Mile_Thrust_Sheet	34082-D5
34.3749	-82.6372	137.6	38	Foliation	Six_Mile_Thrust_Sheet	34082-D6
34.3785	-82.6932	146.3	15	Foliation	Six_Mile_Thrust_Sheet	34082-D6
34.3785	-82.7056	63.4	35	Foliation	Six_Mile_Thrust_Sheet	34082-D6
34.3817	-82.7431	126	86	Foliation	Six_Mile_Thrust_Sheet	34082-D6
34.382	-82.7155	66.1	18	Foliation	Six_Mile_Thrust_Sheet	34082-D6
34.3838	-82.6582	122	25	Foliation	Six_Mile_Thrust_Sheet	34082-D6
34.3885	-82.6365	322.3	15	Foliation	Six_Mile_Thrust_Sheet	34082-D6
34.3887	-82.6998	282.2	34	Foliation	Six_Mile_Thrust_Sheet	34082-D6
34.3887	-82.7201	61.7	22	Foliation	Six_Mile_Thrust_Sheet	34082-D6
34.3922	-82.6533	293.7	43	Foliation	Six_Mile_Thrust_Sheet	34082-D6
34.3933	-82.6271	100.1	42	Foliation	Six_Mile_Thrust_Sheet	34082-D6
34.4007	-82.7064	13.5	17	Foliation	Six_Mile_Thrust_Sheet	34082-D6
34.4021	-82.6408	9.6	11	Foliation	Six_Mile_Thrust_Sheet	34082-D6
34.4042	-82.7311	48.6	31	Foliation	Six_Mile_Thrust_Sheet	34082-D6
34.4078	-82.6961	64.5	50	Foliation	Six_Mile_Thrust_Sheet	34082-D6
34.4084	-82.6608	101.3	25	Foliation	Six_Mile_Thrust_Sheet	34082-D6
34.4101	-82.7446	32	40	Foliation	Six_Mile_Thrust_Sheet	34082-D6
34.4133	-82.6327	2.6	6	Foliation	Six_Mile_Thrust_Sheet	34082-D6
34.4147	-82.7112	49.7	61	Foliation	Six_Mile_Thrust_Sheet	34082-D6
34.4198	-82.6353	7.5	38	Foliation	Six_Mile_Thrust_Sheet	34082-D6
34.4215	-82.694	66.7	43	Foliation	Six_Mile_Thrust_Sheet	34082-D6
34.4217	-82.6808	99.7	16	Foliation	Six_Mile_Thrust_Sheet	34082-D6
34.4284	-82.7211	37.3	38	Foliation	Six_Mile_Thrust_Sheet	34082-D6
34.4295	-82.6684	70.5	37	Foliation	Six_Mile_Thrust_Sheet	34082-D6
34.4355	-82.7317	3.7	36	Foliation	Six_Mile_Thrust_Sheet	34082-D6
34.4356	-82.661	358.6	33	Foliation	Six_Mile_Thrust_Sheet	34082-D6
34.4362	-82.6274	84.8	19	Foliation	Six_Mile_Thrust_Sheet	34082-D6
34.4424	-82.7199	59.5	40	Foliation	Six_Mile_Thrust_Sheet	34082-D6
34.4456	-82.7024	74.1	40	Foliation	Six_Mile_Thrust_Sheet	34082-D6
34.447	-82.6462	2.8	34	Foliation	Six_Mile_Thrust_Sheet	34082-D6
34.4496	-82.6273	72.4	31	Foliation	Six_Mile_Thrust_Sheet	34082-D6
34.4509	-82.6957	40.1	32	Foliation	Six_Mile_Thrust_Sheet	34082-D6
34.4518	-82.7303	343.4	29	Foliation	Six_Mile_Thrust_Sheet	34082-D6
34.4523	-82.6361	88	25	Foliation	Six_Mile_Thrust_Sheet	34082-D6
34.455	-82.7052	37.2	25	Foliation	Six_Mile_Thrust_Sheet	34082-D6
34.4591	-82.6895	66	24	Foliation	Six_Mile_Thrust_Sheet	34082-D6
34.4615	-82.6379	323.5	21	Foliation	Six_Mile_Thrust_Sheet	34082-D6
34.4617	-82.6289	31.5	53	Foliation	Six_Mile_Thrust_Sheet	34082-D6
34.4661	-82.6402	63.9	31	Foliation	Six_Mile_Thrust_Sheet	34082-D6
34.4662	-82.63	143.1	47	Foliation	Six_Mile_Thrust_Sheet	34082-D6
34.4669	-82.7295	13.1	17	Foliation	Six_Mile_Thrust_Sheet	34082-D6
34.4675	-82.6809	360	71	Foliation	Six_Mile_Thrust_Sheet	34082-D6
34.4701	-82.706	172.4	22	Foliation	Six_Mile_Thrust_Sheet	34082-D6
34.4729	-82.6959	97	24	Foliation	Six_Mile_Thrust_Sheet	34082-D6
34.4729	-82.6332	21.3	73	Foliation	Six_Mile_Thrust_Sheet	34082-D6
34.4742	-82.6676	11.3	40	Foliation	Six_Mile_Thrust_Sheet	34082-D6
34.4747	-82.6549	2.7	58	Foliation	Six_Mile_Thrust_Sheet	34082-D6
34.4758	-82.7192	13.6	33	Foliation	Six_Mile_Thrust_Sheet	34082-D6
34.48	-82.7023	341.5	22	Foliation	Six_Mile_Thrust_Sheet	34082-D6
34.4805	-82.6579	331.3	19	Foliation	Six_Mile_Thrust_Sheet	34082-D6
34.4806	-82.7304	328.7	70	Foliation	Six_Mile_Thrust_Sheet	34082-D6
34.4827	-82.7242	3.4	23	Foliation	Six_Mile_Thrust_Sheet	34082-D6
34.4829	-82.6323	51.1	27	Foliation	Six_Mile_Thrust_Sheet	34082-D6
34.4838	-82.7095	303.8	22	Foliation	Six_Mile_Thrust_Sheet	34082-D6
34.4855	-82.6687	4	54	Foliation	Six_Mile_Thrust_Sheet	34082-D6
34.488	-82.6834	326.3	33	Foliation	Six_Mile_Thrust_Sheet	34082-D6
34.489	-82.7429	246.3	31	Foliation	Six_Mile_Thrust_Sheet	34082-D6
34.4898	-82.6539	27.9	48	Foliation	Six_Mile_Thrust_Sheet	34082-D6
34.4903	-82.6942	24.3	46	Foliation	Six_Mile_Thrust_Sheet	34082-D6
34.4911	-82.715	344.9	25	Foliation	Six_Mile_Thrust_Sheet	34082-D6
34.4924	-82.6272	234.3	33	Foliation	Six_Mile_Thrust_Sheet	34082-D6
34.493	-82.6981	186.3	17	Foliation	Six_Mile_Thrust_Sheet	34082-D6
34.4937	-82.6617	50.6	23	Foliation	Six_Mile_Thrust_Sheet	34082-D6
34.495	-82.6781	10.7	35	Foliation	Six_Mile_Thrust_Sheet	34082-D6
34.4961	-82.714	276.8	26	Foliation	Six_Mile_Thrust_Sheet	34082-D6
34.3757	-82.8156	168.4	38	Foliation	Six_Mile_Thrust_Sheet	34082-D7
34.3775	-82.7894	5.8	80	Foliation	Six_Mile_Thrust_Sheet	34082-D7
34.3811	-82.753	70.4	30	Foliation	Six_Mile_Thrust_Sheet	34082-D7
34.3819	-82.7834	359.1	31	Foliation	Six_Mile_Thrust_Sheet	34082-D7
34.3865	-82.7659	102.7	45	Foliation	Six_Mile_Thrust_Sheet	34082-D7
34.3865	-82.7884	142.5	61	Foliation	Six_Mile_Thrust_Sheet	34082-D7
34.3884	-82.7962	139.5	62	Foliation	Six_Mile_Thrust_Sheet	34082-D7
34.3889	-82.825	42.8	33	Foliation	Six_Mile_Thrust_Sheet	34082-D7
34.3894	-82.8041	149.3	50	Foliation	Six_Mile_Thrust_Sheet	34082-D7
34.3922	-82.7659	201.5	33	Foliation	Six_Mile_Thrust_Sheet	34082-D7
34.394	-82.8103	188.4	71	Foliation	Six_Mile_Thrust_Sheet	34082-D7
34.3942	-82.8165	162	45	Foliation	Six_Mile_Thrust_Sheet	34082-D7
34.3965	-82.7905	66.5	12	Foliation	Six_Mile_Thrust_Sheet	34082-D7
34.4018	-82.8142	67.8	19	Foliation	Six_Mile_Thrust_Sheet	34082-D7
34.4092	-82.7506	31	78	Foliation	Six_Mile_Thrust_Sheet	34082-D7
34.4104	-82.7856	21.2	33	Foliation	Six_Mile_Thrust_Sheet	34082-D7
34.4127	-82.8096	54	19	Foliation	Six_Mile_Thrust_Sheet	34082-D7
34.4128	-82.8653	114.6	50	Foliation	Six_Mile_Thrust_Sheet	34082-D7
34.4191	-82.7577	7.7	84	Foliation	Six_Mile_Thrust_Sheet	34082-D7
34.4196	-82.7787	81.5	33	Foliation	Six_Mile_Thrust_Sheet	34082-D7
34.4199	-82.7651	45.6	37	Foliation	Six_Mile_Thrust_Sheet	34082-D7
34.4209	-82.8151	62	58	Foliation	Six_Mile_Thrust_Sheet	34082-D7
34.4229	-82.8229	183.4	27	Foliation	Six_Mile_Thrust_Sheet	34082-D7
34.4247	-82.7681	84.7	69	Foliation	Six_Mile_Thrust_Sheet	34082-D7
34.4265	-82.7953	230.6	76	Foliation	Six_Mile_Thrust_Sheet	34082-D7
34.4308	-82.755	114	79	Foliation	Six_Mile_Thrust_Sheet	34082-D7
34.4311	-82.8049	151.8	59	Foliation	Six_Mile_Thrust_Sheet	34082-D7
34.4328	-82.7957	3.6	86	Foliation	Six_Mile_Thrust_Sheet	34082-D7
34.4332	-82.8689	86.2	36	Foliation	Six_Mile_Thrust_Sheet	34082-D7
34.435	-82.76	121.4	28	Foliation	Six_Mile_Thrust_Sheet	34082-D7
34.4355	-82.8406	162.5	22	Foliation	Six_Mile_Thrust_Sheet	34082-D7
34.4466	-82.8408	49.4	39	Foliation	Six_Mile_Thrust_Sheet	34082-D7
34.4468	-82.7621	123.1	68	Foliation	Six_Mile_Thrust_Sheet	34082-D7
34.4484	-82.7945	333.4	69	Foliation	Six_Mile_Thrust_Sheet	34082-D7
34.4488	-82.7826	48	21	Foliation	Six_Mile_Thrust_Sheet	34082-D7
34.4488	-82.8293	55.6	18	Foliation	Six_Mile_Thrust_Sheet	34082-D7
34.4519	-82.818	134.4	11	Foliation	Six_Mile_Thrust_Sheet	34082-D7
34.4528	-82.7673	210.7	66	Foliation	Six_Mile_Thrust_Sheet	34082-D7
34.4594	-82.7512	6.4	64	Foliation	Six_Mile_Thrust_Sheet	34082-D7
34.4602	-82.7722	145.4	17	Foliation	Six_Mile_Thrust_Sheet	34082-D7
34.4624	-82.7858	64.4	21	Foliation	Six_Mile_Thrust_Sheet	34082-D7
34.4626	-82.8104	290.1	32	Foliation	Six_Mile_Thrust_Sheet	34082-D7
34.4694	-82.7627	353	58	Foliation	Six_Mile_Thrust_Sheet	34082-D7
34.4694	-82.8007	183.3	17	Foliation	Six_Mile_Thrust_Sheet	34082-D7
34.47	-82.7719	73.6	50	Foliation	Six_Mile_Thrust_Sheet	34082-D7
34.4725	-82.7869	145	22	Foliation	Six_Mile_Thrust_Sheet	34082-D7
34.4748	-82.8155	159	19	Foliation	Six_Mile_Thrust_Sheet	34082-D7
34.4782	-82.786	172.2	48	Foliation	Six_Mile_Thrust_Sheet	34082-D7
34.4815	-82.8014	328.1	23	Foliation	Six_Mile_Thrust_Sheet	34082-D7
34.4823	-82.809	167.9	25	Foliation	Six_Mile_Thrust_Sheet	34082-D7
34.4911	-82.8647	21.2	26	Foliation	Six_Mile_Thrust_Sheet	34082-D7
34.4914	-82.7636	225.3	38	Foliation	Six_Mile_Thrust_Sheet	34082-D7
34.4916	-82.7772	255.3	64	Foliation	Six_Mile_Thrust_Sheet	34082-D7
34.4945	-82.8592	29.6	29	Foliation	Six_Mile_Thrust_Sheet	34082-D7
34.4973	-82.773	15.5	33	Foliation	Six_Mile_Thrust_Sheet	34082-D7
34.4981	-82.7852	299.9	44	Foliation	Six_Mile_Thrust_Sheet	34082-D7
34.4986	-82.871	347.7	16	Foliation	Six_Mile_Thrust_Sheet	34082-D7
34.3775	-82.9601	94.5	23	Foliation	Six_Mile_Thrust_Sheet	34082-D8
34.3811	-82.981	117.3	50	Foliation	Six_Mile_Thrust_Sheet	34082-D8
34.382	-82.9086	24.1	32	Foliation	Six_Mile_Thrust_Sheet	34082-D8
34.3847	-82.961	56.9	16	Foliation	Six_Mile_Thrust_Sheet	34082-D8
34.3855	-82.8904	27.6	24	Foliation	Six_Mile_Thrust_Sheet	34082-D8
34.3899	-82.9688	82.3	40	Foliation	Six_Mile_Thrust_Sheet	34082-D8
34.3906	-82.9371	49.8	46	Foliation	Six_Mile_Thrust_Sheet	34082-D8
34.3912	-82.9859	33.6	25	Foliation	Six_Mile_Thrust_Sheet	34082-D8
34.3987	-82.9431	96.2	31	Foliation	Six_Mile_Thrust_Sheet	34082-D8
34.4013	-82.8906	81.5	30	Foliation	Six_Mile_Thrust_Sheet	34082-D8
34.4075	-82.9972	42.6	25	Foliation	Chauga_Walhalla_Thrust_Sheet	34082-D8
34.4092	-82.9645	103.4	10	Foliation	Six_Mile_Thrust_Sheet	34082-D8
34.4103	-82.9076	1.5	10	Foliation	Six_Mile_Thrust_Sheet	34082-D8
34.413	-82.9313	70.3	31	Foliation	Six_Mile_Thrust_Sheet	34082-D8
34.4183	-82.9527	265.1	16	Foliation	Six_Mile_Thrust_Sheet	34082-D8
34.4231	-82.9675	54.3	47	Foliation	Six_Mile_Thrust_Sheet	34082-D8
34.4243	-82.9249	21.4	43	Foliation	Six_Mile_Thrust_Sheet	34082-D8
34.4244	-82.8814	166.3	17	Foliation	Six_Mile_Thrust_Sheet	34082-D8
34.4283	-82.9772	45	17	Foliation	Chauga_Walhalla_Thrust_Sheet	34082-D8
34.429	-82.9037	59.8	23	Foliation	Six_Mile_Thrust_Sheet	34082-D8
34.4296	-82.9507	60.7	43	Foliation	Six_Mile_Thrust_Sheet	34082-D8
34.4313	-82.9947	86.1	33	Foliation	Chauga_Walhalla_Thrust_Sheet	34082-D8
34.4325	-82.9369	54.2	35	Foliation	Six_Mile_Thrust_Sheet	34082-D8
34.4367	-82.889	358.5	46	Foliation	Six_Mile_Thrust_Sheet	34082-D8
34.4373	-82.9178	39.3	23	Foliation	Six_Mile_Thrust_Sheet	34082-D8
34.4395	-82.9924	74.9	12	Foliation	Chauga_Walhalla_Thrust_Sheet	34082-D8
34.4403	-82.8768	56	19	Foliation	Six_Mile_Thrust_Sheet	34082-D8
34.4457	-82.9272	61.7	32	Foliation	Six_Mile_Thrust_Sheet	34082-D8
34.4457	-82.9578	354.9	11	Foliation	Six_Mile_Thrust_Sheet	34082-D8
34.4462	-82.9944	78.6	10	Foliation	Chauga_Walhalla_Thrust_Sheet	34082-D8
34.4489	-82.8899	274.8	22	Foliation	Six_Mile_Thrust_Sheet	34082-D8
34.4497	-82.968	225	10	Foliation	Six_Mile_Thrust_Sheet	34082-D8
34.4544	-82.8848	39.7	20	Foliation	Six_Mile_Thrust_Sheet	34082-D8
34.4548	-82.9399	28	14	Foliation	Six_Mile_Thrust_Sheet	34082-D8
34.4566	-82.9866	264.5	34	Foliation	Chauga_Walhalla_Thrust_Sheet	34082-D8
34.4566	-82.9537	28.5	25	Foliation	Six_Mile_Thrust_Sheet	34082-D8
34.4594	-82.918	145.7	14	Foliation	Six_Mile_Thrust_Sheet	34082-D8
34.4602	-82.903	58	27	Foliation	Six_Mile_Thrust_Sheet	34082-D8
34.4657	-82.9604	214.2	48	Foliation	Six_Mile_Thrust_Sheet	34082-D8
34.468	-82.9426	359.5	29	Foliation	Six_Mile_Thrust_Sheet	34082-D8
34.4741	-82.9088	333.6	37	Foliation	Six_Mile_Thrust_Sheet	34082-D8
34.4833	-82.8919	11.5	14	Foliation	Six_Mile_Thrust_Sheet	34082-D8
34.4856	-82.8876	319.8	9	Foliation	Six_Mile_Thrust_Sheet	34082-D8
34.486	-82.88	339.1	50	Foliation	Six_Mile_Thrust_Sheet	34082-D8
34.4888	-82.918	227	17	Foliation	Six_Mile_Thrust_Sheet	34082-D8
34.4923	-82.894	36.4	39	Foliation	Six_Mile_Thrust_Sheet	34082-D8
34.4929	-82.9293	272.2	43	Foliation	Six_Mile_Thrust_Sheet	34082-D8
34.4934	-82.9014	208.1	13	Foliation	Six_Mile_Thrust_Sheet	34082-D8
34.4944	-82.9726	265.7	10	Foliation	Six_Mile_Thrust_Sheet	34082-D8
34.4972	-82.9138	239.9	24	Foliation	Six_Mile_Thrust_Sheet	34082-D8
34.5	-82.0426	351.7	90	Foliation	Laurens_Thrust_Sheet	34082-E1
34.5018	-82.0553	30.5	35	Foliation	Laurens_Thrust_Sheet	34082-E1
34.5019	-82.0758	23	90	Foliation	Laurens_Thrust_Sheet	34082-E1
34.5035	-82.1064	8.2	90	Foliation	Laurens_Thrust_Sheet	34082-E1
34.5046	-82.0043	24.8	45	Foliation	Laurens_Thrust_Sheet	34082-E1
34.5055	-82.0216	333.8	90	Foliation	Laurens_Thrust_Sheet	34082-E1
34.5081	-82.0584	54.3	50	Foliation	Laurens_Thrust_Sheet	34082-E1
34.5086	-82.0155	22.3	35	Foliation	Laurens_Thrust_Sheet	34082-E1
34.5092	-82.0976	354	90	Foliation	Laurens_Thrust_Sheet	34082-E1
34.5176	-82.1097	78.2	30	Foliation	Laurens_Thrust_Sheet	34082-E1
34.519	-82.0599	19.1	45	Foliation	Laurens_Thrust_Sheet	34082-E1
34.5215	-82.0823	0.6	0	Foliation	Laurens_Thrust_Sheet	34082-E1
34.5223	-82.0112	341.7	45	Foliation	Laurens_Thrust_Sheet	34082-E1
34.526	-82.022	34.4	50	Foliation	Laurens_Thrust_Sheet	34082-E1
34.5298	-82.0681	1.2	50	Foliation	Laurens_Thrust_Sheet	34082-E1
34.5307	-82.0416	47.4	35	Foliation	Laurens_Thrust_Sheet	34082-E1
34.5333	-82.1066	20.4	20	Foliation	Laurens_Thrust_Sheet	34082-E1
34.5342	-82.0526	14.6	40	Foliation	Laurens_Thrust_Sheet	34082-E1
34.5396	-82.1056	359.6	0	Foliation	Laurens_Thrust_Sheet	34082-E1
34.5432	-82.0514	6.8	90	Foliation	Laurens_Thrust_Sheet	34082-E1
34.5442	-82.076	5.9	30	Foliation	Laurens_Thrust_Sheet	34082-E1
34.545	-82.1155	17.7	65	Foliation	Laurens_Thrust_Sheet	34082-E1
34.5481	-82.0935	359.3	0	Foliation	Laurens_Thrust_Sheet	34082-E1
34.5529	-82.0667	49.3	20	Foliation	Laurens_Thrust_Sheet	34082-E1
34.5547	-82.0831	10.3	30	Foliation	Laurens_Thrust_Sheet	34082-E1
34.5566	-82.0058	32.2	55	Foliation	Laurens_Thrust_Sheet	34082-E1
34.5576	-82.1098	47	40	Foliation	Laurens_Thrust_Sheet	34082-E1
34.5592	-82.0983	357.4	65	Foliation	Laurens_Thrust_Sheet	34082-E1
34.5631	-82.1098	4.2	90	Foliation	Laurens_Thrust_Sheet	34082-E1
34.5668	-82.0294	10.7	60	Foliation	Laurens_Thrust_Sheet	34082-E1
34.5702	-82.0006	30.8	70	Foliation	Laurens_Thrust_Sheet	34082-E1
34.5711	-82.0257	22.8	20	Foliation	Laurens_Thrust_Sheet	34082-E1
34.5742	-82.0545	1	0	Foliation	Laurens_Thrust_Sheet	34082-E1
34.5816	-82.0524	34.6	65	Foliation	Laurens_Thrust_Sheet	34082-E1
34.5859	-82.0357	42.2	45	Foliation	Laurens_Thrust_Sheet	34082-E1
34.5902	-82.1215	12.8	90	Foliation	Laurens_Thrust_Sheet	34082-E1
34.5918	-82.0601	32.3	75	Foliation	Laurens_Thrust_Sheet	34082-E1
34.5945	-82.0365	312.9	80	Foliation	Laurens_Thrust_Sheet	34082-E1
34.5976	-82.0134	305.5	70	Foliation	Laurens_Thrust_Sheet	34082-E1
34.6033	-82.0399	22.9	55	Foliation	Laurens_Thrust_Sheet	34082-E1
34.6074	-82.0468	27.5	75	Foliation	Laurens_Thrust_Sheet	34082-E1
34.6091	-82.1229	360	90	Foliation	Laurens_Thrust_Sheet	34082-E1
34.6144	-82.0638	16.9	80	Foliation	Laurens_Thrust_Sheet	34082-E1
34.6162	-82.1021	360	0	Foliation	Laurens_Thrust_Sheet	34082-E1
34.6175	-82.0194	46.7	90	Foliation	Laurens_Thrust_Sheet	34082-E1
34.6175	-82.0194	75	90	Foliation	Laurens_Thrust_Sheet	34082-E1
34.6179	-82.0725	31.6	90	Foliation	Laurens_Thrust_Sheet	34082-E1
34.6179	-82.0788	359.5	90	Foliation	Laurens_Thrust_Sheet	34082-E1
34.5045	-82.2309	267.3	90	Foliation	Laurens_Thrust_Sheet	34082-E2
34.5049	-82.1456	182.4	60	Foliation	Laurens_Thrust_Sheet	34082-E2
34.505	-82.1876	6.3	70	Foliation	Laurens_Thrust_Sheet	34082-E2
34.5101	-82.2371	357	35	Foliation	Laurens_Thrust_Sheet	34082-E2
34.5113	-82.1935	152.5	90	Foliation	Laurens_Thrust_Sheet	34082-E2
34.5159	-82.1679	29.1	50	Foliation	Laurens_Thrust_Sheet	34082-E2
34.5188	-82.2379	38.9	50	Foliation	Laurens_Thrust_Sheet	34082-E2
34.5206	-82.1461	80.7	50	Foliation	Laurens_Thrust_Sheet	34082-E2
34.5235	-82.1535	23	15	Foliation	Laurens_Thrust_Sheet	34082-E2
34.5254	-82.1323	44.3	90	Foliation	Laurens_Thrust_Sheet	34082-E2
34.5258	-82.195	331.8	65	Foliation	Laurens_Thrust_Sheet	34082-E2
34.5283	-82.221	357.9	0	Foliation	Laurens_Thrust_Sheet	34082-E2
34.5403	-82.149	359.5	0	Foliation	Laurens_Thrust_Sheet	34082-E2
34.541	-82.1674	25.6	90	Foliation	Laurens_Thrust_Sheet	34082-E2
34.5417	-82.131	0.3	0	Foliation	Laurens_Thrust_Sheet	34082-E2
34.5443	-82.1752	353.1	90	Foliation	Laurens_Thrust_Sheet	34082-E2
34.5468	-82.1597	12.2	90	Foliation	Laurens_Thrust_Sheet	34082-E2
34.5486	-82.1895	360	45	Foliation	Laurens_Thrust_Sheet	34082-E2
34.5488	-82.2042	358.1	90	Foliation	Laurens_Thrust_Sheet	34082-E2
34.5493	-82.1553	36.3	90	Foliation	Laurens_Thrust_Sheet	34082-E2
34.5495	-82.225	351	90	Foliation	Laurens_Thrust_Sheet	34082-E2
34.5515	-82.1486	37.3	90	Foliation	Laurens_Thrust_Sheet	34082-E2
34.5516	-82.1297	2.1	0	Foliation	Laurens_Thrust_Sheet	34082-E2
34.5597	-82.1432	16.9	90	Foliation	Laurens_Thrust_Sheet	34082-E2
34.562	-82.1345	30.8	60	Foliation	Laurens_Thrust_Sheet	34082-E2
34.5664	-82.2048	4.1	60	Foliation	Laurens_Thrust_Sheet	34082-E2
34.5676	-82.1489	2.2	45	Foliation	Laurens_Thrust_Sheet	34082-E2
34.5705	-82.2177	314.3	50	Foliation	Laurens_Thrust_Sheet	34082-E2
34.5718	-82.2073	13.9	65	Foliation	Laurens_Thrust_Sheet	34082-E2
34.5736	-82.1544	1.8	0	Foliation	Laurens_Thrust_Sheet	34082-E2
34.5758	-82.1807	358.7	90	Foliation	Laurens_Thrust_Sheet	34082-E2
34.5759	-82.1295	156.5	70	Foliation	Laurens_Thrust_Sheet	34082-E2
34.5827	-82.2455	347.5	70	Foliation	Laurens_Thrust_Sheet	34082-E2
34.5867	-82.1513	360	0	Foliation	Laurens_Thrust_Sheet	34082-E2
34.5876	-82.14	10.4	90	Foliation	Laurens_Thrust_Sheet	34082-E2
34.5884	-82.1741	39.3	55	Foliation	Laurens_Thrust_Sheet	34082-E2
34.5904	-82.223	21	90	Foliation	Laurens_Thrust_Sheet	34082-E2
34.5918	-82.1649	13.1	85	Foliation	Laurens_Thrust_Sheet	34082-E2
34.5932	-82.2177	2	90	Foliation	Laurens_Thrust_Sheet	34082-E2
34.5938	-82.1531	25.2	70	Foliation	Laurens_Thrust_Sheet	34082-E2
34.5938	-82.2491	7.1	90	Foliation	Laurens_Thrust_Sheet	34082-E2
34.5942	-82.2488	185.9	90	Foliation	Laurens_Thrust_Sheet	34082-E2
34.6057	-82.1608	50.4	55	Foliation	Laurens_Thrust_Sheet	34082-E2
34.6079	-82.1707	326.3	60	Foliation	Laurens_Thrust_Sheet	34082-E2
34.6081	-82.182	10	55	Foliation	Laurens_Thrust_Sheet	34082-E2
34.6093	-82.2199	0.6	0	Foliation	Laurens_Thrust_Sheet	34082-E2
34.6107	-82.1382	21.2	40	Foliation	Laurens_Thrust_Sheet	34082-E2
34.6146	-82.142	28.5	90	Foliation	Laurens_Thrust_Sheet	34082-E2
34.6194	-82.151	9.4	45	Foliation	Laurens_Thrust_Sheet	34082-E2
34.6207	-82.2149	1.5	65	Foliation	Laurens_Thrust_Sheet	34082-E2
34.6217	-82.1861	359.1	70	Foliation	Laurens_Thrust_Sheet	34082-E2
34.501	-82.334	14.5	90	Foliation	Laurens_Thrust_Sheet	34082-E3
34.5047	-82.3636	11.1	40	Foliation	Paris_Mountain_Thrust_Sheet	34082-E3
34.5072	-82.3707	55.3	60	Foliation	Paris_Mountain_Thrust_Sheet	34082-E3
34.5073	-82.3117	357.4	0	Foliation	Laurens_Thrust_Sheet	34082-E3
34.5118	-82.3377	7.1	60	Foliation	Laurens_Thrust_Sheet	34082-E3
34.5207	-82.2918	347.3	90	Foliation	Laurens_Thrust_Sheet	34082-E3
34.5233	-82.2775	16.8	90	Foliation	Laurens_Thrust_Sheet	34082-E3
34.5271	-82.264	346.1	90	Foliation	Laurens_Thrust_Sheet	34082-E3
34.5303	-82.3576	322.3	55	Foliation	Paris_Mountain_Thrust_Sheet	34082-E3
34.5375	-82.3472	18.8	90	Foliation	Laurens_Thrust_Sheet	34082-E3
34.5385	-82.2801	356.7	0	Foliation	Laurens_Thrust_Sheet	34082-E3
34.54	-82.3152	359.9	90	Foliation	Laurens_Thrust_Sheet	34082-E3
34.5482	-82.3502	1.6	90	Foliation	Laurens_Thrust_Sheet	34082-E3
34.5521	-82.3672	350.5	65	Foliation	Paris_Mountain_Thrust_Sheet	34082-E3
34.5526	-82.3621	342	25	Foliation	Paris_Mountain_Thrust_Sheet	34082-E3
34.5528	-82.3121	359.2	0	Foliation	Laurens_Thrust_Sheet	34082-E3
34.556	-82.2648	5.6	60	Foliation	Laurens_Thrust_Sheet	34082-E3
34.5625	-82.351	3.9	90	Foliation	Laurens_Thrust_Sheet	34082-E3
34.5653	-82.2679	357.2	0	Bedding	Laurens_Thrust_Sheet	34082-E3
34.5661	-82.3459	11.9	90	Foliation	Laurens_Thrust_Sheet	34082-E3
34.574	-82.353	12.9	90	Foliation	Paris_Mountain_Thrust_Sheet	34082-E3
34.5746	-82.3608	347.8	90	Foliation	Paris_Mountain_Thrust_Sheet	34082-E3
34.5781	-82.3232	356.7	0	Foliation	Laurens_Thrust_Sheet	34082-E3
34.5786	-82.2544	354.6	90	Foliation	Laurens_Thrust_Sheet	34082-E3
34.5848	-82.2996	358.2	0	Foliation	Laurens_Thrust_Sheet	34082-E3
34.589	-82.3259	215.7	55	Foliation	Laurens_Thrust_Sheet	34082-E3
34.5892	-82.2666	310.8	35	Foliation	Laurens_Thrust_Sheet	34082-E3
34.5905	-82.364	159.8	90	Foliation	Paris_Mountain_Thrust_Sheet	34082-E3
34.591	-82.3083	359	0	Foliation	Laurens_Thrust_Sheet	34082-E3
34.5969	-82.3007	358.1	0	Foliation	Laurens_Thrust_Sheet	34082-E3
34.6021	-82.2713	18.1	90	Foliation	Laurens_Thrust_Sheet	34082-E3
34.6033	-82.2988	359.2	0	Foliation	Laurens_Thrust_Sheet	34082-E3
34.6039	-82.3286	168	50	Foliation	Paris_Mountain_Thrust_Sheet	34082-E3
34.6135	-82.3022	357.9	0	Foliation	Laurens_Thrust_Sheet	34082-E3
34.616	-82.3356	156.3	20	Foliation	Paris_Mountain_Thrust_Sheet	34082-E3
34.6223	-82.3137	358.4	0	Foliation	Laurens_Thrust_Sheet	34082-E3
34.5067	-82.483	321.6	75	Foliation	Six_Mile_Thrust_Sheet	34082-E4
34.5077	-82.4438	24.3	60	Foliation	Paris_Mountain_Thrust_Sheet	34082-E4
34.512	-82.4548	359.9	0	Bedding	Six_Mile_Thrust_Sheet	34082-E4
34.5128	-82.4841	234.3	90	Foliation	Six_Mile_Thrust_Sheet	34082-E4
34.5189	-82.4638	9.1	65	Foliation	Six_Mile_Thrust_Sheet	34082-E4
34.5204	-82.4578	354.5	55	Foliation	Six_Mile_Thrust_Sheet	34082-E4
34.527	-82.4414	311.1	45	Foliation	Paris_Mountain_Thrust_Sheet	34082-E4
34.5293	-82.3962	339.3	90	Foliation	Paris_Mountain_Thrust_Sheet	34082-E4
34.532	-82.4872	347.1	90	Foliation	Six_Mile_Thrust_Sheet	34082-E4
34.5325	-82.4697	31.4	50	Foliation	Six_Mile_Thrust_Sheet	34082-E4
34.5342	-82.3883	335.7	55	Foliation	Paris_Mountain_Thrust_Sheet	34082-E4
34.5386	-82.4727	350.8	90	Foliation	Six_Mile_Thrust_Sheet	34082-E4
34.5386	-82.4282	316.7	55	Foliation	Paris_Mountain_Thrust_Sheet	34082-E4
34.5391	-82.4053	3.7	75	Foliation	Paris_Mountain_Thrust_Sheet	34082-E4
34.541	-82.412	302.1	35	Foliation	Paris_Mountain_Thrust_Sheet	34082-E4
34.5411	-82.4936	16.3	40	Foliation	Six_Mile_Thrust_Sheet	34082-E4
34.5535	-82.4237	259.5	60	Foliation	Paris_Mountain_Thrust_Sheet	34082-E4
34.5556	-82.4839	4.3	65	Foliation	Six_Mile_Thrust_Sheet	34082-E4
34.5615	-82.3867	358.4	55	Foliation	Paris_Mountain_Thrust_Sheet	34082-E4
34.5632	-82.4259	331.5	30	Foliation	Paris_Mountain_Thrust_Sheet	34082-E4
34.5657	-82.4748	338	30	Foliation	Six_Mile_Thrust_Sheet	34082-E4
34.567	-82.4677	351	65	Foliation	Six_Mile_Thrust_Sheet	34082-E4
34.5673	-82.3971	355.6	60	Foliation	Paris_Mountain_Thrust_Sheet	34082-E4
34.5721	-82.4317	1.3	0	Foliation	Paris_Mountain_Thrust_Sheet	34082-E4
34.5775	-82.4644	29	45	Foliation	Six_Mile_Thrust_Sheet	34082-E4
34.5793	-82.4261	261.7	60	Foliation	Paris_Mountain_Thrust_Sheet	34082-E4
34.5803	-82.4865	359.9	0	Foliation	Six_Mile_Thrust_Sheet	34082-E4
34.5818	-82.475	300.8	60	Foliation	Six_Mile_Thrust_Sheet	34082-E4
34.5822	-82.3843	337.8	70	Foliation	Paris_Mountain_Thrust_Sheet	34082-E4
34.5877	-82.384	359.9	50	Foliation	Paris_Mountain_Thrust_Sheet	34082-E4
34.5894	-82.4099	343.9	90	Foliation	Paris_Mountain_Thrust_Sheet	34082-E4
34.5931	-82.4897	311.3	20	Foliation	Six_Mile_Thrust_Sheet	34082-E4
34.594	-82.3757	354.4	70	Foliation	Paris_Mountain_Thrust_Sheet	34082-E4
34.5962	-82.4011	335.4	60	Foliation	Paris_Mountain_Thrust_Sheet	34082-E4
34.5973	-82.4449	349.6	60	Foliation	Paris_Mountain_Thrust_Sheet	34082-E4
34.599	-82.4357	352.4	45	Foliation	Paris_Mountain_Thrust_Sheet	34082-E4
34.6008	-82.4571	358.3	0	Foliation	Six_Mile_Thrust_Sheet	34082-E4
34.6043	-82.4253	356.3	60	Foliation	Paris_Mountain_Thrust_Sheet	34082-E4
34.6044	-82.488	358.6	0	Foliation	Six_Mile_Thrust_Sheet	34082-E4
34.6087	-82.4107	0.5	0	Foliation	Paris_Mountain_Thrust_Sheet	34082-E4
34.6142	-82.4474	17	70	Foliation	Paris_Mountain_Thrust_Sheet	34082-E4
34.6163	-82.466	50.7	50	Foliation	Six_Mile_Thrust_Sheet	34082-E4
34.6183	-82.4326	29.3	40	Foliation	Paris_Mountain_Thrust_Sheet	34082-E4
34.5006	-82.5525	72.7	49	Foliation	Six_Mile_Thrust_Sheet	34082-E5
34.5029	-82.6013	288.8	33	Foliation	Six_Mile_Thrust_Sheet	34082-E5
34.5043	-82.5882	243.1	32	Foliation	Six_Mile_Thrust_Sheet	34082-E5
34.5058	-82.5557	178.2	25	Foliation	Six_Mile_Thrust_Sheet	34082-E5
34.5059	-82.5252	350.6	25	Foliation	Six_Mile_Thrust_Sheet	34082-E5
34.5113	-82.6211	58.9	14	Foliation	Six_Mile_Thrust_Sheet	34082-E5
34.5117	-82.5582	221.7	7	Foliation	Six_Mile_Thrust_Sheet	34082-E5
34.5126	-82.5319	232.4	15	Foliation	Six_Mile_Thrust_Sheet	34082-E5
34.5129	-82.5838	293	25	Foliation	Six_Mile_Thrust_Sheet	34082-E5
34.5131	-82.5676	271.6	36	Foliation	Six_Mile_Thrust_Sheet	34082-E5
34.5162	-82.6054	195.1	13	Foliation	Six_Mile_Thrust_Sheet	34082-E5
34.5164	-82.6054	22.7	27	Foliation	Six_Mile_Thrust_Sheet	34082-E5
34.5209	-82.6185	16.5	59	Foliation	Six_Mile_Thrust_Sheet	34082-E5
34.5267	-82.583	180	23	Foliation	Six_Mile_Thrust_Sheet	34082-E5
34.527	-82.5722	33.3	10	Foliation	Six_Mile_Thrust_Sheet	34082-E5
34.5294	-82.545	51.7	24	Foliation	Six_Mile_Thrust_Sheet	34082-E5
34.5338	-82.5274	43.1	12	Foliation	Six_Mile_Thrust_Sheet	34082-E5
34.5376	-82.6016	4.3	61	Foliation	Six_Mile_Thrust_Sheet	34082-E5
34.5378	-82.579	43.8	32	Foliation	Six_Mile_Thrust_Sheet	34082-E5
34.544	-82.5705	199.6	39	Foliation	Six_Mile_Thrust_Sheet	34082-E5
34.5447	-82.5394	178.1	56	Foliation	Six_Mile_Thrust_Sheet	34082-E5
34.5467	-82.5239	174	23	Foliation	Six_Mile_Thrust_Sheet	34082-E5
34.5507	-82.5527	40.7	25	Foliation	Six_Mile_Thrust_Sheet	34082-E5
34.5511	-82.5758	39.5	18	Foliation	Six_Mile_Thrust_Sheet	34082-E5
34.5513	-82.5043	103.7	25	Foliation	Six_Mile_Thrust_Sheet	34082-E5
34.5583	-82.6221	0.6	22	Foliation	Six_Mile_Thrust_Sheet	34082-E5
34.5592	-82.6133	124.2	14	Foliation	Six_Mile_Thrust_Sheet	34082-E5
34.5603	-82.5824	357.5	30	Foliation	Six_Mile_Thrust_Sheet	34082-E5
34.5604	-82.5084	94.4	35	Foliation	Six_Mile_Thrust_Sheet	34082-E5
34.5607	-82.5748	183.5	39	Foliation	Six_Mile_Thrust_Sheet	34082-E5
34.5607	-82.5903	301.2	27	Foliation	Six_Mile_Thrust_Sheet	34082-E5
34.562	-82.5674	2.4	4	Foliation	Six_Mile_Thrust_Sheet	34082-E5
34.5653	-82.534	104	26	Foliation	Six_Mile_Thrust_Sheet	34082-E5
34.5659	-82.5503	185	29	Foliation	Six_Mile_Thrust_Sheet	34082-E5
34.5665	-82.6089	102	17	Foliation	Six_Mile_Thrust_Sheet	34082-E5
34.572	-82.536	60.3	26	Foliation	Six_Mile_Thrust_Sheet	34082-E5
34.575	-82.563	80.9	29	Foliation	Six_Mile_Thrust_Sheet	34082-E5
34.5758	-82.6036	211.8	36	Foliation	Six_Mile_Thrust_Sheet	34082-E5
34.5772	-82.5572	152.8	54	Foliation	Six_Mile_Thrust_Sheet	34082-E5
34.5779	-82.5985	67.4	23	Foliation	Six_Mile_Thrust_Sheet	34082-E5
34.5803	-82.5113	18.4	85	Foliation	Six_Mile_Thrust_Sheet	34082-E5
34.5812	-82.6188	66.6	46	Foliation	Six_Mile_Thrust_Sheet	34082-E5
34.5825	-82.5283	354	62	Foliation	Six_Mile_Thrust_Sheet	34082-E5
34.5827	-82.5378	45.3	17	Foliation	Six_Mile_Thrust_Sheet	34082-E5
34.5828	-82.5516	305.8	17	Foliation	Six_Mile_Thrust_Sheet	34082-E5
34.5866	-82.5553	355.3	39	Foliation	Six_Mile_Thrust_Sheet	34082-E5
34.5919	-82.5883	26.5	44	Foliation	Six_Mile_Thrust_Sheet	34082-E5
34.5931	-82.5728	351.5	9	Foliation	Six_Mile_Thrust_Sheet	34082-E5
34.5936	-82.6	39	19	Foliation	Six_Mile_Thrust_Sheet	34082-E5
34.5963	-82.5329	164.8	25	Foliation	Six_Mile_Thrust_Sheet	34082-E5
34.5976	-82.5299	358.3	31	Foliation	Six_Mile_Thrust_Sheet	34082-E5
34.5987	-82.508	12.2	21	Foliation	Six_Mile_Thrust_Sheet	34082-E5
34.5987	-82.579	12.2	18	Foliation	Six_Mile_Thrust_Sheet	34082-E5
34.603	-82.618	116.8	30	Foliation	Six_Mile_Thrust_Sheet	34082-E5
34.6035	-82.5407	338.6	10	Foliation	Six_Mile_Thrust_Sheet	34082-E5
34.6042	-82.5675	141.5	12	Foliation	Six_Mile_Thrust_Sheet	34082-E5
34.6048	-82.5273	329.9	31	Foliation	Six_Mile_Thrust_Sheet	34082-E5
34.6065	-82.5109	40.8	46	Foliation	Six_Mile_Thrust_Sheet	34082-E5
34.6071	-82.5188	356.9	47	Foliation	Six_Mile_Thrust_Sheet	34082-E5
34.6137	-82.6217	4.4	17	Foliation	Six_Mile_Thrust_Sheet	34082-E5
34.6183	-82.5663	349.3	17	Foliation	Six_Mile_Thrust_Sheet	34082-E5
34.6185	-82.545	34.8	34	Foliation	Six_Mile_Thrust_Sheet	34082-E5
34.6194	-82.5344	333.4	27	Foliation	Six_Mile_Thrust_Sheet	34082-E5
34.6199	-82.5833	39.5	39	Foliation	Six_Mile_Thrust_Sheet	34082-E5
34.6213	-82.6124	50.6	14	Foliation	Six_Mile_Thrust_Sheet	34082-E5
34.6235	-82.6244	1.2	24	Foliation	Six_Mile_Thrust_Sheet	34082-E5
34.5027	-82.693	327.8	19	Foliation	Six_Mile_Thrust_Sheet	34082-E6
34.5042	-82.7013	264.4	32	Foliation	Six_Mile_Thrust_Sheet	34082-E6
34.5047	-82.7124	308.4	54	Foliation	Six_Mile_Thrust_Sheet	34082-E6
34.5078	-82.6774	321	27	Foliation	Six_Mile_Thrust_Sheet	34082-E6
34.5113	-82.6727	319.9	27	Foliation	Six_Mile_Thrust_Sheet	34082-E6
34.5188	-82.7064	314.5	41	Foliation	Six_Mile_Thrust_Sheet	34082-E6
34.5192	-82.6294	54	85	Foliation	Six_Mile_Thrust_Sheet	34082-E6
34.5236	-82.7255	341.8	35	Foliation	Six_Mile_Thrust_Sheet	34082-E6
34.524	-82.6402	329.6	27	Foliation	Six_Mile_Thrust_Sheet	34082-E6
34.5281	-82.6257	34.1	56	Foliation	Six_Mile_Thrust_Sheet	34082-E6
34.5303	-82.6549	307.1	30	Foliation	Six_Mile_Thrust_Sheet	34082-E6
34.5324	-82.7192	36.1	29	Foliation	Six_Mile_Thrust_Sheet	34082-E6
34.538	-82.6904	34.9	48	Foliation	Six_Mile_Thrust_Sheet	34082-E6
34.5409	-82.6946	20.1	35	Foliation	Six_Mile_Thrust_Sheet	34082-E6
34.5423	-82.6332	5.3	58	Foliation	Six_Mile_Thrust_Sheet	34082-E6
34.5425	-82.6411	19.6	52	Foliation	Six_Mile_Thrust_Sheet	34082-E6
34.5462	-82.742	312.3	53	Foliation	Six_Mile_Thrust_Sheet	34082-E6
34.5517	-82.7243	263.2	17	Foliation	Six_Mile_Thrust_Sheet	34082-E6
34.5554	-82.6588	3.1	36	Foliation	Six_Mile_Thrust_Sheet	34082-E6
34.5577	-82.6899	6.8	28	Foliation	Six_Mile_Thrust_Sheet	34082-E6
34.5595	-82.7194	337.7	42	Foliation	Six_Mile_Thrust_Sheet	34082-E6
34.56	-82.6982	19.3	22	Foliation	Six_Mile_Thrust_Sheet	34082-E6
34.5613	-82.7402	15.1	31	Foliation	Six_Mile_Thrust_Sheet	34082-E6
34.5677	-82.6292	22.9	75	Foliation	Six_Mile_Thrust_Sheet	34082-E6
34.57	-82.7275	29.9	25	Foliation	Six_Mile_Thrust_Sheet	34082-E6
34.57	-82.6403	29.1	26	Foliation	Six_Mile_Thrust_Sheet	34082-E6
34.573	-82.6707	7.2	36	Foliation	Six_Mile_Thrust_Sheet	34082-E6
34.5754	-82.7291	275	16	Foliation	Six_Mile_Thrust_Sheet	34082-E6
34.5766	-82.6928	5.8	47	Foliation	Six_Mile_Thrust_Sheet	34082-E6
34.5794	-82.6495	17.5	39	Foliation	Six_Mile_Thrust_Sheet	34082-E6
34.5794	-82.7452	142.9	10	Foliation	Six_Mile_Thrust_Sheet	34082-E6
34.5805	-82.7205	237.3	25	Foliation	Six_Mile_Thrust_Sheet	34082-E6
34.5807	-82.7097	348.6	27	Foliation	Six_Mile_Thrust_Sheet	34082-E6
34.5807	-82.6338	41.7	39	Foliation	Six_Mile_Thrust_Sheet	34082-E6
34.5824	-82.7316	17.1	21	Foliation	Six_Mile_Thrust_Sheet	34082-E6
34.5851	-82.7	360	24	Foliation	Six_Mile_Thrust_Sheet	34082-E6
34.5898	-82.6769	42.3	52	Foliation	Six_Mile_Thrust_Sheet	34082-E6
34.5924	-82.7186	83.7	26	Foliation	Six_Mile_Thrust_Sheet	34082-E6
34.5926	-82.6416	31.1	53	Foliation	Six_Mile_Thrust_Sheet	34082-E6
34.595	-82.6831	32	45	Foliation	Six_Mile_Thrust_Sheet	34082-E6
34.5961	-82.6665	7.2	42	Foliation	Six_Mile_Thrust_Sheet	34082-E6
34.5977	-82.7429	20.7	29	Foliation	Six_Mile_Thrust_Sheet	34082-E6
34.5981	-82.654	22.1	19	Foliation	Six_Mile_Thrust_Sheet	34082-E6
34.5988	-82.7073	316.8	17	Foliation	Six_Mile_Thrust_Sheet	34082-E6
34.6006	-82.6455	13.6	32	Foliation	Six_Mile_Thrust_Sheet	34082-E6
34.6016	-82.7313	18.6	28	Foliation	Six_Mile_Thrust_Sheet	34082-E6
34.6069	-82.7359	340	30	Foliation	Six_Mile_Thrust_Sheet	34082-E6
34.6073	-82.63	52.1	19	Foliation	Six_Mile_Thrust_Sheet	34082-E6
34.6097	-82.7078	264.5	27	Foliation	Six_Mile_Thrust_Sheet	34082-E6
34.6099	-82.6909	22.5	39	Foliation	Six_Mile_Thrust_Sheet	34082-E6
34.6185	-82.6918	129.1	12	Foliation	Six_Mile_Thrust_Sheet	34082-E6
34.6185	-82.7218	7.9	22	Foliation	Six_Mile_Thrust_Sheet	34082-E6
34.6241	-82.7389	324.2	30	Foliation	Six_Mile_Thrust_Sheet	34082-E6
34.5008	-82.8622	30	16	Foliation	Six_Mile_Thrust_Sheet	34082-E7
34.5052	-82.8551	343.5	8	Foliation	Six_Mile_Thrust_Sheet	34082-E7
34.5078	-82.7631	236.9	21	Foliation	Six_Mile_Thrust_Sheet	34082-E7
34.5089	-82.8518	308.3	28	Foliation	Six_Mile_Thrust_Sheet	34082-E7
34.5113	-82.7769	337.3	31	Foliation	Six_Mile_Thrust_Sheet	34082-E7
34.5144	-82.8601	353.5	23	Foliation	Six_Mile_Thrust_Sheet	34082-E7
34.5151	-82.7691	53.6	6	Foliation	Six_Mile_Thrust_Sheet	34082-E7
34.5177	-82.7714	247.8	40	Foliation	Six_Mile_Thrust_Sheet	34082-E7
34.5207	-82.8583	164.3	21	Foliation	Six_Mile_Thrust_Sheet	34082-E7
34.5219	-82.7552	338.1	18	Foliation	Six_Mile_Thrust_Sheet	34082-E7
34.5234	-82.8232	342.3	30	Foliation	Six_Mile_Thrust_Sheet	34082-E7
34.5237	-82.7804	335.1	28	Foliation	Six_Mile_Thrust_Sheet	34082-E7
34.5256	-82.7997	359.1	38	Foliation	Six_Mile_Thrust_Sheet	34082-E7
34.5259	-82.873	217	6	Foliation	Six_Mile_Thrust_Sheet	34082-E7
34.5273	-82.8066	35	30	Foliation	Six_Mile_Thrust_Sheet	34082-E7
34.5289	-82.8357	339.8	39	Foliation	Six_Mile_Thrust_Sheet	34082-E7
34.5354	-82.8253	289.5	24	Foliation	Six_Mile_Thrust_Sheet	34082-E7
34.5364	-82.7557	15.9	22	Foliation	Six_Mile_Thrust_Sheet	34082-E7
34.5367	-82.7796	60.4	48	Foliation	Six_Mile_Thrust_Sheet	34082-E7
34.5384	-82.8209	301.6	51	Foliation	Six_Mile_Thrust_Sheet	34082-E7
34.5389	-82.7582	260.9	41	Foliation	Six_Mile_Thrust_Sheet	34082-E7
34.5411	-82.8034	328.8	56	Foliation	Six_Mile_Thrust_Sheet	34082-E7
34.542	-82.7872	235.1	17	Foliation	Six_Mile_Thrust_Sheet	34082-E7
34.5427	-82.8723	225	44	Foliation	Six_Mile_Thrust_Sheet	34082-E7
34.5471	-82.7506	55.1	47	Foliation	Six_Mile_Thrust_Sheet	34082-E7
34.5489	-82.7653	297.9	39	Foliation	Six_Mile_Thrust_Sheet	34082-E7
34.5524	-82.7953	32	57	Foliation	Six_Mile_Thrust_Sheet	34082-E7
34.5526	-82.8527	237.3	6	Foliation	Six_Mile_Thrust_Sheet	34082-E7
34.5527	-82.7725	25	39	Foliation	Six_Mile_Thrust_Sheet	34082-E7
34.5597	-82.8433	170.3	2	Foliation	Six_Mile_Thrust_Sheet	34082-E7
34.5606	-82.781	352.8	33	Foliation	Six_Mile_Thrust_Sheet	34082-E7
34.5619	-82.7893	336	14	Foliation	Six_Mile_Thrust_Sheet	34082-E7
34.5631	-82.8073	33.9	42	Foliation	Six_Mile_Thrust_Sheet	34082-E7
34.565	-82.7962	328.2	30	Foliation	Six_Mile_Thrust_Sheet	34082-E7
34.5661	-82.8209	307.2	57	Foliation	Six_Mile_Thrust_Sheet	34082-E7
34.5706	-82.855	306.5	24	Foliation	Six_Mile_Thrust_Sheet	34082-E7
34.5721	-82.8151	52	86	Foliation	Six_Mile_Thrust_Sheet	34082-E7
34.5746	-82.8264	3.6	14	Foliation	Six_Mile_Thrust_Sheet	34082-E7
34.576	-82.7597	339	23	Foliation	Six_Mile_Thrust_Sheet	34082-E7
34.5774	-82.7743	39	10	Foliation	Six_Mile_Thrust_Sheet	34082-E7
34.5797	-82.8264	47.5	19	Foliation	Six_Mile_Thrust_Sheet	34082-E7
34.5822	-82.8661	252.3	24	Foliation	Six_Mile_Thrust_Sheet	34082-E7
34.5847	-82.8721	344.2	21	Foliation	Six_Mile_Thrust_Sheet	34082-E7
34.5862	-82.7844	313.6	30	Foliation	Six_Mile_Thrust_Sheet	34082-E7
34.5862	-82.8075	41.7	51	Foliation	Six_Mile_Thrust_Sheet	34082-E7
34.5868	-82.8324	38.4	58	Foliation	Six_Mile_Thrust_Sheet	34082-E7
34.5902	-82.8347	213.2	30	Foliation	Six_Mile_Thrust_Sheet	34082-E7
34.5909	-82.7625	39.6	35	Foliation	Six_Mile_Thrust_Sheet	34082-E7
34.5919	-82.8001	349.1	15	Foliation	Six_Mile_Thrust_Sheet	34082-E7
34.5948	-82.8172	297.7	15	Foliation	Six_Mile_Thrust_Sheet	34082-E7
34.5966	-82.7687	351.1	27	Foliation	Six_Mile_Thrust_Sheet	34082-E7
34.5985	-82.7553	8.8	58	Foliation	Six_Mile_Thrust_Sheet	34082-E7
34.6009	-82.7848	259.5	28	Foliation	Six_Mile_Thrust_Sheet	34082-E7
34.6018	-82.8024	332.7	26	Foliation	Six_Mile_Thrust_Sheet	34082-E7
34.6045	-82.7608	285	34	Foliation	Six_Mile_Thrust_Sheet	34082-E7
34.6045	-82.7747	302.1	21	Foliation	Six_Mile_Thrust_Sheet	34082-E7
34.6093	-82.8183	219.4	30	Foliation	Six_Mile_Thrust_Sheet	34082-E7
34.6104	-82.786	235.9	43	Foliation	Six_Mile_Thrust_Sheet	34082-E7
34.6163	-82.7615	10.1	30	Foliation	Six_Mile_Thrust_Sheet	34082-E7
34.6177	-82.7744	352.1	25	Foliation	Six_Mile_Thrust_Sheet	34082-E7
34.6194	-82.8254	227.6	22	Foliation	Six_Mile_Thrust_Sheet	34082-E7
34.6198	-82.7915	34.9	17	Foliation	Six_Mile_Thrust_Sheet	34082-E7
34.6204	-82.852	304.4	27	Foliation	Six_Mile_Thrust_Sheet	34082-E7
34.5005	-82.9537	256.7	28	Foliation	Six_Mile_Thrust_Sheet	34082-E8
34.5014	-82.9966	236.3	25	Foliation	Six_Mile_Thrust_Sheet	34082-E8
34.5024	-82.8846	275.4	24	Foliation	Six_Mile_Thrust_Sheet	34082-E8
34.5024	-82.986	280.8	34	Foliation	Six_Mile_Thrust_Sheet	34082-E8
34.503	-82.9597	330	19	Foliation	Six_Mile_Thrust_Sheet	34082-E8
34.5047	-82.9002	257.6	23	Foliation	Six_Mile_Thrust_Sheet	34082-E8
34.5099	-82.938	269.3	8	Foliation	Six_Mile_Thrust_Sheet	34082-E8
34.5102	-82.888	63.9	5	Foliation	Six_Mile_Thrust_Sheet	34082-E8
34.5129	-82.9212	310.3	20	Foliation	Six_Mile_Thrust_Sheet	34082-E8
34.5144	-82.9429	1.7	21	Foliation	Six_Mile_Thrust_Sheet	34082-E8
34.5167	-82.9509	36	33	Foliation	Six_Mile_Thrust_Sheet	34082-E8
34.5169	-82.9869	247.8	32	Foliation	Six_Mile_Thrust_Sheet	34082-E8
34.5175	-82.9749	350	40	Foliation	Six_Mile_Thrust_Sheet	34082-E8
34.5175	-82.9302	254.8	22	Foliation	Six_Mile_Thrust_Sheet	34082-E8
34.5196	-82.9251	308.9	24	Foliation	Six_Mile_Thrust_Sheet	34082-E8
34.5227	-82.9505	28	33	Foliation	Six_Mile_Thrust_Sheet	34082-E8
34.5234	-82.8993	255.2	25	Foliation	Six_Mile_Thrust_Sheet	34082-E8
34.5261	-82.885	293.8	35	Foliation	Six_Mile_Thrust_Sheet	34082-E8
34.528	-82.991	310.7	18	Foliation	Six_Mile_Thrust_Sheet	34082-E8
34.5282	-82.974	268.3	21	Foliation	Chauga_Walhalla_Thrust_Sheet	34082-E8
34.5284	-82.9574	61	29	Foliation	Chauga_Walhalla_Thrust_Sheet	34082-E8
34.529	-82.927	22.9	18	Foliation	Six_Mile_Thrust_Sheet	34082-E8
34.5328	-82.9749	287.2	36	Foliation	Chauga_Walhalla_Thrust_Sheet	34082-E8
34.5332	-82.9648	287.2	36	Foliation	Chauga_Walhalla_Thrust_Sheet	34082-E8
34.5356	-82.8836	357.3	26	Foliation	Six_Mile_Thrust_Sheet	34082-E8
34.5381	-82.9581	260.4	8	Foliation	Chauga_Walhalla_Thrust_Sheet	34082-E8
34.5446	-82.9576	218.5	26	Foliation	Chauga_Walhalla_Thrust_Sheet	34082-E8
34.5448	-82.9177	288.8	10	Foliation	Six_Mile_Thrust_Sheet	34082-E8
34.5454	-82.9258	257	42	Foliation	Six_Mile_Thrust_Sheet	34082-E8
34.5458	-83	249.9	16	Foliation	Six_Mile_Thrust_Sheet	34082-E8
34.5461	-82.9841	306.8	16	Foliation	Six_Mile_Thrust_Sheet	34082-E8
34.5547	-82.9673	258.8	17	Foliation	Six_Mile_Thrust_Sheet	34082-E8
34.5567	-82.995	303.4	19	Foliation	Six_Mile_Thrust_Sheet	34082-E8
34.5588	-82.9115	265	12	Foliation	Six_Mile_Thrust_Sheet	34082-E8
34.5607	-82.9699	242.3	29	Foliation	Six_Mile_Thrust_Sheet	34082-E8
34.5628	-82.921	86.6	6	Foliation	Chauga_Walhalla_Thrust_Sheet	34082-E8
34.5632	-82.9417	237.4	20	Foliation	Six_Mile_Thrust_Sheet	34082-E8
34.5652	-82.9925	8.5	55	Foliation	Six_Mile_Thrust_Sheet	34082-E8
34.5729	-82.9874	335.9	38	Foliation	Six_Mile_Thrust_Sheet	34082-E8
34.5729	-82.9491	254.2	22	Foliation	Six_Mile_Thrust_Sheet	34082-E8
34.578	-82.9159	35.7	21	Foliation	Chauga_Walhalla_Thrust_Sheet	34082-E8
34.5809	-82.9666	230	19	Foliation	Six_Mile_Thrust_Sheet	34082-E8
34.5811	-82.8771	194.8	25	Foliation	Six_Mile_Thrust_Sheet	34082-E8
34.5821	-82.9304	78.5	16	Foliation	Chauga_Walhalla_Thrust_Sheet	34082-E8
34.5821	-82.9542	321.7	39	Foliation	Six_Mile_Thrust_Sheet	34082-E8
34.5832	-82.9427	132.7	40	Foliation	Chauga_Walhalla_Thrust_Sheet	34082-E8
34.5844	-82.9242	349.4	28	Foliation	Chauga_Walhalla_Thrust_Sheet	34082-E8
34.5845	-82.9076	5.5	10	Foliation	Chauga_Walhalla_Thrust_Sheet	34082-E8
34.5918	-82.9177	344.1	8	Foliation	Chauga_Walhalla_Thrust_Sheet	34082-E8
34.5964	-82.9051	10.7	24	Foliation	Chauga_Walhalla_Thrust_Sheet	34082-E8
34.5981	-82.9701	167.1	30	Foliation	Chauga_Walhalla_Thrust_Sheet	34082-E8
34.5985	-82.986	139.9	35	Foliation	Six_Mile_Thrust_Sheet	34082-E8
34.5994	-82.963	273.7	47	Foliation	Six_Mile_Thrust_Sheet	34082-E8
34.6063	-82.9796	306.6	24	Foliation	Chauga_Walhalla_Thrust_Sheet	34082-E8
34.6067	-82.92	95	17	Foliation	Six_Mile_Thrust_Sheet	34082-E8
34.6084	-82.9348	213.3	12	Foliation	Six_Mile_Thrust_Sheet	34082-E8
34.6111	-82.9198	255.7	21	Foliation	Six_Mile_Thrust_Sheet	34082-E8
34.6138	-82.8845	13.9	19	Foliation	Six_Mile_Thrust_Sheet	34082-E8
34.6153	-82.9584	297.5	35	Foliation	Chauga_Walhalla_Thrust_Sheet	34082-E8
34.6164	-82.9789	174.1	31	Foliation	Six_Mile_Thrust_Sheet	34082-E8
34.617	-82.9039	33.9	40	Foliation	Chauga_Walhalla_Thrust_Sheet	34082-E8
34.6174	-82.9344	271.2	17	Foliation	Six_Mile_Thrust_Sheet	34082-E8
34.6178	-82.995	277.2	21	Foliation	Six_Mile_Thrust_Sheet	34082-E8
34.6212	-82.9667	304.5	10	Foliation	Chauga_Walhalla_Thrust_Sheet	34082-E8
34.6214	-82.8972	350.9	21	Foliation	Chauga_Walhalla_Thrust_Sheet	34082-E8
34.6258	-82.0004	22.6	45	Foliation	Laurens_Thrust_Sheet	34082-F1
34.6278	-82.0623	12.3	55	Foliation	Laurens_Thrust_Sheet	34082-F1
34.6301	-82.0964	1.1	0	Foliation	Laurens_Thrust_Sheet	34082-F1
34.6337	-82.0643	360	0	Foliation	Laurens_Thrust_Sheet	34082-F1
34.6406	-82.0922	44.7	90	Foliation	Laurens_Thrust_Sheet	34082-F1
34.6445	-82.1113	42.8	65	Foliation	Laurens_Thrust_Sheet	34082-F1
34.6452	-82.075	9.5	35	Foliation	Laurens_Thrust_Sheet	34082-F1
34.6486	-82.0313	3.8	80	Foliation	Laurens_Thrust_Sheet	34082-F1
34.6494	-82.0657	56	35	Foliation	Laurens_Thrust_Sheet	34082-F1
34.6531	-82.0216	15.9	50	Foliation	Laurens_Thrust_Sheet	34082-F1
34.6534	-82.092	0.3	0	Foliation	Laurens_Thrust_Sheet	34082-F1
34.6575	-82.0548	350.7	60	Foliation	Laurens_Thrust_Sheet	34082-F1
34.6606	-82.0127	350.6	60	Foliation	Laurens_Thrust_Sheet	34082-F1
34.6662	-82.0649	235.2	25	Foliation	Laurens_Thrust_Sheet	34082-F1
34.6672	-82.0226	51.5	50	Foliation	Laurens_Thrust_Sheet	34082-F1
34.675	-82.041	339.1	70	Foliation	Laurens_Thrust_Sheet	34082-F1
34.6751	-82.0077	21.5	75	Foliation	Laurens_Thrust_Sheet	34082-F1
34.6759	-82.0895	359	0	Foliation	Laurens_Thrust_Sheet	34082-F1
34.6768	-82.1117	14.3	20	Foliation	Laurens_Thrust_Sheet	34082-F1
34.6769	-82.0722	334.9	90	Foliation	Laurens_Thrust_Sheet	34082-F1
34.681	-82.0021	310.6	45	Foliation	Laurens_Thrust_Sheet	34082-F1
34.6865	-82.0238	36.5	60	Foliation	Laurens_Thrust_Sheet	34082-F1
34.6878	-82.0658	221.6	25	Foliation	Laurens_Thrust_Sheet	34082-F1
34.6889	-82.0325	333.4	90	Foliation	Laurens_Thrust_Sheet	34082-F1
34.6898	-82.0847	196.2	70	Foliation	Laurens_Thrust_Sheet	34082-F1
34.6902	-82.0013	356.7	0	Foliation	Laurens_Thrust_Sheet	34082-F1
34.6958	-82.0593	40.6	50	Foliation	Laurens_Thrust_Sheet	34082-F1
34.697	-82.0218	357.5	0	Foliation	Laurens_Thrust_Sheet	34082-F1
34.7012	-82.043	309.5	60	Foliation	Laurens_Thrust_Sheet	34082-F1
34.7069	-82.0118	357.7	0	Foliation	Laurens_Thrust_Sheet	34082-F1
34.713	-82.115	167.6	50	Foliation	Laurens_Thrust_Sheet	34082-F1
34.7175	-82.0299	311.1	60	Foliation	Laurens_Thrust_Sheet	34082-F1
34.7208	-82.0299	313.1	75	Foliation	Laurens_Thrust_Sheet	34082-F1
34.7208	-82.1172	358.7	0	Foliation	Laurens_Thrust_Sheet	34082-F1
34.7338	-82.1167	344.5	45	Foliation	Laurens_Thrust_Sheet	34082-F1
34.7363	-82.0561	318.2	65	Foliation	Laurens_Thrust_Sheet	34082-F1
34.7373	-82.0103	26.7	90	Foliation	Laurens_Thrust_Sheet	34082-F1
34.7373	-82.0662	54.2	70	Foliation	Laurens_Thrust_Sheet	34082-F1
34.74	-82.1252	0.4	20	Foliation	Laurens_Thrust_Sheet	34082-F1
34.742	-82.004	22.6	10	Foliation	Laurens_Thrust_Sheet	34082-F1
34.7447	-82.0821	18.4	75	Foliation	Laurens_Thrust_Sheet	34082-F1
34.7462	-82.1073	161.5	60	Foliation	Laurens_Thrust_Sheet	34082-F1
34.7491	-82.0936	341.1	50	Foliation	Laurens_Thrust_Sheet	34082-F1
34.6276	-82.1505	46.8	30	Foliation	Laurens_Thrust_Sheet	34082-F2
34.6301	-82.2135	0.5	0	Foliation	Laurens_Thrust_Sheet	34082-F2
34.6327	-82.1756	217	60	Foliation	Laurens_Thrust_Sheet	34082-F2
34.6328	-82.1823	150.3	80	Foliation	Laurens_Thrust_Sheet	34082-F2
34.6336	-82.2222	358.3	0	Foliation	Laurens_Thrust_Sheet	34082-F2
34.6347	-82.2462	29.2	45	Foliation	Laurens_Thrust_Sheet	34082-F2
34.6449	-82.196	213.2	40	Foliation	Laurens_Thrust_Sheet	34082-F2
34.6475	-82.1886	314.3	65	Foliation	Laurens_Thrust_Sheet	34082-F2
34.65	-82.1526	322.8	80	Foliation	Laurens_Thrust_Sheet	34082-F2
34.6583	-82.2045	352.9	65	Foliation	Laurens_Thrust_Sheet	34082-F2
34.6669	-82.1464	1.6	0	Foliation	Laurens_Thrust_Sheet	34082-F2
34.6692	-82.2404	140.2	90	Foliation	Laurens_Thrust_Sheet	34082-F2
34.6704	-82.1813	3.3	55	Foliation	Laurens_Thrust_Sheet	34082-F2
34.6705	-82.1706	230.8	75	Foliation	Laurens_Thrust_Sheet	34082-F2
34.6743	-82.1329	314.2	40	Foliation	Laurens_Thrust_Sheet	34082-F2
34.6747	-82.2286	193.3	50	Foliation	Laurens_Thrust_Sheet	34082-F2
34.677	-82.22	358.8	0	Foliation	Laurens_Thrust_Sheet	34082-F2
34.6857	-82.1541	315	45	Foliation	Laurens_Thrust_Sheet	34082-F2
34.6883	-82.1719	15.2	60	Foliation	Laurens_Thrust_Sheet	34082-F2
34.6943	-82.1764	4.5	60	Foliation	Laurens_Thrust_Sheet	34082-F2
34.7054	-82.2403	34.8	90	Foliation	Laurens_Thrust_Sheet	34082-F2
34.707	-82.1375	350	45	Foliation	Laurens_Thrust_Sheet	34082-F2
34.7141	-82.2047	349.1	70	Foliation	Laurens_Thrust_Sheet	34082-F2
34.7162	-82.1714	21	45	Foliation	Laurens_Thrust_Sheet	34082-F2
34.7165	-82.2162	343.6	60	Foliation	Laurens_Thrust_Sheet	34082-F2
34.7173	-82.1318	360	0	Foliation	Laurens_Thrust_Sheet	34082-F2
34.7228	-82.2203	345.5	45	Foliation	Laurens_Thrust_Sheet	34082-F2
34.7234	-82.1623	9.3	45	Foliation	Laurens_Thrust_Sheet	34082-F2
34.7244	-82.1304	338.2	65	Foliation	Laurens_Thrust_Sheet	34082-F2
34.7263	-82.1715	358.4	90	Foliation	Laurens_Thrust_Sheet	34082-F2
34.7289	-82.223	27	60	Foliation	Laurens_Thrust_Sheet	34082-F2
34.7303	-82.2004	345.1	55	Foliation	Laurens_Thrust_Sheet	34082-F2
34.7306	-82.1849	14.6	70	Foliation	Laurens_Thrust_Sheet	34082-F2
34.7372	-82.173	358.6	0	Foliation	Laurens_Thrust_Sheet	34082-F2
34.7411	-82.2141	18.7	75	Foliation	Laurens_Thrust_Sheet	34082-F2
34.7472	-82.1778	28.3	90	Foliation	Laurens_Thrust_Sheet	34082-F2
34.6267	-82.3014	358.5	0	Foliation	Laurens_Thrust_Sheet	34082-F3
34.6336	-82.3542	14.2	50	Foliation	Paris_Mountain_Thrust_Sheet	34082-F3
34.6338	-82.3422	3.4	90	Foliation	Paris_Mountain_Thrust_Sheet	34082-F3
34.6354	-82.327	2.1	0	Foliation	Paris_Mountain_Thrust_Sheet	34082-F3
34.6417	-82.3581	14.7	25	Foliation	Paris_Mountain_Thrust_Sheet	34082-F3
34.6421	-82.26	309.6	55	Foliation	Laurens_Thrust_Sheet	34082-F3
34.6442	-82.3264	25.6	90	Foliation	Paris_Mountain_Thrust_Sheet	34082-F3
34.6502	-82.3091	208.6	80	Foliation	Paris_Mountain_Thrust_Sheet	34082-F3
34.6559	-82.3254	15.6	90	Foliation	Paris_Mountain_Thrust_Sheet	34082-F3
34.656	-82.3257	179.9	90	Foliation	Paris_Mountain_Thrust_Sheet	34082-F3
34.6575	-82.3418	321.3	70	Foliation	Paris_Mountain_Thrust_Sheet	34082-F3
34.6595	-82.2963	1.1	85	Foliation	Paris_Mountain_Thrust_Sheet	34082-F3
34.6611	-82.2642	56.8	60	Foliation	Laurens_Thrust_Sheet	34082-F3
34.664	-82.3471	314.9	60	Foliation	Paris_Mountain_Thrust_Sheet	34082-F3
34.6648	-82.3658	17.2	60	Foliation	Paris_Mountain_Thrust_Sheet	34082-F3
34.6662	-82.3291	14.7	45	Foliation	Paris_Mountain_Thrust_Sheet	34082-F3
34.6707	-82.3558	60.4	20	Foliation	Paris_Mountain_Thrust_Sheet	34082-F3
34.6763	-82.3696	357.9	45	Foliation	Paris_Mountain_Thrust_Sheet	34082-F3
34.6784	-82.3345	21.2	45	Foliation	Paris_Mountain_Thrust_Sheet	34082-F3
34.6811	-82.2996	57.5	75	Foliation	Paris_Mountain_Thrust_Sheet	34082-F3
34.6835	-82.3188	27.5	55	Foliation	Paris_Mountain_Thrust_Sheet	34082-F3
34.693	-82.3397	359.6	0	Foliation	Paris_Mountain_Thrust_Sheet	34082-F3
34.6932	-82.3106	48.9	75	Foliation	Paris_Mountain_Thrust_Sheet	34082-F3
34.6943	-82.2889	48.7	85	Foliation	Paris_Mountain_Thrust_Sheet	34082-F3
34.7004	-82.3205	343.8	90	Foliation	Paris_Mountain_Thrust_Sheet	34082-F3
34.7056	-82.3022	359.2	0	Foliation	Paris_Mountain_Thrust_Sheet	34082-F3
34.7084	-82.3154	201.3	30	Foliation	Paris_Mountain_Thrust_Sheet	34082-F3
34.7148	-82.3525	338.7	90	Foliation	Paris_Mountain_Thrust_Sheet	34082-F3
34.7218	-82.3005	178	0	Bedding	Paris_Mountain_Thrust_Sheet	34082-F3
34.7241	-82.3305	16.1	70	Foliation	Paris_Mountain_Thrust_Sheet	34082-F3
34.7275	-82.2942	218.7	50	Foliation	Paris_Mountain_Thrust_Sheet	34082-F3
34.7316	-82.2667	20.4	70	Foliation	Paris_Mountain_Thrust_Sheet	34082-F3
34.732	-82.3037	16.2	45	Foliation	Paris_Mountain_Thrust_Sheet	34082-F3
34.7338	-82.3698	225.8	65	Foliation	Paris_Mountain_Thrust_Sheet	34082-F3
34.7348	-82.3295	49.2	70	Foliation	Paris_Mountain_Thrust_Sheet	34082-F3
34.7416	-82.3138	32	35	Foliation	Paris_Mountain_Thrust_Sheet	34082-F3
34.7472	-82.2841	359.9	50	Foliation	Paris_Mountain_Thrust_Sheet	34082-F3
34.6291	-82.4586	183.3	60	Foliation	Six_Mile_Thrust_Sheet	34082-F4
34.6298	-82.4413	4.3	60	Foliation	Paris_Mountain_Thrust_Sheet	34082-F4
34.6299	-82.412	192.1	65	Foliation	Paris_Mountain_Thrust_Sheet	34082-F4
34.6336	-82.477	0.7	80	Foliation	Six_Mile_Thrust_Sheet	34082-F4
34.6354	-82.4659	139.5	15	Foliation	Six_Mile_Thrust_Sheet	34082-F4
34.6356	-82.4456	3.6	50	Foliation	Paris_Mountain_Thrust_Sheet	34082-F4
34.6362	-82.3791	34.5	45	Foliation	Paris_Mountain_Thrust_Sheet	34082-F4
34.6389	-82.429	15.8	65	Foliation	Paris_Mountain_Thrust_Sheet	34082-F4
34.6429	-82.4537	9.6	70	Foliation	Paris_Mountain_Thrust_Sheet	34082-F4
34.6471	-82.4102	231	20	Foliation	Paris_Mountain_Thrust_Sheet	34082-F4
34.6481	-82.4661	12.6	40	Foliation	Six_Mile_Thrust_Sheet	34082-F4
34.6542	-82.4751	52.1	35	Foliation	Six_Mile_Thrust_Sheet	34082-F4
34.6605	-82.4323	343	55	Foliation	Paris_Mountain_Thrust_Sheet	34082-F4
34.6635	-82.457	349.6	50	Foliation	Six_Mile_Thrust_Sheet	34082-F4
34.664	-82.4801	47.2	70	Foliation	Six_Mile_Thrust_Sheet	34082-F4
34.6682	-82.4279	357.8	70	Foliation	Paris_Mountain_Thrust_Sheet	34082-F4
34.6729	-82.4731	62.8	50	Foliation	Six_Mile_Thrust_Sheet	34082-F4
34.6734	-82.4112	0.4	55	Foliation	Paris_Mountain_Thrust_Sheet	34082-F4
34.6744	-82.4447	356.4	90	Foliation	Paris_Mountain_Thrust_Sheet	34082-F4
34.6745	-82.4972	81.7	35	Foliation	Six_Mile_Thrust_Sheet	34082-F4
34.6752	-82.4537	25	45	Foliation	Paris_Mountain_Thrust_Sheet	34082-F4
34.6776	-82.4838	2.6	0	Foliation	Six_Mile_Thrust_Sheet	34082-F4
34.6797	-82.4352	0.6	20	Foliation	Paris_Mountain_Thrust_Sheet	34082-F4
34.6811	-82.4232	7.6	45	Foliation	Paris_Mountain_Thrust_Sheet	34082-F4
34.6835	-82.4389	322.3	90	Foliation	Paris_Mountain_Thrust_Sheet	34082-F4
34.6874	-82.4525	352.2	90	Foliation	Paris_Mountain_Thrust_Sheet	34082-F4
34.6896	-82.4881	81.8	45	Foliation	Six_Mile_Thrust_Sheet	34082-F4
34.6934	-82.4682	0.6	80	Foliation	Six_Mile_Thrust_Sheet	34082-F4
34.6992	-82.4446	25.2	70	Foliation	Paris_Mountain_Thrust_Sheet	34082-F4
34.6998	-82.4952	38.5	15	Foliation	Six_Mile_Thrust_Sheet	34082-F4
34.7011	-82.4829	29.3	40	Foliation	Six_Mile_Thrust_Sheet	34082-F4
34.705	-82.4515	2.3	90	Foliation	Paris_Mountain_Thrust_Sheet	34082-F4
34.7056	-82.4698	354.5	50	Foliation	Six_Mile_Thrust_Sheet	34082-F4
34.7126	-82.4464	0.4	75	Foliation	Paris_Mountain_Thrust_Sheet	34082-F4
34.7161	-82.4658	2	50	Foliation	Six_Mile_Thrust_Sheet	34082-F4
34.7181	-82.4819	349.1	55	Foliation	Six_Mile_Thrust_Sheet	34082-F4
34.725	-82.4861	122.2	65	Foliation	Six_Mile_Thrust_Sheet	34082-F4
34.7305	-82.4294	347.6	80	Foliation	Paris_Mountain_Thrust_Sheet	34082-F4
34.7306	-82.3811	357	70	Foliation	Paris_Mountain_Thrust_Sheet	34082-F4
34.7324	-82.4856	349.3	60	Foliation	Six_Mile_Thrust_Sheet	34082-F4
34.7377	-82.4095	35.6	50	Foliation	Paris_Mountain_Thrust_Sheet	34082-F4
34.6261	-82.5311	324.8	18	Foliation	Six_Mile_Thrust_Sheet	34082-F5
[truncated: 4,209 more rows]

## Sheet: G50323
Frothingham, M.G., 2022, Don’t judge an orogen by its cover: Kinematics of the Appalachian décollement from seismic anisotropy: Geology, v. 50, https://doi.org/10.1130/G50323.1
